# Supplementary material for: Ligand-controlled regiodivergent direct arylation of indoles via oxidative boron Heck reaction
Source: Royal Society of Chemistry journal article supplement (doi:10.1039/d2qo01326f), 2022-01-01
Supplement: d2qo01326f1.pdf [file d2qo01326f1.pdf]

## Supporting Information

### Ligand-Controlled Regiodivergent Direct Arylation of Indoles via Oxidative Boron Heck Reaction

Yo-Sep Yang,<sup>a</sup> Sangmin Lee,<sup>a</sup> Seung Hwan Son,<sup>a</sup> Hyung-Seok Yoo,<sup>a</sup>  
Yoon Hu Jang,<sup>a</sup> Jeong-Won Shin,<sup>a</sup> Hyuck-Jae Won,<sup>a</sup> Jaehoon Sim,<sup>b</sup>  
and Nam-Jung Kim<sup>a</sup>

<sup>a</sup>College of Pharmacy, Kyung Hee University, Seoul 02447, Republic of Korea

<sup>b</sup>College of Pharmacy, Chungnam National University, Daejeon 34134, Republic of Korea

|                                                     |               |
|-----------------------------------------------------|---------------|
| <b>1. General Information</b>                       | <b>S2</b>     |
| <b>2. Optimization for Regioselective Arylation</b> | <b>S3-5</b>   |
| <b>3. Procedure for Regioselective Arylation</b>    | <b>S5</b>     |
| <b>4. Mechanism study</b>                           | <b>S6-9</b>   |
| <b>5. Characterization of Products</b>              | <b>S10-33</b> |
| <b>6. Copies of NMR spectra</b>                     | <b>S34-92</b> |
| <b>7. References</b>                                | <b>S93</b>    |

## 1. General Information

**General:** Unless noted otherwise, all starting materials and reagents were obtained from commercial suppliers (Strem chemicals, Aldrich, Acros Organics, Alfa Aesar, and TCI) and were used without further purification. All solvents used for routine isolation of products and chromatography were reagent grade. Reaction flasks were dried at 80 °C. Analytical thin-layer chromatography (TLC) was performed using Merck silica gel glass plates with F-254 indicator, visualized by UV light (254 nm and 365 nm), in some cases stained with ninhydrin or Hanessian's stain followed by heating. Flash column chromatography was performed with a Biotage Isolera One purification system equipped with 5, 10, and 25 g Biotage® Sfar Silica 60 µm columns with the indicated solvents. NMR spectra were recorded and obtained using a Varian VNMRS500 (500 MHz for <sup>1</sup>H NMR, 126 MHz for <sup>13</sup>C NMR, and 471 MHz for <sup>19</sup>F NMR) spectrometer, respectively. <sup>1</sup>H, <sup>13</sup>C, and <sup>19</sup>F NMR chemical shifts are reported in parts per million (ppm) relative to TMS (tetramethylsilane), with the residual solvent peak used as an internal reference. Signals are reported as m (multiplet), s (singlet), bs (broad singlet), d (doublet), dd (doublet of doublet), td (triplet of doublet), t (triplet), and q (quartet); the coupling constants (*J*) are reported in Hertz (Hz). High-resolution mass spectrometry (HRMS) data were obtained with a Jeol AccuTOF (JMS-T100TD) equipped with a DART (direct analysis in real-time) ion source from Ionsens, (Tokyo, Japan) in the ESI mode.

## 2. Optimization for Regioselective Arylation

Table S1. Ligand Screening

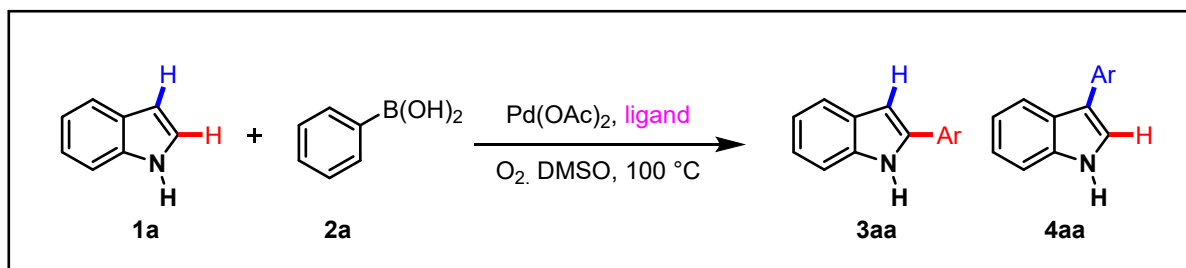

| entry <sup>a</sup> | ligand    | yield (%) <sup>b</sup> | 3aa:4aa <sup>c</sup> |
|--------------------|-----------|------------------------|----------------------|
| 1                  | none      | 0                      | -                    |
| 2                  | L1        | 50                     | 1:>20                |
| 3                  | L2        | 54                     | 1:>20                |
| 4                  | L3        | 60                     | 1:>20                |
| <b>5</b>           | <b>L4</b> | <b>80</b>              | <b>1:&gt;20</b>      |
| 6                  | L5        | 29                     | 1:>20                |
| <b>7</b>           | <b>L6</b> | <b>34</b>              | <b>&gt;20:1</b>      |
| 8                  | L7        | 33                     | 2:1                  |
| 9                  | L8        | 36                     | 1:3                  |
| 10                 | L9        | 34                     | 1:1                  |
| 11                 | L10       | 40                     | 3:2                  |
| 12                 | L11       | 53                     | 1:>20                |

<sup>a</sup>Reaction conditions: **1a** (0.3 mmol, 1 equiv.), **2a** (0.6 mmol, 2 equiv.), Pd(OAc)<sub>2</sub> (10 mol%), ligand (20 mol%), solvent (1.0 mL), 100 °C, 24 h. <sup>b</sup>Yields were determined by <sup>1</sup>H NMR with internal standard 1,3,5-trimethoxybenzene. <sup>c</sup>Ratio was determined by <sup>1</sup>H-NMR.

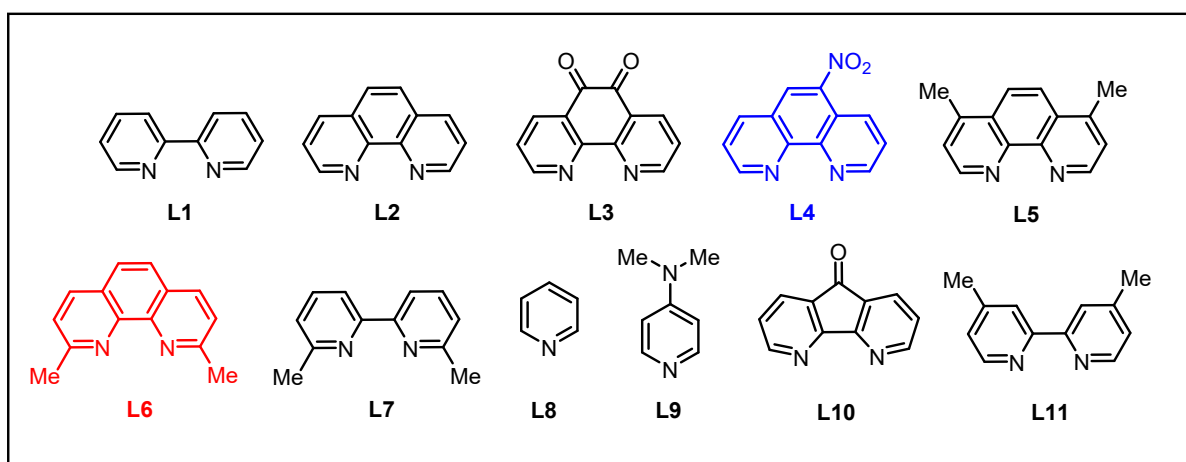

**Table S2. Solvent Screening for C2-Selective Arylation**

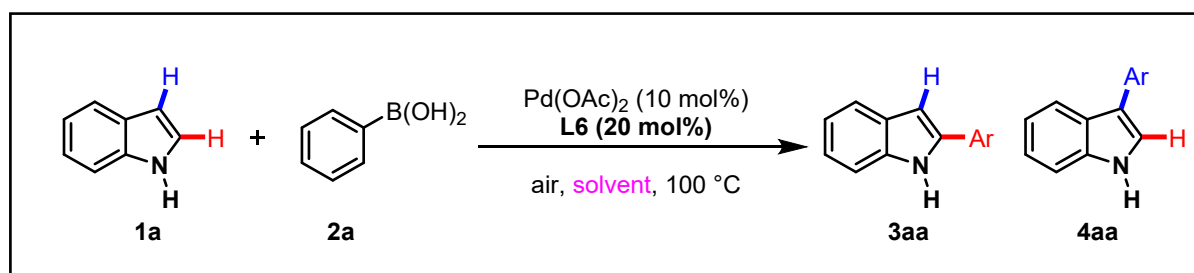

| entry <sup>a</sup>   | solvent          | yield (%) <sup>b</sup> | <b>3aa:4aa</b> <sup>c</sup> |
|----------------------|------------------|------------------------|-----------------------------|
| 1                    | DMSO             | 34                     | >20:1                       |
| 2                    | DMF              | 22                     | >20:1                       |
| 3                    | chlorobenzene    | 43                     | >20:1                       |
| 4                    | toluene          | 43                     | 5:1                         |
| 5                    | <i>o</i> -xylene | 40                     | 10:1                        |
| 6                    | H <sub>2</sub> O | 34                     | >20:1                       |
| 7                    | DCE              | 100                    | >20:1                       |
| 8 <sup>d</sup>       | DCE              | 91                     | >20:1                       |
| <b>9<sup>e</sup></b> | <b>DCE</b>       | <b>100</b>             | <b>&gt;20:1</b>             |
| 10 <sup>f</sup>      | DCE              | 86                     | >20:1                       |
| 11 <sup>g</sup>      | DCE              | 91                     | >20:1                       |

<sup>a</sup>Reaction conditions: **1a** (0.3 mmol, 1 equiv.), **2a** (0.6 mmol, 2 equiv.),  $\text{Pd}(\text{OAc})_2$  (10 mol%), **Ligand 6** (20 mol%), solvent (1.0 mL), 100 °C under air, 24 h. <sup>b</sup>Yields were determined by <sup>1</sup>H NMR with internal standard 1,3,5-trimethoxybenzene. <sup>c</sup>Ratio was determined by <sup>1</sup>H-NMR. <sup>d</sup>O<sub>2</sub> was used instead of Air. <sup>e</sup>The reaction was done at 80 °C. <sup>f</sup>The reaction was done at 60 °C. <sup>g</sup> $\text{Pd}(\text{OAc})_2$  (5 mol%) and **Ligand 6** (10 mol%).

**Table S3. Solvent Screening for C3-Selective Arylation**

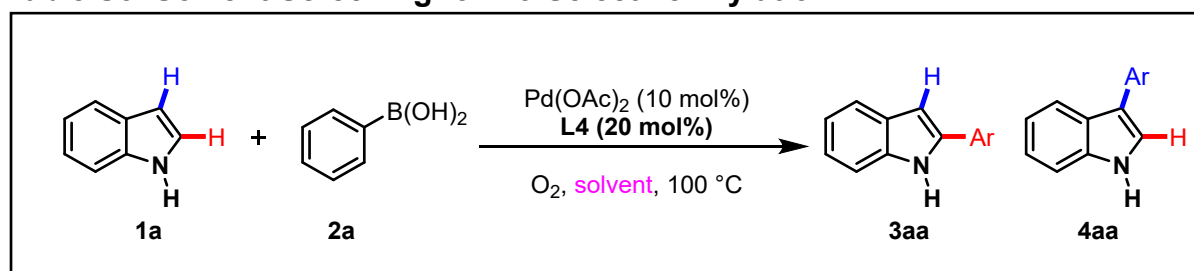

| entry <sup>a</sup>   | solvent          | yield (%) <sup>b</sup> | <b>3aa:4aa</b> <sup>c</sup> |
|----------------------|------------------|------------------------|-----------------------------|
| 1                    | DMSO             | 80                     | 1:>20                       |
| 2                    | chlorobenzene    | 32                     | 1:>20                       |
| 3                    | DCE              | 34                     | 1:>20                       |
| 4                    | AcOH             | 11                     | 1:>20                       |
| 5                    | H <sub>2</sub> O | 43                     | 1:>20                       |
| 6                    | DMF              | 91                     | 1:>20                       |
| 7 <sup>d</sup>       | DMF              | 82                     | 1:>20                       |
| 8 <sup>e</sup>       | DMF              | 54                     | 1:>20                       |
| <b>9<sup>f</sup></b> | <b>DMF</b>       | <b>93</b>              | <b>1:&gt;20</b>             |

<sup>a</sup>Reaction conditions: **1a** (0.3 mmol, 1 equiv.), **2a** (0.6 mmol, 2 equiv.),  $\text{Pd}(\text{OAc})_2$  (10 mol%), **Ligand 4** (20 mol%), solvent (1.0

mL), 100 °C under O<sub>2</sub> atmosphere, 24 h. <sup>b</sup>Yields were determined by <sup>1</sup>H NMR with internal standard 1,3,5-trimethoxybenzene. <sup>c</sup>Ratio was determined by <sup>1</sup>H-NMR. <sup>d</sup>Pd(OAc)<sub>2</sub> (5 mol%) and Ligand 4 (10 mol%). <sup>e</sup>The reaction was done at 80 °C. <sup>f</sup>Air instead of O<sub>2</sub>.

### 3. General Procedure for Regioselective Arylation

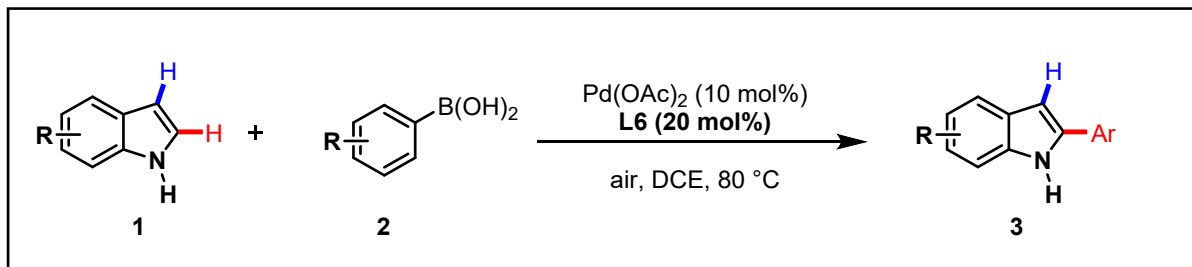

**Procedure for C2-Selective Arylation of 1H-Indoles (3aa-3an):** To a 10 mL round bottom flask, 1H-indole **1** (0.30 mmol, 1.0 equiv.), phenylboronic acid **2** (0.60 mmol, 2.0 equiv.) Pd(OAc)<sub>2</sub> (10.0 mol%), and neocuproine (**Ligand 6**, 20.0 mol%) were added, and then dissolved with DCE (1.0 mL). Under air, the reaction mixture was stirred at 80 °C in an oil bath until the complete conversion of the starting material on TLC. Then, the reaction mixture was cooled to room temperature, and added water. The resulting mixture was extracted with EtOAc. The combined organic layers were dried with Na<sub>2</sub>SO<sub>4</sub>, filtered, and concentrated in vacuo. The residue was purified by column chromatography.

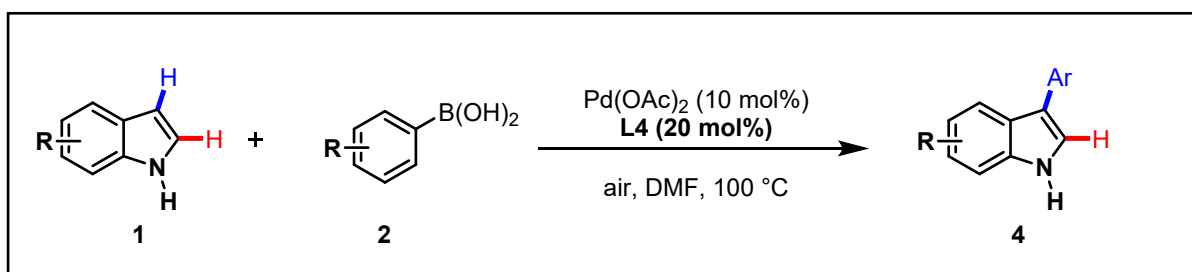

**Procedure for C3-Selective Arylation of Indoles (4aa-4ao):** To a 10 mL round bottom flask, 1H-indole **1** (0.30 mmol, 1.0 equiv.), phenylboronic acid **2** (0.60 mmol, 2.0 equiv.) Pd(OAc)<sub>2</sub> (10.0 mol%), and 5-nitro-1,10-phenanthroline (**Ligand 4**, 20.0 mol%) were added, and then dissolved with DMF (1.0 mL). Under air, the reaction mixture was stirred at 100 °C in an oil bath until the complete conversion of the starting material on TLC. Then, the reaction mixture was cooled to room temperature, and added water. The resulting mixture was extracted with EtOAc. The combined organic layers were dried with Na<sub>2</sub>SO<sub>4</sub>, filtered, and concentrated in vacuo. The residue was purified by column chromatography.

## 4. Mechanism Study

### (1) Experiment for Monitoring the Deuteration Progress of *N*-Methylindole

#### a. The Pd(II)/L6 System

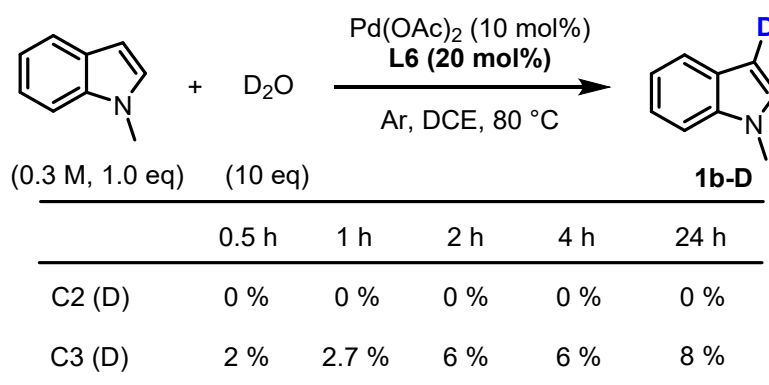

To a 10 mL round bottom flask, *N*-methylindole (0.30 mmol, 1.0 equiv.), D<sub>2</sub>O (3.0 mmol, 10.0 equiv.) Pd(OAc)<sub>2</sub> (0.03 mmol, 10.0 mol%), and Ligand 6 (0.06 mmol, 20.0 mol%) were added, and then dissolved with DCE (1.0 mL). Under Ar, the reaction mixture was stirred at 80 °C in an oil bath and aliquots of the reaction mixture (ca. 0.1 mL each) were sampled by a syringe at 0.5 h, 1 h, 2 h, 4 h, and 24 h, respectively. The aliquots were immediately quenched by brine (5.0 mL) and extracted with EA (1.0 mL), and the organic layer was separated and submitted to <sup>1</sup>H analysis for determining the deuterium incorporation at C2- and C3- positions.

#### b. The Pd(II)/L4 System:

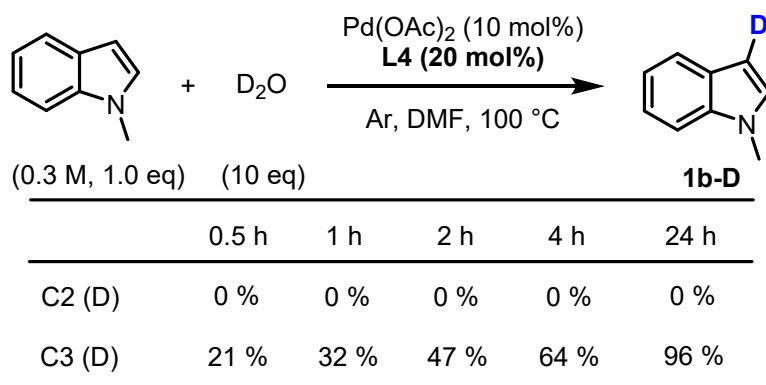

To a 10 mL round bottom flask, *N*-methylindole (0.30 mmol, 1.0 equiv.), D<sub>2</sub>O (3.0 mmol, 10.0 equiv.)

$\text{Pd}(\text{OAc})_2$  (0.03 mmol, 10.0 mol%), and Ligand 4 (0.06 mmol, 20.0 mol%) were added, and then dissolved with DMF (1.0 mL). Under Ar, the reaction mixture was stirred at 100 °C in an oil bath and aliquots of the reaction mixture (ca. 0.1 mL each) were sampled by a syringe at 0.5 h, 1 h, 2 h, 4 h, and 24 h, respectively. The aliquots were immediately quenched by brine (5.0 mL) and extracted with EA (1.0 mL), and the organic layer was separated and submitted to  $^1\text{H}$  analysis for determining the deuterium incorporation at C2- and C3-positions.

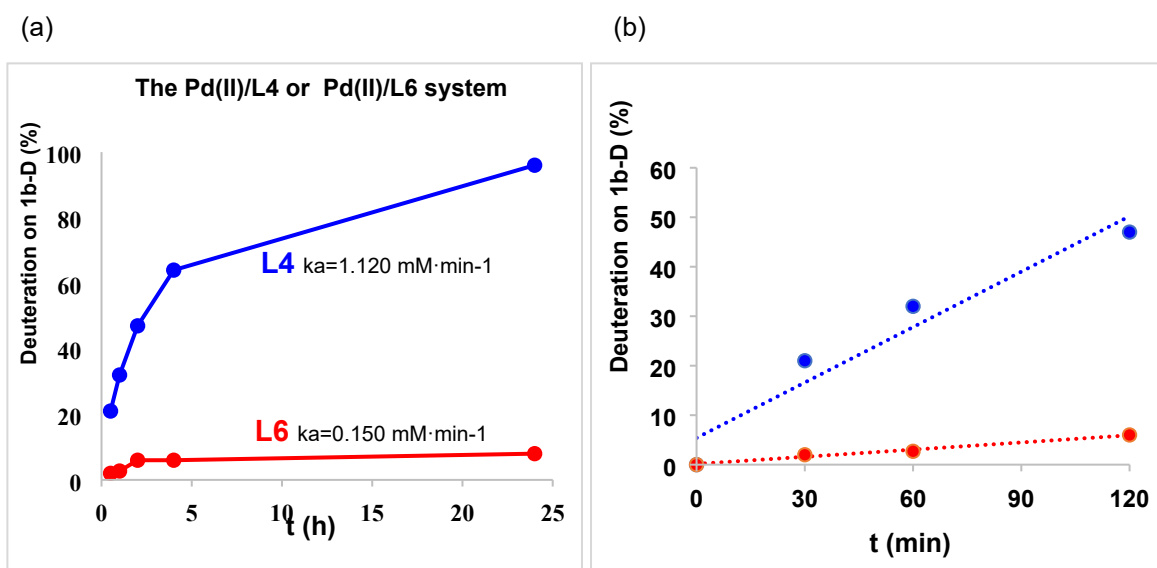

**Figure S1.** (a) Plots of the yields of products 1b-D. (b) Initial rates for the formation of 1b-D (**Ligand 4**) 1.120  $\text{mM}\cdot\text{min}^{-1}$ ; (**Ligand 6**) 0.150  $\text{mM}\cdot\text{min}^{-1}$ .

## (2) Experiment for Elucidating Steric Effect by Ligand 6 (L6)

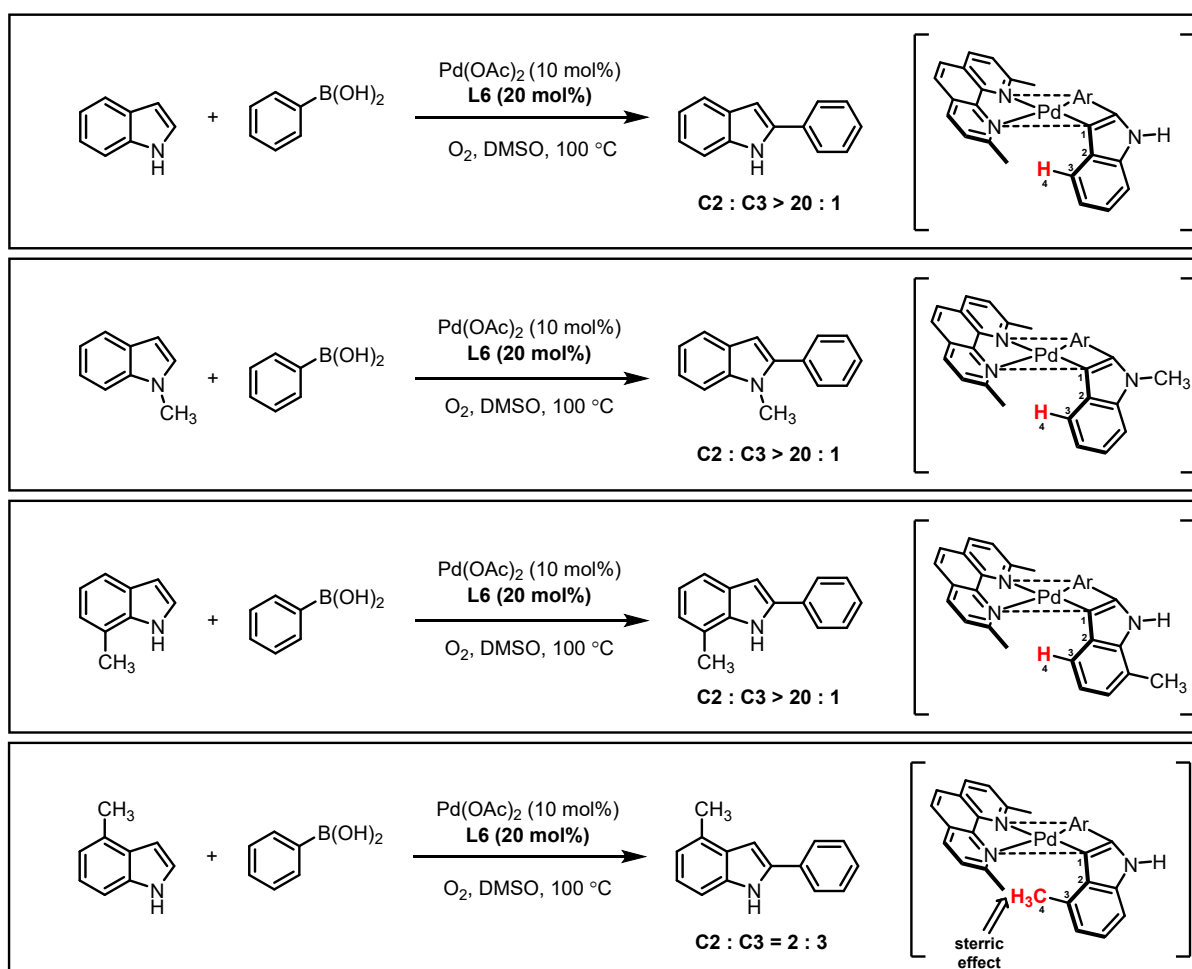

To a 10 mL round bottom flask, indoles (0.30 mmol, 1.0 equiv.), phenylboronic acid (0.60 mmol, 2.0 equiv.) Pd(OAc)<sub>2</sub> (10.0 mol%), and Ligand 6 (20.0 mol%) were added, and then dissolved with DMSO (1.0 mL). Under O<sub>2</sub>, the reaction mixture was stirred at 100 °C in an oil bath for 24h. Then, Ratio was determined by <sup>1</sup>H-NMR with internal standard 1,3,5-trimethoxybenzene.



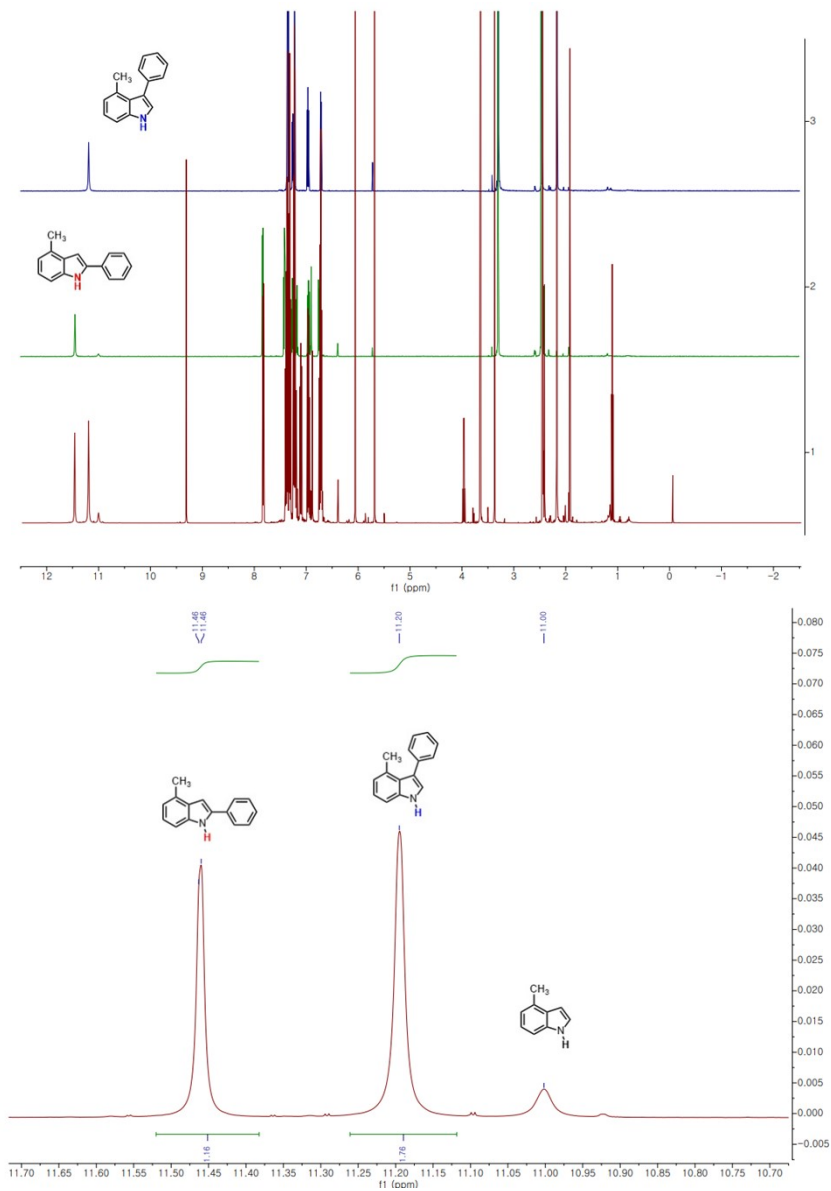

**Figure S2.** C2 to C3 arylated ratio of 4-methyl indole in Ligand 6 system by  $^1\text{H-NMR}$  in  $\text{DMSO-}d_6$

## 5. Compound Characterization Data

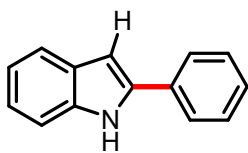

**2-Phenyl-1H-indole (3aa)**<sup>1</sup>; white solid (53.9 mg, 93%), mp 186-188°C.

**<sup>1</sup>H NMR** (500 MHz, Chloroform-*d*) δ 8.32 (s, 1H), 7.70 – 7.64 (m, 3H), 7.49 – 7.44 (m, 2H), 7.41 (dd, *J* = 8.1, 0.9 Hz, 1H), 7.35 (m, 1H), 7.23 (ddd, *J* = 8.2, 7.1, 1.2 Hz, 1H), 7.16 (ddd, *J* = 8.0, 7.1, 1.0 Hz, 1H), 6.86 (dd, *J* = 2.2, 0.9 Hz, 1H).

**<sup>13</sup>C{<sup>1</sup>H} NMR** (126 MHz, Chloroform-*d*) δ 138.00, 136.92, 132.46, 129.37, 129.15, 127.84, 125.27, 122.48, 120.80, 120.40, 111.04, 100.09.

**HR-MS (ESI+)** *m/z*: [M+H]<sup>+</sup> calcd for C<sub>14</sub>H<sub>11</sub>N, 194.0964; found, 194.1005.

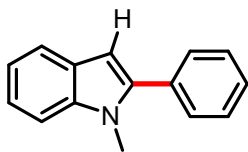

**1-Methyl-2-phenyl-1H-indole (3ba)**<sup>1</sup>; white solid (60.9 mg, 98%), mp 100-101 °C.

**<sup>1</sup>H NMR** (500 MHz, Chloroform-*d*) δ 7.66 (dt, *J* = 7.8, 1.0 Hz, 1H), 7.56 – 7.52 (m, 2H), 7.51 – 7.46 (m, 2H), 7.42 (m, 1H), 7.39 (dq, *J* = 8.2, 0.9 Hz, 1H), 7.27 (m, 1H), 7.17 (ddd, *J* = 7.9, 7.0, 1.0 Hz, 1H), 6.59 (d, *J* = 0.9 Hz, 1H), 3.77 (s, 3H).

**<sup>13</sup>C{<sup>1</sup>H} NMR** (126 MHz, Chloroform-*d*) δ 141.70, 138.46, 132.96, 129.52, 128.63, 128.07, 128.00, 121.79, 120.60, 119.99, 109.75, 101.76, 31.32.

**HR-MS (ESI+)** *m/z*: [M+H]<sup>+</sup> calcd for C<sub>15</sub>H<sub>13</sub>N, 208.1121; found, 208.1160.

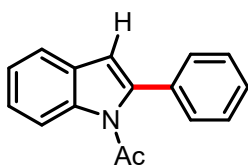

**1-(2-Phenyl-1H-indol-1-yl)ethan-1-one (3ca)<sup>2</sup>**; colorless oil (C2 condition 27.5 mg, 39% / C3 condition 31.1 mg, 44%).

**<sup>1</sup>H NMR** (500 MHz, DMSO-*d*<sub>6</sub>) δ 8.22 (dq, *J* = 8.3, 0.9 Hz, 1H), 7.62 (ddd, *J* = 7.6, 1.4, 0.7 Hz, 1H), 7.57 – 7.53 (m, 2H), 7.52 – 7.48 (m, 2H), 7.46 (m, 1H), 7.34 (ddd, *J* = 8.4, 7.2, 1.4 Hz, 1H), 7.28 (td, *J* = 7.4, 1.1 Hz, 1H), 6.78 (d, *J* = 0.8 Hz, 1H), 2.09 (s, 3H).

**<sup>13</sup>C{<sup>1</sup>H} NMR** (126 MHz, DMSO-*d*<sub>6</sub>) δ 171.05, 139.80, 136.98, 133.60, 128.93, 128.80, 128.71, 128.59, 124.76, 123.47, 120.60, 115.41, 110.95, 27.59.

**HR-MS (EI) *m/z***: [M] calcd for C<sub>16</sub>H<sub>13</sub>NO, 235.0997; found, 235.0997.

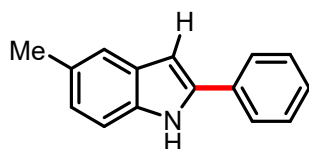

**5-Methyl-2-phenyl-1H-indole (3da)<sup>1</sup>**; white solid (57.2 mg, 92%), mp 218-219 °C.

**<sup>1</sup>H NMR** (500 MHz, Chloroform-*d*) δ 8.22 (s, 1H), 7.72 – 7.61 (m, 2H), 7.50 – 7.39 (m, 3H), 7.34 (m, 1H), 7.30 (d, *J* = 8.3 Hz, 1H), 7.05 (dd, *J* = 8.2, 1.7 Hz, 1H), 6.77 (dd, *J* = 2.1, 0.9 Hz, 1H), 2.48 (s, 3H).

**<sup>13</sup>C{<sup>1</sup>H} NMR** (126 MHz, Chloroform-*d*) δ 138.06, 135.27, 132.61, 129.66, 129.61, 129.12, 127.70, 125.18, 124.11, 120.43, 110.68, 99.66, 21.61.

**HR-MS (ESI+) *m/z***: [M+H]<sup>+</sup> calcd for C<sub>15</sub>H<sub>13</sub>N, 208.1121; found, 208.1170.

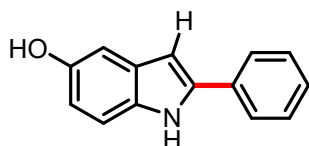

**2-Phenyl-1H-indol-5-ol (3ea)<sup>3</sup>**; white solid (57.8 mg, 92%), mp 246-251 °C.

**<sup>1</sup>H NMR** (500 MHz, DMSO-*d*<sub>6</sub>) δ 11.21 (d, *J* = 2.2 Hz, 1H), 8.69 (s, 1H), 7.85 – 7.75 (m, 2H), 7.47 – 7.39 (m, 2H), 7.27 (m, 1H), 7.19 (d, *J* = 8.6 Hz, 1H), 6.84 (d, *J* = 2.3 Hz, 1H), 6.71 (dd, *J* = 2.2, 0.9 Hz, 1H), 6.62 (dd, *J* = 8.6, 2.3 Hz, 1H).

**<sup>13</sup>C{<sup>1</sup>H} NMR** (126 MHz, DMSO-*d*<sub>6</sub>) δ 150.93, 137.85, 132.47, 131.72, 129.39, 128.86, 127.14, 124.77, 112.01, 111.64, 103.75, 98.02.

**HR-MS (EI) *m/z***: [M] calcd for C<sub>14</sub>H<sub>11</sub>NO, 209.0841; found, 209.0841.

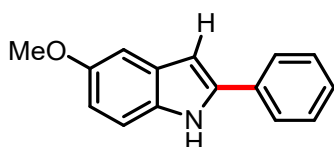

**5-Methoxy-2-phenyl-1*H*-indole (3fa)<sup>1</sup>**; white solid (60.9 mg, 91%), mp 170-171°C.

**<sup>1</sup>H NMR** (500 MHz, DMSO-*d*<sub>6</sub>) δ 11.37 (s, 1H), 7.88 – 7.78 (m, 2H), 7.49 – 7.40 (m, 2H), 7.34 – 7.25 (m, 2H), 7.02 (d, *J* = 2.4 Hz, 1H), 6.81 (dd, *J* = 2.2, 0.9 Hz, 1H), 6.74 (dd, *J* = 8.7, 2.5 Hz, 1H), 3.76 (s, 3H).

**<sup>13</sup>C{<sup>1</sup>H} NMR** (126 MHz, DMSO-*d*<sub>6</sub>) δ 153.62, 138.10, 132.33, 132.28, 129.03, 128.91, 127.29, 124.85, 111.99, 111.85, 101.53, 98.58, 55.26.

**HR-MS (ESI+) *m/z***: [M+H]<sup>+</sup> calcd for C<sub>15</sub>H<sub>13</sub>NO, 224.1070; found, 224.1119.

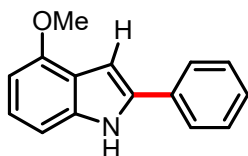

**4-Methoxy-2-phenyl-1*H*-indole (3ga)<sup>4</sup>**; colorless oil (50.2 mg, 75%)

**<sup>1</sup>H NMR** (500 MHz, DMSO-*d*<sub>6</sub>) δ 11.52 (s, 1H), 7.90 – 7.82 (m, 2H), 7.48 – 7.40 (m, 2H), 7.28 (m, 1H), 7.06 – 6.99 (m, 2H), 6.91 (d, *J* = 2.2 Hz, 1H), 6.50 (m, 1H), 3.88 (s, 3H).

**<sup>13</sup>C{<sup>1</sup>H} NMR** (126 MHz, DMSO-*d*<sub>6</sub>) δ 152.74, 138.39, 136.09, 132.24, 128.90, 127.16, 124.82, 122.53, 119.22, 104.72, 99.38, 96.02, 54.92.

**HR-MS (ESI+) *m/z***: [M+H]<sup>+</sup> calcd for C<sub>15</sub>H<sub>13</sub>NO, 224.1070; found, 224.1120.

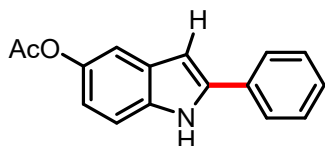

**2-Phenyl-1H-indol-5-yl acetate (3ha)**<sup>1</sup>; light orange solid (67.8 mg, 90%), mp 170-175 °C.

**<sup>1</sup>H NMR** (500 MHz, DMSO-*d*<sub>6</sub>) δ 11.64 (s, 1H), 7.91 – 7.82 (m, 2H), 7.50 – 7.44 (m, 2H), 7.39 (dt, *J* = 8.7, 0.7 Hz, 1H), 7.32 (m, 1H), 7.24 (d, *J* = 2.2 Hz, 1H), 6.90 (dd, *J* = 2.3, 0.9 Hz, 1H), 6.84 (dd, *J* = 8.7, 2.3 Hz, 1H), 2.27 (s, 3H).

**<sup>13</sup>C{<sup>1</sup>H} NMR** (126 MHz, DMSO-*d*<sub>6</sub>) δ 169.89, 144.02, 139.02, 134.89, 131.97, 128.98, 128.69, 127.67, 125.08, 116.00, 112.09, 111.61, 98.84, 20.96.

**HR-MS (ESI+)** *m/z*: [M+H]<sup>+</sup> calcd for C<sub>16</sub>H<sub>13</sub>NO<sub>2</sub>, 252.1019; found, 252.1018.

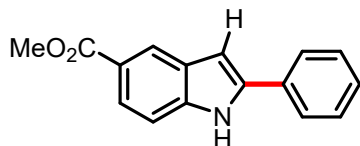

**Methyl 2-phenyl-1H-indole-5-carboxylate (3ia)**<sup>5</sup>; white solid (67.8 mg, 90%), mp 185-190 °C.

**<sup>1</sup>H NMR** (500 MHz, DMSO-*d*<sub>6</sub>) δ 11.95 (s, 1H), 8.25 (s, 1H), 7.88 (d, *J* = 7.4 Hz, 2H), 7.75 (dd, *J* = 8.5, 1.5 Hz, 1H), 7.52 – 7.44 (m, 3H), 7.35 (t, *J* = 7.3 Hz, 1H), 7.05 (m, 1H), 3.85 (s, 3H).

**<sup>13</sup>C{<sup>1</sup>H} NMR** (126 MHz, DMSO-*d*<sub>6</sub>) δ 167.22, 139.74, 139.51, 131.60, 129.02, 128.25, 127.97, 125.23, 122.61, 122.57, 120.90, 111.26, 99.94, 51.71.

**HR-MS (ESI+)** *m/z*: [M+H]<sup>+</sup> calcd for C<sub>16</sub>H<sub>13</sub>NO<sub>2</sub>, 252.1019; found, 252.1066.

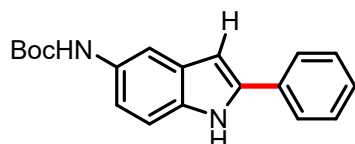

**tert-Butyl (2-phenyl-1H-indol-5-yl)carbamate (3ja)**<sup>6</sup>; white solid (87.0 mg, 90%), mp 165-170 °C.

**<sup>1</sup>H NMR** (500 MHz, DMSO-*d*<sub>6</sub>) δ 11.37 (s, 1H), 9.07 (s, 1H), 7.83 (dd, *J* = 8.3, 1.1 Hz, 2H), 7.67 (s, 1H), 7.44 (t, *J* = 7.8 Hz, 2H), 7.29 (t, *J* = 7.4 Hz, 1H), 7.26 (d, *J* = 8.7 Hz, 1H), 7.14 (d, *J* = 7.9 Hz, 1H), 6.82 (d, *J* = 1.5 Hz, 1H), 1.49 (s, 9H).

**<sup>13</sup>C{<sup>1</sup>H} NMR** (126 MHz, DMSO-*d*<sub>6</sub>) δ 153.19, 138.04, 133.46, 132.28, 131.89, 128.88, 128.60, 127.30, 124.88, 111.03, 98.61, 78.36, 28.28.

**HR-MS (ESI+)** *m/z*: [M+H]<sup>+</sup> calcd for C<sub>19</sub>H<sub>20</sub>N<sub>2</sub>O<sub>2</sub>, 309.1598; found, 309.1625.

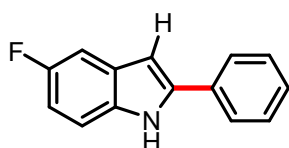

**5-Fluoro-2-phenyl-1H-indole (3ka)**<sup>3</sup>; white solid (48.8 mg, 77%), mp 175-180 °C.

**<sup>1</sup>H NMR** (500 MHz, DMSO-*d*<sub>6</sub>) δ 11.64 (s, 1H), 7.89 – 7.82 (m, 2H), 7.52 – 7.43 (m, 2H), 7.38 (m, 1H), 7.33 (m, 1H), 7.28 (dd, *J* = 10.0, 2.6 Hz, 1H), 6.94 (ddd, *J* = 9.6, 8.7, 2.6 Hz, 1H), 6.89 (dd, *J* = 2.3, 0.9 Hz, 1H).

**<sup>13</sup>C{<sup>1</sup>H} NMR** (126 MHz, DMSO-*d*<sub>6</sub>) δ 157.18, 139.57, 133.82, 131.89, 128.97, 128.86, 127.75, 125.11, 112.22, 109.65, 104.51, 98.85.

**<sup>19</sup>F NMR** (471 MHz, DMSO-*D*<sub>6</sub>) δ -124.53.

**HR-MS (ESI+)** *m/z*: [M+H]<sup>+</sup> calcd for C<sub>14</sub>H<sub>10</sub>FN, 212.0870; found, 212.0900.

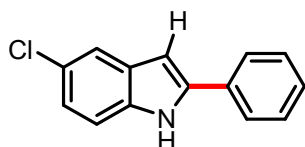

**5-Chloro-2-phenyl-1H-indole (3la)**<sup>3</sup>; white solid (49.0 mg, 72%), mp 190°C.

**<sup>1</sup>H NMR** (500 MHz, Chloroform-*d*) δ 8.35 (s, 1H), 7.69 – 7.62 (m, 2H), 7.59 (d, *J* = 2.0 Hz, 1H), 7.46 (dd, *J* = 8.4, 7.0 Hz, 2H), 7.35 (m, 1H), 7.30 (d, *J* = 8.5 Hz, 1H), 7.15 (dd, *J* = 8.5, 2.0 Hz, 1H), 6.76 (m, 1H).

$^{13}\text{C}\{^1\text{H}\}$  NMR (126 MHz, Chloroform-*d*)  $\delta$  139.42, 135.25, 131.98, 130.45, 129.24, 128.27, 125.97, 125.37, 122.70, 120.12, 112.00, 99.68.

**HR-MS (ESI+)** *m/z*:  $[\text{M}+\text{H}]^+$  calcd for  $\text{C}_{14}\text{H}_{10}\text{ClN}$ , 228.0575; found, 228.0605.

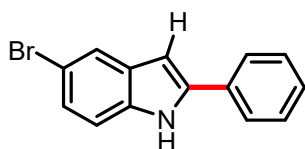

**5-Bromo-2-phenyl-1H-indole (3ma)**<sup>1</sup>; white solid (60.4 mg, 74%), mp 195 °C.

$^1\text{H}$  NMR (500 MHz, DMSO-*d*<sub>6</sub>)  $\delta$  11.75 (s, 1H), 7.89 – 7.82 (m, 2H), 7.71 (d, *J* = 1.9 Hz, 1H), 7.47 (t, *J* = 7.8 Hz, 2H), 7.39 – 7.30 (m, 2H), 7.20 (dd, *J* = 8.5, 2.0 Hz, 1H), 6.89 (dd, *J* = 2.2, 0.9 Hz, 1H).

$^{13}\text{C}\{^1\text{H}\}$  NMR (126 MHz, DMSO-*D*<sub>6</sub>)  $\delta$  139.17, 135.79, 131.65, 130.51, 129.00, 127.90, 125.20, 123.99, 122.13, 113.26, 111.87, 98.27.

**HR-MS (ESI+)** *m/z*:  $[\text{M}+\text{H}]^+$  calcd for  $\text{C}_{14}\text{H}_{10}\text{BrN}$ , 272.0069; found, 272.0060.

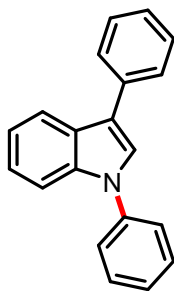

**1,3-Diphenyl-1H-indole(3na)**<sup>1</sup>; yellow oil (37.8 mg, 46%)

$^1\text{H}$  NMR (500 MHz, Chloroform-*d*)  $\delta$  8.02 (m, 1H), 7.78 – 7.71 (m, 2H), 7.64 (m, 1H), 7.61 – 7.53 (m, 5H), 7.53 – 7.47 (m, 2H), 7.41 (tt, *J* = 6.4, 1.9 Hz, 1H), 7.35 (m, 1H), 7.33 – 7.25 (m, 2H).

$^{13}\text{C}\{^1\text{H}\}$  NMR (126 MHz, Chloroform-*d*)  $\delta$  139.62, 136.75, 135.22, 129.81, 128.97, 127.73, 127.24, 126.79, 126.35, 125.65, 124.59, 122.93, 121.01, 120.26, 119.22, 110.96,

**HR-MS (EI)** *m/z*:  $[\text{M}]$  calcd for  $\text{C}_{20}\text{H}_{15}\text{N}$ , 270.1277; found, 270.1233.

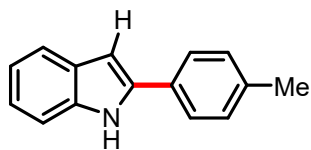

**2-(p-Tolyl)-1H-indole (3ab)<sup>3</sup>**; white solid (46.0 mg, 74%), mp 215 °C.

**<sup>1</sup>H NMR** (500 MHz, Chloroform-*d*) δ 8.29 (s, 1H), 7.64 (d, *J* = 7.9 Hz, 1H), 7.57 (d, *J* = 8.2 Hz, 2H), 7.40 (dd, *J* = 8.0, 0.9 Hz, 1H), 7.27 (s, 1H), 7.25 (m, 1H), 7.20 (ddd, *J* = 8.1, 7.1, 1.2 Hz, 1H), 7.13 (m, 1H), 6.80 (dd, *J* = 2.1, 0.8 Hz, 1H), 2.41 (s, 3H).

**<sup>13</sup>C{<sup>1</sup>H} NMR** (126 MHz, Chloroform-*d*) δ 138.18, 137.78, 136.82, 129.84, 129.68, 129.46, 125.20, 122.24, 120.65, 120.32, 110.96, 99.50, 21.37.

**HR-MS (ESI+)** *m/z*: [M+H]<sup>+</sup> calcd for C<sub>15</sub>H<sub>13</sub>N, 208.1121; found, 208.1160.

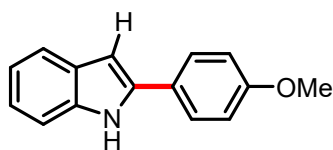

**2-(4-Methoxyphenyl)-1H-indole (3ac)<sup>3</sup>**; white solid (37.5 mg, 56%), mp 227-230 °C.

**<sup>1</sup>H NMR** (500 MHz, DMSO-*d*<sub>6</sub>) δ 11.40 (s, 1H), 7.83 – 7.73 (m, 2H), 7.49 (d, *J* = 7.8 Hz, 1H), 7.37 (d, *J* = 8.0 Hz, 1H), 7.10 – 6.98 (m, 3H), 6.96 (m, 1H), 6.76 (dd, *J* = 2.2, 0.9 Hz, 1H), 3.80 (s, 3H).

**<sup>13</sup>C{<sup>1</sup>H} NMR** (126 MHz, DMSO-*d*<sub>6</sub>) δ 158.79, 137.78, 136.93, 128.83, 126.36, 124.90, 121.04, 119.67, 119.23, 114.36, 111.07, 97.33, 55.21.

**HR-MS (ESI+)** *m/z*: [M+H]<sup>+</sup> calcd for C<sub>15</sub>H<sub>13</sub>NO, 224.1070; found, 224.1111.

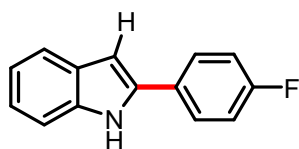

**2-(4-Fluorophenyl)-1H-indole (3ad)<sup>4</sup>**; white solid (55.1 mg, 87%), mp 185 °C.



**<sup>1</sup>H NMR** (500 MHz, DMSO-*d*<sub>6</sub>) δ 11.52 (s, 1H), 7.93 – 7.86 (m, 2H), 7.52 (d, *J* = 7.8 Hz, 1H), 7.39 (dq, *J* = 8.3, 1.0 Hz, 1H), 7.34 – 7.26 (m, 2H), 7.09 (ddd, *J* = 8.2, 7.0, 1.2 Hz, 1H), 6.99 (ddd, *J* = 8.0, 7.0, 1.1 Hz, 1H), 6.87 (dd, *J* = 2.2, 0.9 Hz, 1H).

**<sup>13</sup>C{<sup>1</sup>H} NMR** (126 MHz, DMSO-*d*<sub>6</sub>) δ 162.59 (d, *J* = 244.7 Hz), 137.46 (d, *J* = 50.7 Hz), 128.92 (d, *J* = 3.0 Hz), 128.69, 127.01 (d, *J* = 7.9 Hz), 121.62, 119.77 (d, *J* = 77.0 Hz), 115.84 (d, *J* = 21.6 Hz), 111.32, 98.69.

**<sup>19</sup>F NMR** (471 MHz, DMSO-*d*<sub>6</sub>) δ -114.51.

**HR-MS (ESI+)** *m/z*: [M+H]<sup>+</sup> calcd for C<sub>14</sub>H<sub>10</sub>FN, 212.0870; found, 212.0886.

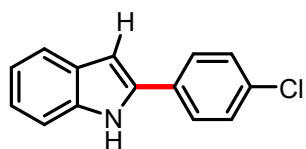

**2-(4-Chlorophenyl)-1H-indole (3ae)**<sup>3</sup>; white solid (60.1 mg, 88%), mp 190-195 °C.

**<sup>1</sup>H NMR** (500 MHz, Chloroform-*d*) δ 8.28 (s, 1H), 7.63 (d, *J* = 7.9 Hz, 1H), 7.61 – 7.56 (m, 2H), 7.45 – 7.38 (m, 3H), 7.21 (ddd, *J* = 8.2, 7.1, 1.1 Hz, 1H), 7.14 (m, 1H), 6.82 (dd, *J* = 2.1, 0.8 Hz, 1H).

**<sup>13</sup>C{<sup>1</sup>H} NMR** (126 MHz, Chloroform-*d*) δ 137.02, 136.81, 133.58, 131.01, 129.37, 129.29, 126.45, 122.83, 120.90, 120.61, 111.08, 100.60.

**HR-MS (ESI+)** *m/z*: [M+H]<sup>+</sup> calcd for C<sub>14</sub>H<sub>10</sub>ClN, 228.0575; found, 228.0574.

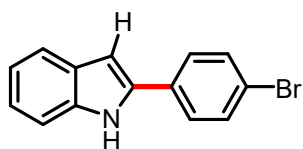

**2-(4-Bromophenyl)-1H-indole (3af)**<sup>1</sup>; white solid (63.7 mg, 78%), mp 210 °C.

**<sup>1</sup>H NMR** (500 MHz, DMSO-*d*<sub>6</sub>) δ 11.59 (s, 1H), 7.84 – 7.79 (m, 2H), 7.68 – 7.62 (m, 2H), 7.53 (d, *J* = 7.9 Hz, 1H), 7.39 (dd, *J* = 8.1, 0.8 Hz, 1H), 7.11 (ddd, *J* = 8.2, 7.0, 1.2 Hz, 1H), 7.00 (ddd, *J* = 7.9, 7.0, 1.0 Hz, 1H), 6.95 (dd, *J* = 2.1, 0.8 Hz, 1H).

$^{13}\text{C}\{^1\text{H}\}$  NMR (126 MHz, DMSO- $d_6$ )  $\delta$  137.24, 136.39, 131.82, 131.49, 128.54, 126.91, 121.93, 120.32, 120.20, 119.55, 111.39, 99.38.

**HR-MS (ESI+)**  $m/z$ :  $[\text{M}+\text{H}]^+$  calcd for  $\text{C}_{14}\text{H}_{10}\text{BrN}$ , 272.0069; found, 272.0025.

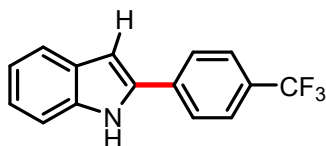

**2-(4-(Trifluoromethyl)phenyl)-1H-indole (3ag)**<sup>7</sup>; white solid (70.5 mg, 90%), mp 235 °C.

$^1\text{H}$  NMR (500 MHz, DMSO- $d_6$ )  $\delta$  11.74 (s, 1H), 8.07 (d,  $J$  = 8.1 Hz, 2H), 7.81 (d,  $J$  = 8.3 Hz, 2H), 7.57 (d,  $J$  = 7.9 Hz, 1H), 7.44 (dd,  $J$  = 8.1, 0.8 Hz, 1H), 7.15 (ddd,  $J$  = 8.1, 7.0, 1.1 Hz, 1H), 7.07 (d,  $J$  = 1.6 Hz, 1H), 7.03 (ddd,  $J$  = 7.9, 7.1, 0.9 Hz, 1H).

$^{13}\text{C}\{^1\text{H}\}$  NMR (126 MHz, DMSO- $d_6$ )  $\delta$  137.54, 136.13, 135.87, 128.43, 127.28, 125.88, 125.38, 123.31, 122.47, 120.55, 119.74, 111.60, 100.77.

$^{19}\text{F}$  NMR (471 MHz, DMSO- $d_6$ )  $\delta$  -60.79.

**HR-MS (ESI+)**  $m/z$ :  $[\text{M}+\text{H}]^+$  calcd for  $\text{C}_{15}\text{H}_{10}\text{F}_3\text{N}$ , 262.0838; found, 262.0814.

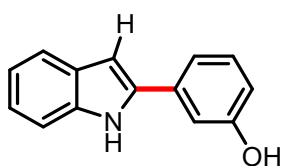

**3-(1H-Indol-2-yl)phenol (3ah)**<sup>8</sup>; white solid (55.8 mg, 89%), mp 170 °C.

$^1\text{H}$  NMR (500 MHz, DMSO- $d_6$ )  $\delta$  11.46 (s, 1H), 9.56 (s, 1H), 7.52 (d,  $J$  = 7.9 Hz, 1H), 7.38 (dd,  $J$  = 8.1, 0.8 Hz, 1H), 7.31 – 7.21 (m, 3H), 7.08 (ddd,  $J$  = 8.2, 7.0, 1.2 Hz, 1H), 6.98 (ddd,  $J$  = 8.0, 7.0, 1.0 Hz, 1H), 6.80 (dd,  $J$  = 2.1, 0.7 Hz, 1H), 6.74 (ddd,  $J$  = 7.8, 2.4, 1.1 Hz, 1H).

$^{13}\text{C}\{^1\text{H}\}$  NMR (126 MHz, DMSO- $d_6$ )  $\delta$  157.79, 137.85, 137.04, 133.55, 129.91, 128.59, 121.48, 120.01, 119.33, 116.04, 114.57, 111.92, 111.32, 98.52.

**HR-MS (ESI+)**  $m/z$ :  $[\text{M}+\text{H}]^+$  calcd for  $\text{C}_{14}\text{H}_{11}\text{NO}$ , 210.0913; found, 210.0937.

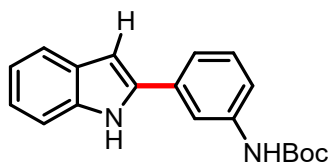

**tert-Butyl(3-(1H-indol-2-yl)phenyl)carbamate (3ai)**<sup>9</sup>; white solid (86.9 mg, 96%), mp 70-75 °C.

**<sup>1</sup>H NMR** (500 MHz, DMSO-*d*<sub>6</sub>) δ 11.48 (s, 1H), 9.44 (s, 1H), 8.01 (s, 1H), 7.54 (dt, *J* = 7.7, 0.9 Hz, 1H), 7.44 (dt, *J* = 7.0, 1.8 Hz, 1H), 7.40 (m, 1H), 7.33 (q, *J* = 8.3 Hz, 2H), 7.09 (ddd, *J* = 8.1, 7.1, 1.1 Hz, 1H), 6.99 (ddd, *J* = 7.9, 7.1, 1.0 Hz, 1H), 6.75 (m, 1H), 1.50 (s, 9H).

**<sup>13</sup>C{<sup>1</sup>H} NMR** (126 MHz, DMSO-*d*<sub>6</sub>) δ 152.89, 140.08, 137.89, 137.15, 132.76, 129.19, 128.58, 121.54, 120.06, 119.37, 119.02, 117.65, 115.01, 111.41, 98.60, 79.17, 28.18.

**HR-MS (ESI+)** *m/z*: [M+H]<sup>+</sup> calcd for C<sub>19</sub>H<sub>20</sub>N<sub>2</sub>O<sub>2</sub>, 309.1598; found, 309.1565.

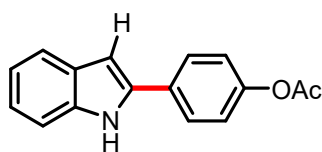

**4-(1H-Indol-2-yl)phenyl acetate (3aj)**; white solid (57.3 mg, 76%), mp 200 °C.

**<sup>1</sup>H NMR** (500 MHz, DMSO-*d*<sub>6</sub>) δ 11.54 (s, 1H), 7.93 – 7.84 (m, 2H), 7.53 (d, *J* = 7.8 Hz, 1H), 7.39 (m, 1H), 7.27 – 7.18 (m, 2H), 7.10 (ddd, *J* = 8.1, 6.9, 1.2 Hz, 1H), 7.01 (m, 1H), 6.89 (d, *J* = 2.1 Hz, 1H), 2.29 (s, 3H).

**<sup>13</sup>C{<sup>1</sup>H} NMR** (126 MHz, DMSO-*d*<sub>6</sub>) δ 169.29, 149.76, 137.17, 136.95, 129.96, 128.66, 126.07, 122.38, 121.65, 120.09, 119.45, 111.33, 98.83, 20.91.

**HR-MS (ESI+)** *m/z*: [M+H]<sup>+</sup> calcd for C<sub>16</sub>H<sub>13</sub>NO<sub>2</sub>, 252.1019; found, 252.1012.

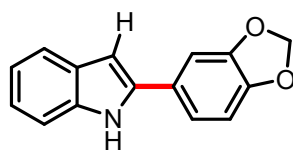

**2-(Benzo[d][1,3]dioxol-5-yl)-1H-indole (3ak)<sup>7</sup>**; white solid (62.6 mg, 88%), mp 155-160 °C.

**<sup>1</sup>H NMR** (500 MHz, DMSO-*d*<sub>6</sub>) δ 11.39 (s, 1H), 7.49 (d, *J* = 7.9 Hz, 1H), 7.45 (d, *J* = 1.7 Hz, 1H), 7.37 (dt, *J* = 8.1, 1.3 Hz, 2H), 7.07 (ddd, *J* = 8.1, 7.1, 1.2 Hz, 1H), 7.01 (d, *J* = 8.1 Hz, 1H), 6.98 (ddd, *J* = 7.9, 7.1, 1.0 Hz, 1H), 6.79 (dd, *J* = 2.1, 0.8 Hz, 1H), 6.07 (s, 2H).

**<sup>13</sup>C{<sup>1</sup>H} NMR** (126 MHz, DMSO-*d*<sub>6</sub>) δ 147.91, 146.74, 137.67, 136.91, 128.71, 126.56, 121.27, 119.78, 119.32, 118.73, 111.11, 108.75, 105.58, 101.19, 97.99.

**HR-MS (ESI+)** *m/z*: [M+H]<sup>+</sup> calcd for C<sub>15</sub>H<sub>11</sub>NO<sub>2</sub>, 238.0863; found, 238.0899.

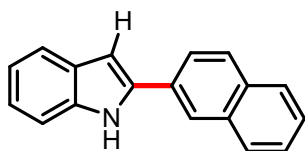

**2-(Naphthalen-2-yl)-1H-indole (3al)<sup>10</sup>**; pale yellow solid (70.0 mg, 96%), mp 196-197 °C.

**<sup>1</sup>H NMR** (500 MHz, DMSO-*d*<sub>6</sub>) δ 11.72 (s, 1H), 8.39 (s, 1H), 8.04 (m, 1H), 7.99 (d, *J* = 8.6 Hz, 1H), 7.96 – 7.88 (m, 2H), 7.61 – 7.48 (m, 3H), 7.45 (d, *J* = 8.1 Hz, 1H), 7.13 (ddt, *J* = 8.2, 7.0, 1.3 Hz, 1H), 7.08 – 6.94 (m, 2H).

**<sup>13</sup>C{<sup>1</sup>H} NMR** (126 MHz, DMSO-*d*<sub>6</sub>) δ 137.57, 137.40, 133.28, 132.30, 129.70, 128.70, 128.44, 127.90, 127.72, 126.74, 126.05, 123.85, 122.82, 121.84, 120.17, 119.48, 111.35, 99.58.

**HR-MS (ESI+)** *m/z*: [M+H]<sup>+</sup> calcd for C<sub>18</sub>H<sub>13</sub>N, 244.1121; found, 244.1119.

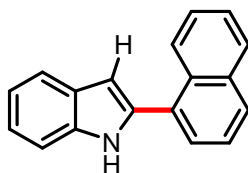

**2-(Naphthalen-1-yl)-1H-indole (3am)<sup>1</sup>**; white solid (31.4 mg, 43%), mp 95-100 °C.

**<sup>1</sup>H NMR** (500 MHz, DMSO-*d*<sub>6</sub>) δ 11.58 (s, 1H), 8.32 (m, 1H), 8.03 (m, 1H), 7.99 (d, *J* = 8.2 Hz, 1H), 7.72 (dd, *J* = 7.1, 1.2 Hz, 1H), 7.66 – 7.54 (m, 4H), 7.44 (m, 1H), 7.15 (ddd, *J* = 8.1, 7.1, 1.2 Hz, 1H), 7.05 (m, 1H), 6.74 (dd, *J* = 2.0, 0.7 Hz, 1H).

**<sup>13</sup>C{<sup>1</sup>H} NMR** (126 MHz, DMSO-*d*<sub>6</sub>) δ 136.70, 136.48, 133.59, 130.91, 130.79, 128.47, 128.37, 128.17, 127.30, 126.76, 126.16, 125.55, 125.49, 121.43, 120.06, 119.30, 111.38, 102.48.

**HR-MS (EI) *m/z***: [M] calcd for C<sub>18</sub>H<sub>13</sub>N, 243.1048; found, 243.1048.

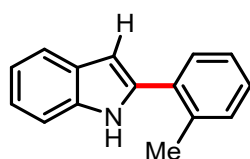

**2-(*o*-Tolyl)-1H-indole (3an)**<sup>7</sup>; white solid (36.7 mg, 59%), mp 95 °C.

**<sup>1</sup>H NMR** (500 MHz, DMSO-*d*<sub>6</sub>) δ 11.28 (s, 1H), 7.57 – 7.52 (m, 2H), 7.39 (dd, *J* = 8.1, 0.9 Hz, 1H), 7.36 – 7.26 (m, 3H), 7.10 (ddd, *J* = 8.1, 7.1, 1.2 Hz, 1H), 7.00 (ddd, *J* = 7.9, 7.1, 1.0 Hz, 1H), 6.57 (dd, *J* = 2.2, 0.8 Hz, 1H), 2.47 (s, 3H).

**<sup>13</sup>C{<sup>1</sup>H} NMR** (126 MHz, DMSO-*d*<sub>6</sub>) δ 137.34, 136.40, 135.48, 132.51, 130.95, 129.01, 128.36, 127.60, 126.02, 121.26, 119.95, 119.12, 111.22, 101.74, 21.08.

**HR-MS (EI) *m/z***: [M] calcd for C<sub>15</sub>H<sub>13</sub>N, 207.1048; found, 207.1048.

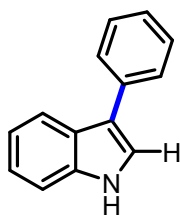

**3-Phenyl-1H-indole (4aa)**<sup>5</sup>; white solid (53.9 mg, 93%), mp 85 °C.

**<sup>1</sup>H NMR** (500 MHz, Chloroform-*d*) δ 8.19 (s, 1H), 7.98 (d, *J* = 8.0 Hz, 1H), 7.71 (dd, *J* = 8.2, 1.2 Hz, 2H), 7.53 – 7.41 (m, 3H), 7.37 (d, *J* = 2.5 Hz, 1H), 7.34 – 7.20 (m, 3H).

$^{13}\text{C}\{^1\text{H}\}$  NMR (126 MHz, Chloroform-*d*)  $\delta$  136.75, 135.66, 128.91, 127.61, 126.12, 125.83, 122.54, 121.92, 120.44, 119.94, 118.42, 111.54.

**HR-MS (ESI+)** *m/z*:  $[\text{M}+\text{H}]^+$  calcd for  $\text{C}_{14}\text{H}_{11}\text{N}$ , 194.0964; found, 194.0968.

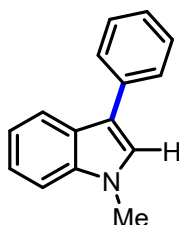

**1-Methyl-3-phenyl-1H-indole (4ba)**<sup>11</sup>; colorless oil (33.6 mg, 54%).

$^1\text{H}$  NMR (500 MHz, Chloroform-*d*)  $\delta$  7.97 (dt,  $J$  = 8.0, 0.9 Hz, 1H), 7.69 – 7.65 (m, 2H), 7.48 – 7.43 (m, 2H), 7.38 (dt,  $J$  = 8.2, 0.8 Hz, 1H), 7.33 – 7.27 (m, 2H), 7.25 (s, 1H), 7.21 (ddd,  $J$  = 8.0, 7.0, 1.1 Hz, 1H), 3.85 (s, 3H).

$^{13}\text{C}\{^1\text{H}\}$  NMR (126 MHz, Chloroform-*d*)  $\delta$  137.58, 135.79, 128.88, 127.45, 126.69, 126.25, 125.83, 122.10, 120.06, 120.01, 116.82, 109.67, 33.03.

**HR-MS (ESI+)** *m/z*:  $[\text{M}+\text{H}]^+$  calcd for  $\text{C}_{15}\text{H}_{13}\text{N}$ , 208.1121; found, 208.1119.

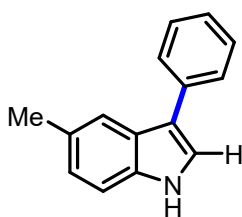

**5-Methyl-3-phenyl-1H-indole (4da)**<sup>12</sup>; white solid (47.9 mg, 77%), mp 95 °C.

$^1\text{H}$  NMR (500 MHz, Chloroform-*d*)  $\delta$  8.07 (s, 1H), 7.78 (s, 1H), 7.75 – 7.67 (m, 2H), 7.49 (t,  $J$  = 7.8 Hz, 2H), 7.37 – 7.30 (m, 3H), 7.12 (d,  $J$  = 8.3 Hz, 1H), 2.52 (s, 3H).

$^{13}\text{C}\{^1\text{H}\}$  NMR (126 MHz, Chloroform-*d*)  $\delta$  135.83, 135.06, 129.74, 128.87, 127.61, 126.06, 126.00, 124.13, 122.07, 119.51, 117.94, 111.18, 21.76.

**HR-MS (ESI+)** *m/z*:  $[\text{M}+\text{H}]^+$  calcd for  $\text{C}_{15}\text{H}_{13}\text{N}$ , 208.1121; found, 208.1129.

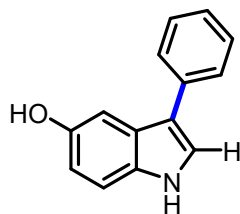

**3-Phenyl-1H-indol-5-ol (4ea)**<sup>3</sup>; white solid (43.3 mg, 77%), mp 120 °C.

**<sup>1</sup>H NMR** (500 MHz, DMSO-*d*<sub>6</sub>) δ 11.06 (s, 1H), 8.75 (s, 1H), 7.62 (dd, *J* = 8.3, 1.2 Hz, 2H), 7.57 (d, *J* = 2.6 Hz, 1H), 7.44 – 7.37 (m, 2H), 7.28 – 7.15 (m, 3H), 6.67 (dd, *J* = 8.6, 2.3 Hz, 1H).

**<sup>13</sup>C{<sup>1</sup>H} NMR** (126 MHz, DMSO-*d*<sub>6</sub>) δ 151.34, 136.33, 131.40, 128.72, 126.15, 125.66, 124.94, 123.80, 114.81, 112.34, 111.72, 102.90.

**HR-MS (ESI+)** *m/z*: [M+H]<sup>+</sup> calcd for C<sub>14</sub>H<sub>11</sub>NO, 210.0913; found, 210.0920

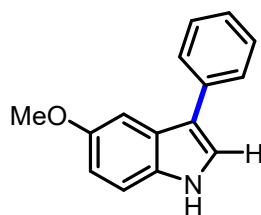

**5-Methoxy-3-phenyl-1H-indole (4fa)**<sup>5</sup>; light yellow solid (56.2 mg, 84%), mp 65 °C.

**<sup>1</sup>H NMR** (500 MHz, Chloroform-*d*) δ 8.14 (s, 1H), 7.72 – 7.64 (m, 2H), 7.52 – 7.45 (m, 2H), 7.41 (d, *J* = 2.4 Hz, 1H), 7.37 – 7.29 (m, 3H), 6.94 (dd, *J* = 8.8, 2.4 Hz, 1H), 3.89 (s, 3H).

**<sup>13</sup>C{<sup>1</sup>H} NMR** (126 MHz, Chloroform-*d*) δ 154.82, 135.81, 131.88, 128.95, 127.50, 126.23, 126.05, 122.74, 118.24, 112.81, 112.25, 101.63, 56.10.

**HR-MS (ESI+)** *m/z*: [M+H]<sup>+</sup> calcd for C<sub>15</sub>H<sub>13</sub>NO, 224.1070; found, 224.1071.

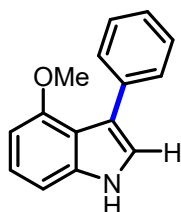

**4-Methoxy-3-phenyl-1H-indole (4ga)**<sup>5</sup>; colorless oil (53.5 mg, 80%)

**<sup>1</sup>H NMR** (500 MHz, Chloroform-*d*) δ 8.16 (s, 1H), 7.69 – 7.65 (m, 2H), 7.44 – 7.39 (m, 2H), 7.31 (m, 1H), 7.19 (t, *J* = 8.0 Hz, 1H), 7.11 (d, *J* = 2.5 Hz, 1H), 7.03 (dd, *J* = 8.2, 0.7 Hz, 1H), 6.61 (d, *J* = 7.7 Hz, 1H), 3.85 (s, 3H).

**<sup>13</sup>C{<sup>1</sup>H} NMR** (126 MHz, Chloroform-*d*) δ 154.73, 138.35, 136.21, 129.79, 127.70, 125.85, 123.25, 122.04, 119.00, 115.76, 104.73, 100.61, 55.24.

**HR-MS (ESI+)** *m/z*: [M+H]<sup>+</sup> calcd for C<sub>15</sub>H<sub>13</sub>NO, 224.1070; found, 224.1072.

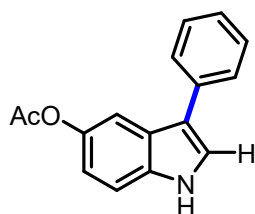

**3-Phenyl-1H-indol-5-yl acetate (4ha)**; white solid (57.3 mg, 76%), mp 173 °C.

**<sup>1</sup>H NMR** (500 MHz, Chloroform-*d*) δ 8.30 (s, 1H), 7.63 – 7.59 (m, 3H), 7.47 – 7.41 (m, 2H), 7.37 – 7.33 (m, 2H), 7.29 (m, 1H), 6.96 (dd, *J* = 8.7, 2.2 Hz, 1H), 2.34 (s, 3H).

**<sup>13</sup>C{<sup>1</sup>H} NMR** (126 MHz, Chloroform-*d*) δ 170.78, 144.97, 135.27, 134.64, 128.92, 127.54, 126.24, 126.22, 123.26, 118.73, 116.67, 112.05, 112.02, 21.33.

**HR-MS (ESI+)** *m/z*: [M+H]<sup>+</sup> calcd for C<sub>16</sub>H<sub>13</sub>NO<sub>2</sub>, 252.1019; found, 252.1009.

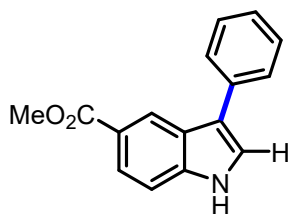

**Methyl 3-phenyl-1H-indole-5-carboxylate (4ia)**<sup>13</sup>; white solid (57.3 mg, 76%), mp 158-160 °C.

**<sup>1</sup>H NMR** (500 MHz, DMSO-*d*<sub>6</sub>) δ 11.77 (s, 1H), 8.51 (d, *J* = 1.7 Hz, 1H), 7.85 – 7.76 (m, 2H), 7.70 – 7.63 (m, 2H), 7.54 (d, *J* = 8.6 Hz, 1H), 7.53 – 7.43 (m, 2H), 7.29 (m, 1H), 3.85 (s, 3H).



$^{13}\text{C}\{^1\text{H}\}$  NMR (126 MHz, DMSO- $d_6$ )  $\delta$  167.24, 139.44, 134.97, 128.99, 126.85, 125.93, 125.26, 124.69, 122.45, 121.44, 121.07, 117.17, 112.04, 51.80.

HR-MS (ESI+)  $m/z$ :  $[M+H]^+$  calcd for  $\text{C}_{16}\text{H}_{13}\text{NO}_2$ , 252.1019; found, 252.1015.

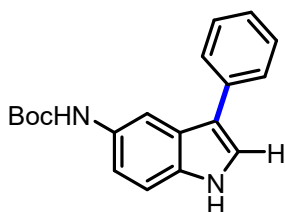

**tert-Butyl (3-phenyl-1H-indol-5-yl)carbamate (4ja)**; a light yellow solid (60.1 mg, 65%), mp 205 °C.

$^1\text{H}$  NMR (500 MHz, DMSO- $d_6$ )  $\delta$  11.17 (d,  $J$  = 2.6 Hz, 1H), 9.07 (s, 1H), 8.01 (s, 1H), 7.62 – 7.56 (m, 3H), 7.41 – 7.36 (m, 2H), 7.27 (m, 1H), 7.23 – 7.14 (m, 2H), 1.44 (s, 9H).

$^{13}\text{C}\{^1\text{H}\}$  NMR (126 MHz, DMSO- $d_6$ )  $\delta$  153.21, 136.05, 133.12, 132.27, 128.75, 126.36, 125.17, 124.90, 123.92, 115.52, 114.69, 111.68, 108.31, 78.38, 28.27.

HR-MS (ESI+)  $m/z$ :  $[M+H]^+$  calcd for  $\text{C}_{19}\text{H}_{20}\text{N}_2\text{O}_2$ , 309.1598; found, 306.1603.

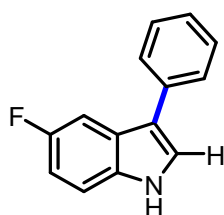

**5-Fluoro-3-phenyl-1H-indole (4ka)**<sup>4</sup>; white solid (38.0 mg, 60%), mp 50 °C.

$^1\text{H}$  NMR (500 MHz, Chloroform- $d$ )  $\delta$  8.25 (s, 1H), 7.65 – 7.61 (m, 2H), 7.58 (m, 1H), 7.49 – 7.43 (m, 2H), 7.42 (d,  $J$  = 2.6 Hz, 1H), 7.35 (ddd,  $J$  = 8.9, 4.4, 0.5 Hz, 1H), 7.30 (m, 1H), 7.01 (td,  $J$  = 9.0, 2.5 Hz, 1H).

$^{13}\text{C}\{^1\text{H}\}$  NMR (126 MHz, Chloroform- $d$ )  $\delta$  158.56 (d,  $J$  = 234.9 Hz), 135.20, 133.27, 129.01, 127.41, 126.33, 126.25 (d,  $J$  = 9.9 Hz), 123.56, 118.71 (d,  $J$  = 4.6 Hz), 112.14 (d,  $J$  = 9.7 Hz), 111.01 (d,  $J$  = 26.3 Hz), 104.95 (d,  $J$  = 24.2 Hz).

$^{19}\text{F}$  NMR (471 MHz, Chloroform-*d*)  $\delta$  -123.69.

HR-MS (ESI+) *m/z*:  $[\text{M}+\text{H}]^+$  calcd for  $\text{C}_{14}\text{H}_{10}\text{FN}$ , 212.0870; found, 212.0876.

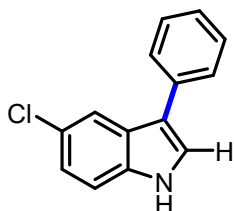

**5-Chloro-3-phenyl-1H-indole (4la)**<sup>4</sup>; white solid (43.7 mg, 64%), mp 90-95 °C.

$^1\text{H}$  NMR (500 MHz, Chloroform-*d*)  $\delta$  8.22 (s, 1H), 7.92 (d,  $J$  = 2.0 Hz, 1H), 7.67 – 7.61 (m, 2H), 7.48 (tt,  $J$  = 8.0, 1.5 Hz, 2H), 7.37 (d,  $J$  = 2.5 Hz, 1H), 7.35 – 7.31 (m, 2H), 7.22 (dd,  $J$  = 8.6, 2.0 Hz, 1H).

$^{13}\text{C}\{^1\text{H}\}$  NMR (126 MHz, Chloroform-*d*)  $\delta$  135.05, 134.92, 129.02, 127.57, 126.94, 126.46, 126.24, 123.13, 122.87, 119.43, 118.30, 112.52.

HR-MS (ESI+) *m/z*:  $[\text{M}+\text{H}]^+$  calcd for  $\text{C}_{14}\text{H}_{10}\text{ClN}$ , 228.0575; found, 228.0578.

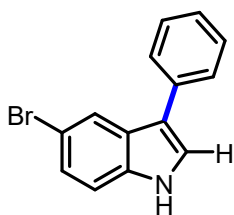

**5-Bromo-3-phenyl-1H-indole (4ma)**<sup>11</sup>; colorless oil (49.0 mg, 60%).

$^1\text{H}$  NMR (500 MHz, DMSO-*d*<sub>6</sub>)  $\delta$  11.45 (s, 1H), 7.85 (d,  $J$  = 7.9 Hz, 1H), 7.75 (s, 1H), 7.71 – 7.63 (m, 2H), 7.62 – 7.53 (m, 2H), 7.45 (d,  $J$  = 8.0 Hz, 1H), 7.16 (t,  $J$  = 7.5 Hz, 1H), 7.10 (t,  $J$  = 7.4 Hz, 1H).

$^{13}\text{C}\{^1\text{H}\}$  NMR (126 MHz, DMSO-*d*<sub>6</sub>)  $\delta$  137.11, 135.37, 131.79, 128.52, 124.86, 124.15, 121.78, 120.02, 119.07, 118.04, 114.53, 112.27.

HR-MS (ESI+) *m/z*:  $[\text{M}+\text{H}]^+$  calcd for  $\text{C}_{14}\text{H}_{10}\text{BrN}$ , 272.0069; found, 272.0071.

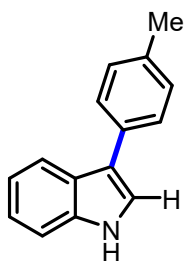

**3-(p-Tolyl)-1H-indole (4ab)<sup>11</sup>**; white solid (50.3 mg, 81%), mp 90 °C.

**<sup>1</sup>H NMR** (500 MHz, DMSO-*d*<sub>6</sub>) δ 11.30 (s, 1H), 7.83 (d, *J* = 7.9 Hz, 1H), 7.63 (d, *J* = 2.5 Hz, 1H), 7.57 (d, *J* = 8.1 Hz, 2H), 7.43 (d, *J* = 8.1 Hz, 1H), 7.23 (d, *J* = 7.9 Hz, 2H), 7.14 (m, 1H), 7.07 (td, *J* = 7.5, 7.1, 1.0 Hz, 1H), 2.33 (s, 3H).

**<sup>13</sup>C{<sup>1</sup>H} NMR** (126 MHz, DMSO-*d*<sub>6</sub>) δ 137.03, 134.42, 133.14, 129.54, 126.60, 125.20, 123.18, 121.51, 119.65, 119.19, 115.82, 112.10, 20.91.

**HR-MS (ESI+)** *m/z*: [M+H]<sup>+</sup> calcd for C<sub>15</sub>H<sub>13</sub>N, 208.1121; found, 208.1120.

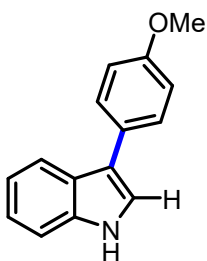

**3-(4-Methoxyphenyl)-1H-indole (4ac)<sup>5</sup>**; white solid (42.8 mg, 64%), mp 130 °C.

**<sup>1</sup>H NMR** (500 MHz, Chloroform-*d*) δ 8.17 (s, 1H), 7.92 (m, 1H), 7.65 – 7.57 (m, 2H), 7.42 (d, *J* = 8.1 Hz, 1H), 7.32 – 7.24 (m, 2H), 7.21 (ddd, *J* = 8.0, 7.0, 1.1 Hz, 1H), 7.06 – 6.98 (m, 2H), 3.88 (s, 3H).

**<sup>13</sup>C{<sup>1</sup>H} NMR** (126 MHz, Chloroform-*d*) δ 158.21, 136.69, 128.75, 128.23, 126.01, 122.43, 121.29, 120.27, 119.86, 118.12, 114.38, 111.48, 55.49.

**HR-MS (ESI+)** *m/z*: [M+H]<sup>+</sup> calcd for C<sub>15</sub>H<sub>13</sub>NO, 224.1070; found, 224.1071.

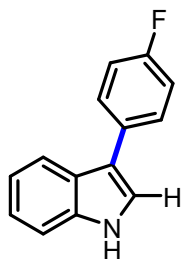

**3-(4-Fluorophenyl)-1H-indole (4ad)**<sup>3</sup>; white solid (46.3 mg, 73%), mp 100 °C.

**<sup>1</sup>H NMR** (500 MHz, Chloroform-*d*) δ 8.20 (s, 1H), 7.90 (dd, *J* = 8.0, 1.0 Hz, 1H), 7.66 – 7.59 (m, 2H), 7.44 (dt, *J* = 8.1, 0.9 Hz, 1H), 7.32 (d, *J* = 2.5 Hz, 1H), 7.28 (ddd, *J* = 8.2, 7.1, 1.2 Hz, 1H), 7.22 (ddd, *J* = 8.0, 7.1, 1.1 Hz, 1H), 7.19 – 7.12 (m, 2H).

**<sup>13</sup>C{<sup>1</sup>H} NMR** (126 MHz, Chloroform-*d*) δ 161.61 (d, *J* = 244.4 Hz), 136.68, 131.66, 129.05, 125.82, 122.19, 120.09, 117.56, 115.73, 111.58.

**<sup>19</sup>F NMR** (471 MHz, Chloroform-*d*) δ -116.84.

**HR-MS (ESI+)** *m/z*: [M+H]<sup>+</sup> calcd for C<sub>14</sub>H<sub>10</sub>FN, 212.0870; found, 212.0876.

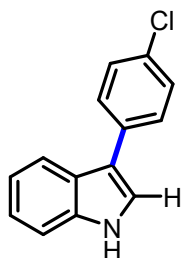

**3-(4-Chlorophenyl)-1H-indole (4ae)**<sup>5</sup>; white solid (49.2 mg, 72%), mp 135 °C.

**<sup>1</sup>H NMR** (500 MHz, DMSO-*d*<sub>6</sub>) δ 11.44 (s, 1H), 7.85 (d, *J* = 7.9 Hz, 1H), 7.75 (d, *J* = 2.2 Hz, 1H), 7.74 – 7.68 (m, 2H), 7.50 – 7.41 (m, 3H), 7.16 (ddd, *J* = 8.1, 7.1, 1.1 Hz, 1H), 7.10 (ddd, *J* = 8.0, 7.0, 1.1 Hz, 1H).

**<sup>13</sup>C{<sup>1</sup>H} NMR** (126 MHz, DMSO-*d*<sub>6</sub>) δ 136.93, 134.83, 129.52, 128.72, 127.98, 124.74, 123.95, 121.59, 119.82, 118.89, 114.36, 112.08.

**HR-MS (ESI+)** *m/z*: [M+H]<sup>+</sup> calcd for C<sub>14</sub>H<sub>10</sub>ClN, 228.0575; found, 228.0580.

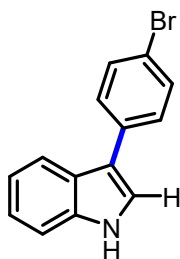

**3-(4-Bromophenyl)-1H-indole (4af)<sup>4</sup>**; white solid (51.4 mg, 63%), mp 135 °C.

**<sup>1</sup>H NMR** (500 MHz, Chloroform-*d*) δ 8.26 (s, 1H), 7.89 (dd, *J* = 8.0, 1.0 Hz, 1H), 7.59 – 7.53 (m, 4H), 7.44 (dt, *J* = 8.1, 0.9 Hz, 1H), 7.37 (d, *J* = 2.6 Hz, 1H), 7.27 (m, 1H), 7.22 (ddd, *J* = 8.1, 7.1, 1.1 Hz, 1H).

**<sup>13</sup>C{<sup>1</sup>H} NMR** (126 MHz, Chloroform-*d*) δ 136.76, 134.63, 131.96, 129.09, 125.57, 122.77, 122.00, 120.70, 119.75, 119.69, 117.35, 111.65.

**HR-MS (ESI+)** *m/z*: [M+H]<sup>+</sup> calcd for C<sub>14</sub>H<sub>10</sub>BrN, 272.0069; found, 272.0071.

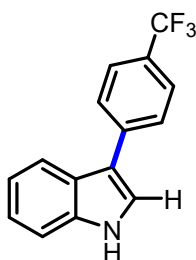

**3-(4-(Trifluoromethyl)phenyl)-1H-indole (4ag)<sup>5</sup>**; white solid (29.8 mg, 38%), mp 130 °C.

**<sup>1</sup>H NMR** (500 MHz, Chloroform-*d*) δ 8.32 (s, 1H), 7.95 (d, *J* = 7.9 Hz, 1H), 7.79 (d, *J* = 8.3 Hz, 2H), 7.70 (d, *J* = 8.2 Hz, 2H), 7.50 – 7.41 (m, 2H), 7.30 (t, *J* = 7.5 Hz, 1H), 7.25 (m, 1H).

**<sup>13</sup>C{<sup>1</sup>H} NMR** (126 MHz, Chloroform-*d*) δ 139.43, 136.84, 127.92 (d, *J* = 32.4 Hz), 127.45, 125.85 (q, *J* = 3.8 Hz), 125.71, 125.54, 123.55, 122.97, 122.69, 120.97, 119.69, 117.24, 111.76.

**<sup>19</sup>F NMR** (471 MHz, Chloroform-*d*) δ -62.06.

**HR-MS (ESI+)** *m/z*: [M+H]<sup>+</sup> calcd for C<sub>15</sub>H<sub>10</sub>F<sub>3</sub>N, 262.0838; found, 262.0845.

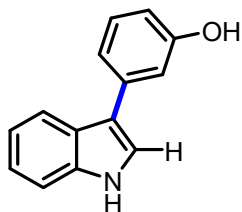

**3-(1*H*-Indol-3-yl)phenol (4ah)**<sup>14</sup>; white solid (42.7 mg, 68%), mp 135-140 °C.

**<sup>1</sup>H NMR** (500 MHz, DMSO-*d*<sub>6</sub>) δ 11.31 (s, 1H), 9.35 (s, 1H), 7.83 (d, *J* = 7.9 Hz, 1H), 7.62 (d, *J* = 2.6 Hz, 1H), 7.44 (d, *J* = 8.0 Hz, 1H), 7.21 (t, *J* = 7.8 Hz, 1H), 7.16 – 7.04 (m, 4H), 6.63 (ddd, *J* = 8.0, 2.3, 1.0 Hz, 1H).

**<sup>13</sup>C{<sup>1</sup>H} NMR** (126 MHz, DMSO-*d*<sub>6</sub>) δ 157.68, 137.09, 136.89, 129.70, 125.01, 123.31, 121.38, 119.53, 119.05, 117.43, 115.81, 113.33, 112.37, 111.99.

**HR-MS (ESI+)** *m/z*: [M+H]<sup>+</sup> calcd for C<sub>14</sub>H<sub>11</sub>NO, 210.0913; found, 210.0885.

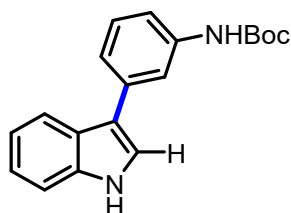

**tert-Butyl(3-(1*H*-indol-3-yl)phenyl)carbamate (4ai)**; colorless oil (57.4 mg, 62%).

**<sup>1</sup>H NMR** (500 MHz, DMSO-*d*<sub>6</sub>) δ 11.34 (s, 1H), 9.38 (s, 1H), 7.90 (dt, *J* = 8.0, 0.9 Hz, 1H), 7.83 (d, *J* = 2.2 Hz, 1H), 7.63 (d, *J* = 2.6 Hz, 1H), 7.44 (dt, *J* = 8.1, 1.0 Hz, 1H), 7.37 (m, 1H), 7.31 – 7.24 (m, 2H), 7.15 (ddd, *J* = 8.2, 7.0, 1.2 Hz, 1H), 7.09 (ddd, *J* = 8.0, 7.0, 1.2 Hz, 1H), 1.49 (s, 9H).

**<sup>13</sup>C{<sup>1</sup>H} NMR** (126 MHz, DMSO-*d*<sub>6</sub>) δ 152.88, 139.91, 136.91, 136.18, 128.99, 124.96, 123.34, 121.43, 120.34, 119.56, 119.18, 116.20, 115.69, 115.07, 111.98, 78.93, 28.19.

**HR-MS (ESI+)** *m/z*: [M+H]<sup>+</sup> calcd for C<sub>19</sub>H<sub>20</sub>N<sub>2</sub>O<sub>2</sub>, 309.1598; found, 309.1544.

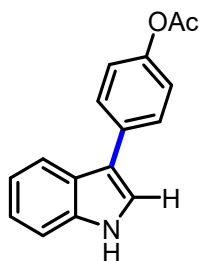

**4-(1*H*-Indol-3-yl)phenyl acetate (4aj)**; white solid (58.8 mg, 78%), mp 226 °C.

**<sup>1</sup>H NMR** (500 MHz, DMSO-*d*<sub>6</sub>) δ 11.38 (s, 1H), 7.86 (d, *J* = 7.9 Hz, 1H), 7.73 – 7.68 (m, 3H), 7.46 (d, *J* = 8.0 Hz, 1H), 7.21 – 7.14 (m, 3H), 7.10 (ddd, *J* = 8.0, 7.1, 1.0 Hz, 1H), 2.29 (s, 3H).

**<sup>13</sup>C{<sup>1</sup>H} NMR** (126 MHz, DMSO-*d*<sub>6</sub>) δ 169.45, 148.18, 136.87, 133.53, 127.29, 124.89, 123.58, 122.16, 121.49, 119.68, 118.90, 114.89, 112.02, 20.92.

**HR-MS (ESI+)** *m/z*: [M+H]<sup>+</sup> calcd for C<sub>16</sub>H<sub>13</sub>NO<sub>2</sub>, 252.1019; found, 252.0966.

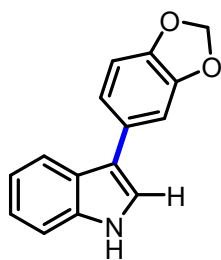

**3-(Benzo[*d*][1,3]dioxol-5-yl)-1*H*-indole (4ak)**<sup>3</sup>; white solid (37.0 mg, 52%), mp 155 °C.

**<sup>1</sup>H NMR** (500 MHz, Chloroform-*d*) δ 8.17 (s, 1H), 7.90 (d, *J* = 7.9 Hz, 1H), 7.42 (d, *J* = 8.1 Hz, 1H), 7.30 – 7.23 (m, 2H), 7.20 (t, *J* = 7.5 Hz, 1H), 7.17 – 7.13 (m, 2H), 6.92 (d, *J* = 7.8 Hz, 1H), 6.01 (s, 2H).

**<sup>13</sup>C{<sup>1</sup>H} NMR** (126 MHz, Chloroform-*d*) δ 148.07, 146.08, 136.66, 129.68, 125.88, 122.54, 121.49, 120.85, 120.38, 119.79, 118.30, 111.51, 108.83, 108.35, 101.06.

**HR-MS (ESI+)** *m/z*: [M+H]<sup>+</sup> calcd for C<sub>15</sub>H<sub>11</sub>NO<sub>2</sub>, 238.0863; found, 238.0869.

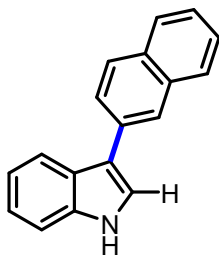

**3-(Naphthalen-2-yl)-1H-indole (4al)<sup>15</sup>**; white solid (56.2 mg, 77%), mp 140-145 °C.

**<sup>1</sup>H NMR** (500 MHz, DMSO-*d*<sub>6</sub>) δ 11.48 (s, 1H), 8.22 (m, 1H), 8.07 (d, *J* = 7.6 Hz, 1H), 8.01 – 7.92 (m, 2H), 7.92 – 7.85 (m, 3H), 7.54 – 7.41 (m, 3H), 7.23 – 7.12 (m, 2H).

**<sup>13</sup>C{<sup>1</sup>H} NMR** (126 MHz, DMSO-*d*<sub>6</sub>) δ 137.11, 133.78, 133.54, 131.27, 128.15, 127.67, 127.51, 126.18, 125.98, 125.06, 125.03, 124.24, 123.45, 121.63, 119.84, 119.36, 115.48, 112.10.

**HR-MS (ESI+)** *m/z*: [M+H]<sup>+</sup> calcd for C<sub>18</sub>H<sub>13</sub>N, 244.1121; found, 244.1097.

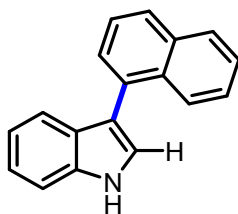

**3-(Naphthalen-1-yl)-1H-indole (4am)<sup>12</sup>**; colorless oil (59.8 mg, 82%)

**<sup>1</sup>H NMR** (500 MHz, DMSO-*d*<sub>6</sub>) δ 11.46 (s, 1H), 8.03 – 7.96 (m, 2H), 7.90 (m, 1H), 7.62 – 7.49 (m, 5H), 7.45 (ddd, *J* = 8.3, 6.7, 1.4 Hz, 1H), 7.31 (m, 1H), 7.17 (ddd, *J* = 8.1, 6.9, 1.2 Hz, 1H), 7.01 (ddd, *J* = 7.9, 6.9, 1.0 Hz, 1H).

**<sup>13</sup>C{<sup>1</sup>H} NMR** (126 MHz, Chloroform-*d*) δ 136.17, 134.09, 133.06, 132.66, 128.38, 127.86, 127.80, 127.28, 126.68, 125.85, 125.83, 125.73, 123.68, 122.50, 120.45, 120.15, 116.67, 111.40.

**HR-MS (ESI+)** *m/z*: [M+H]<sup>+</sup> calcd for C<sub>18</sub>H<sub>13</sub>N, 244.1121; found, 244.1127.



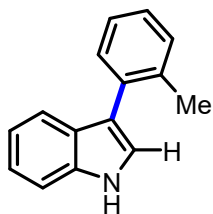

**3-(o-Tolyl)-1H-indole (4an)<sup>3</sup>**; a light yellow oil (57.2 mg, 92%)

**<sup>1</sup>H NMR** (500 MHz, Chloroform-*d*) δ 8.15 (s, 1H), 7.59 (m, 1H), 7.49 (m, 1H), 7.46 (dt, *J* = 8.2, 0.8 Hz, 1H), 7.38 (m, 1H), 7.34 – 7.27 (m, 3H), 7.22 – 7.18 (m, 2H), 2.38 (s, 3H).

**<sup>13</sup>C{<sup>1</sup>H} NMR** (126 MHz, Chloroform-*d*) δ 137.00, 135.96, 134.56, 131.00, 130.48, 127.24, 126.89, 125.76, 122.92, 122.29, 120.23, 120.04, 117.57, 111.32, 20.85.

**H-MS (EI)** *m/z*: [M] calcd for C<sub>15</sub>H<sub>13</sub>N, 207.1048; found, 207.1048.

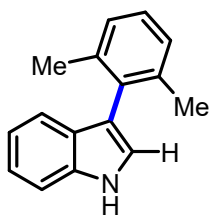

**3-(2,6-Dimethylphenyl)-1H-indole (4ao)**; white solid (21.2 mg, 32%), mp 115 °C.

**<sup>1</sup>H NMR** (500 MHz, DMSO-*d*<sub>6</sub>) δ 11.20 (s, 1H), 7.44 (dt, *J* = 8.1, 0.8 Hz, 1H), 7.25 (d, *J* = 2.4 Hz, 1H), 7.18 – 7.07 (m, 4H), 7.02 (d, *J* = 7.4 Hz, 1H), 6.95 (ddd, *J* = 7.9, 6.9, 1.0 Hz, 1H), 2.01 (s, 6H).

**<sup>13</sup>C{<sup>1</sup>H} NMR** (126 MHz, DMSO-*d*<sub>6</sub>) δ 137.57, 136.09, 134.30, 127.14, 126.66, 126.53, 123.58, 120.97, 118.86, 118.69, 113.50, 111.69, 20.74.

**HR-MS (ESI<sup>+</sup>)** *m/z*: [M+H]<sup>+</sup> calcd for C<sub>16</sub>H<sub>15</sub>N, 222.1277; found, 222.1250.

## 6. Compounds Characterization Data

### 2-Phenyl-1H-indole (3aa);

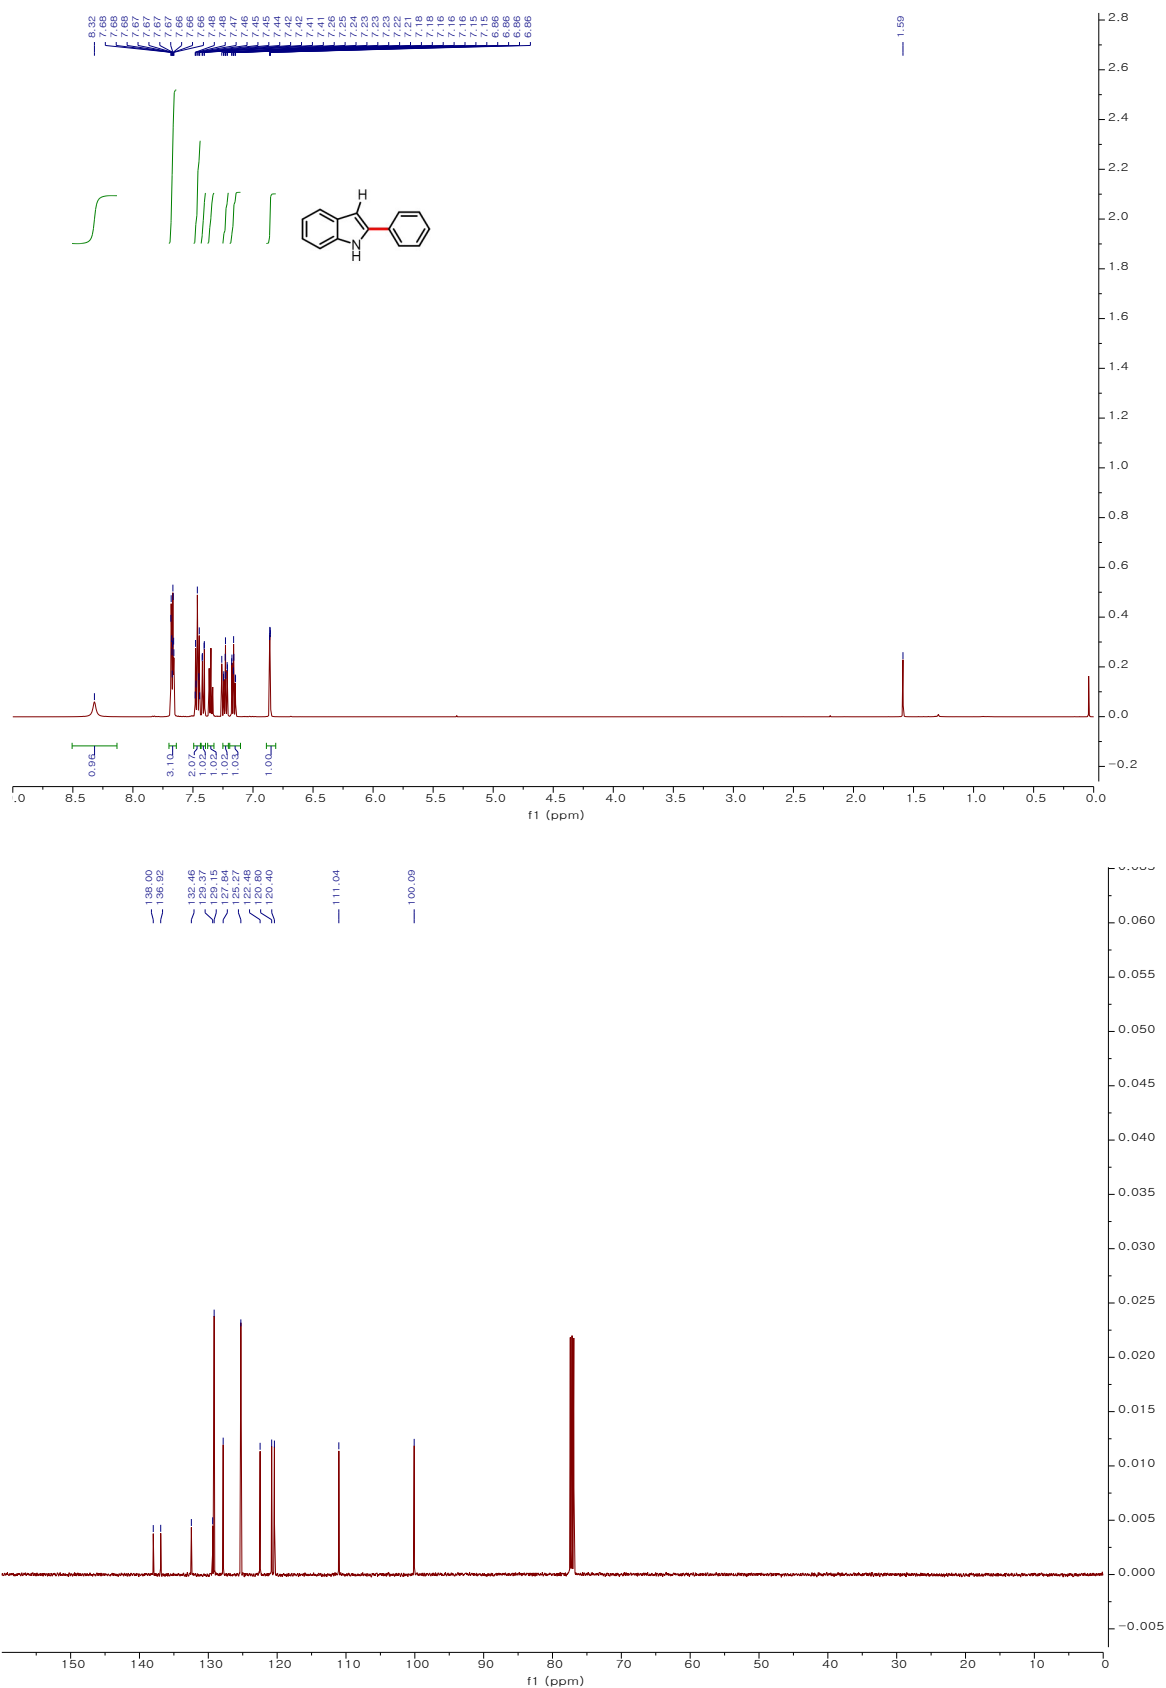



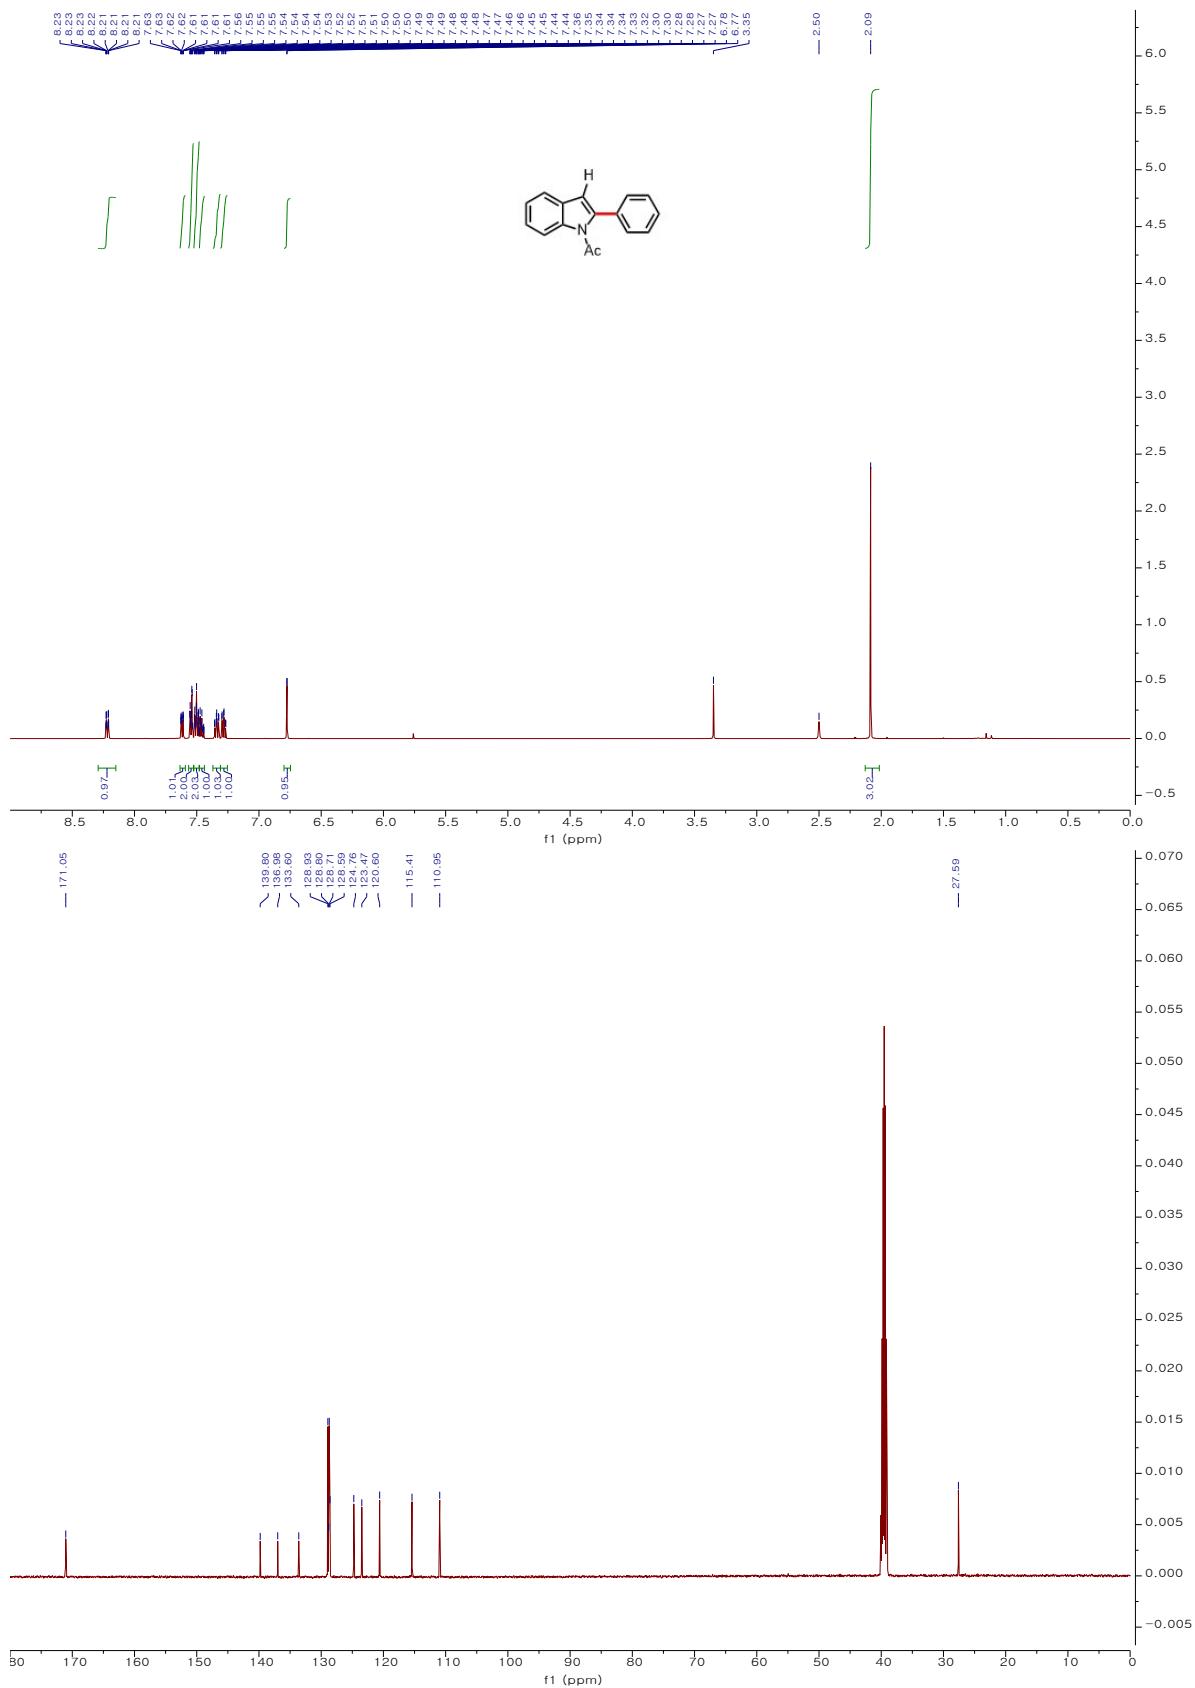

**5-Methyl-2-phenyl-1H-indole (3da);**

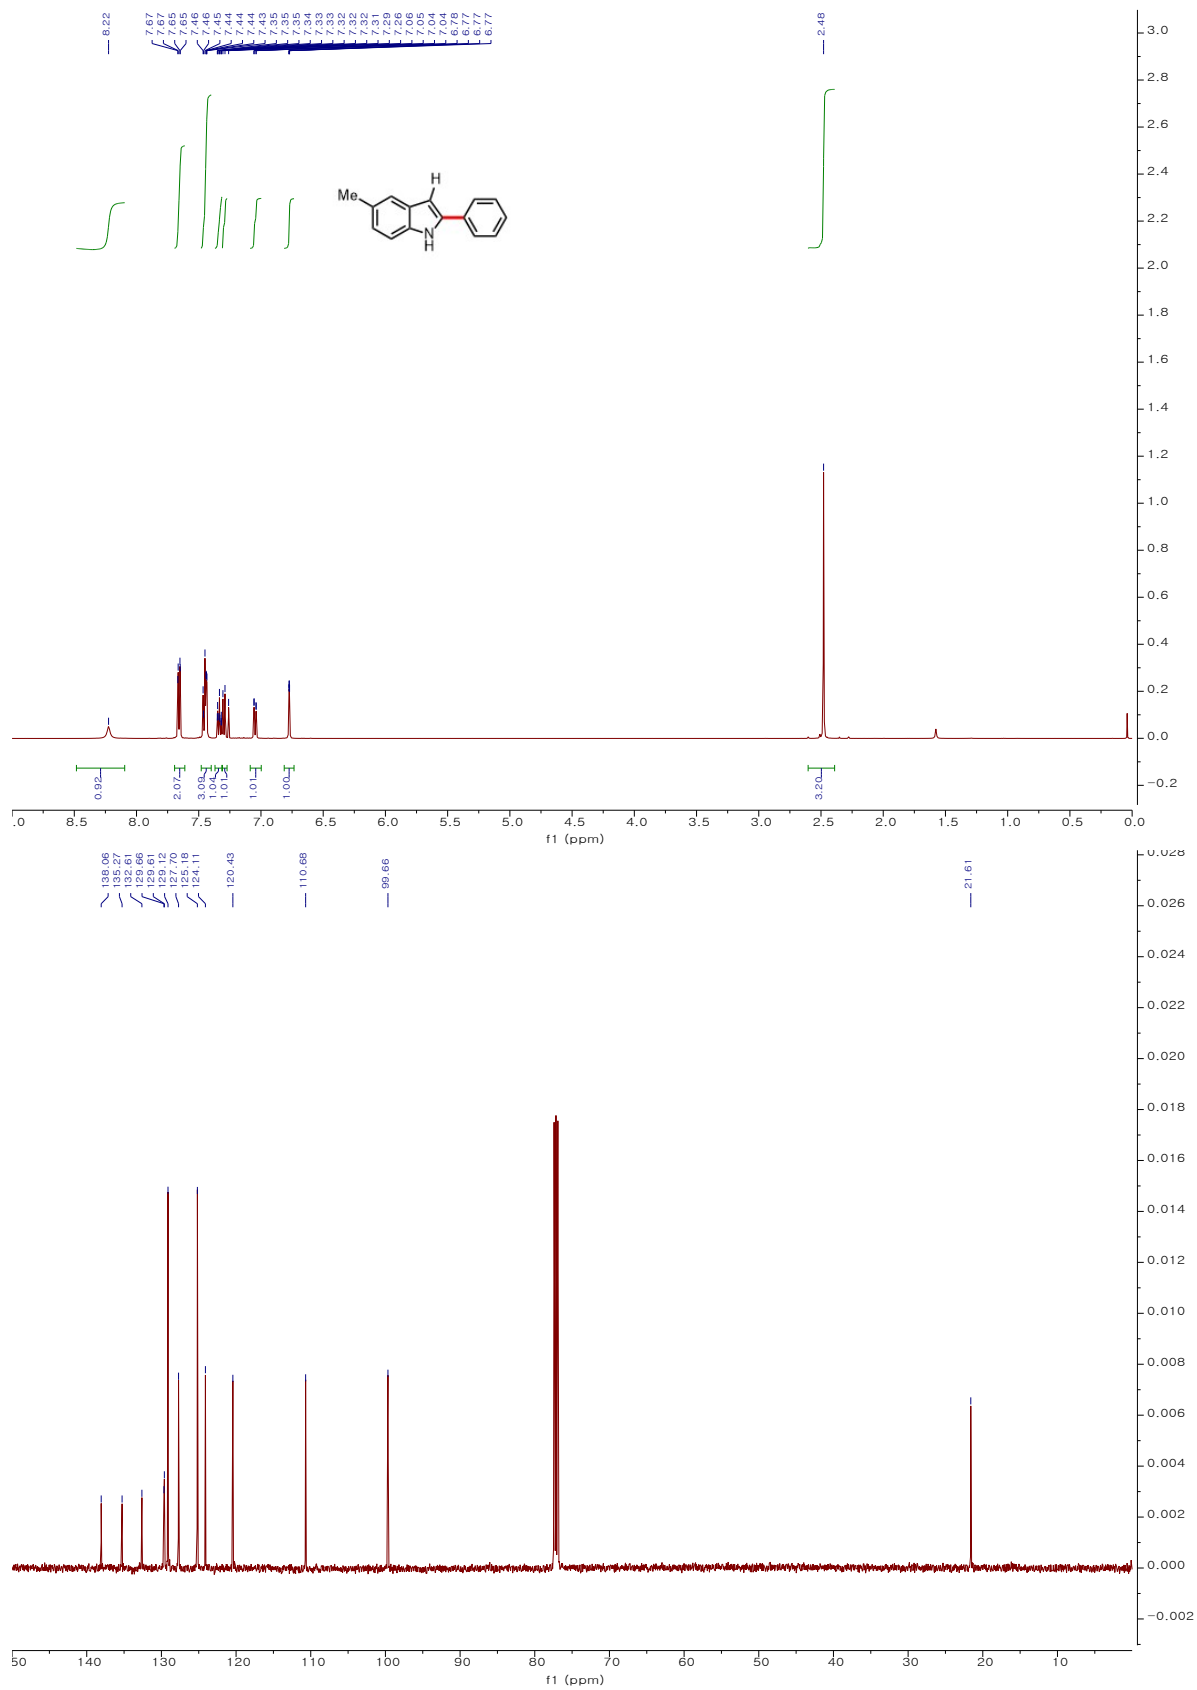

**2-Phenyl-1H-indol-5-yl (3ea);**

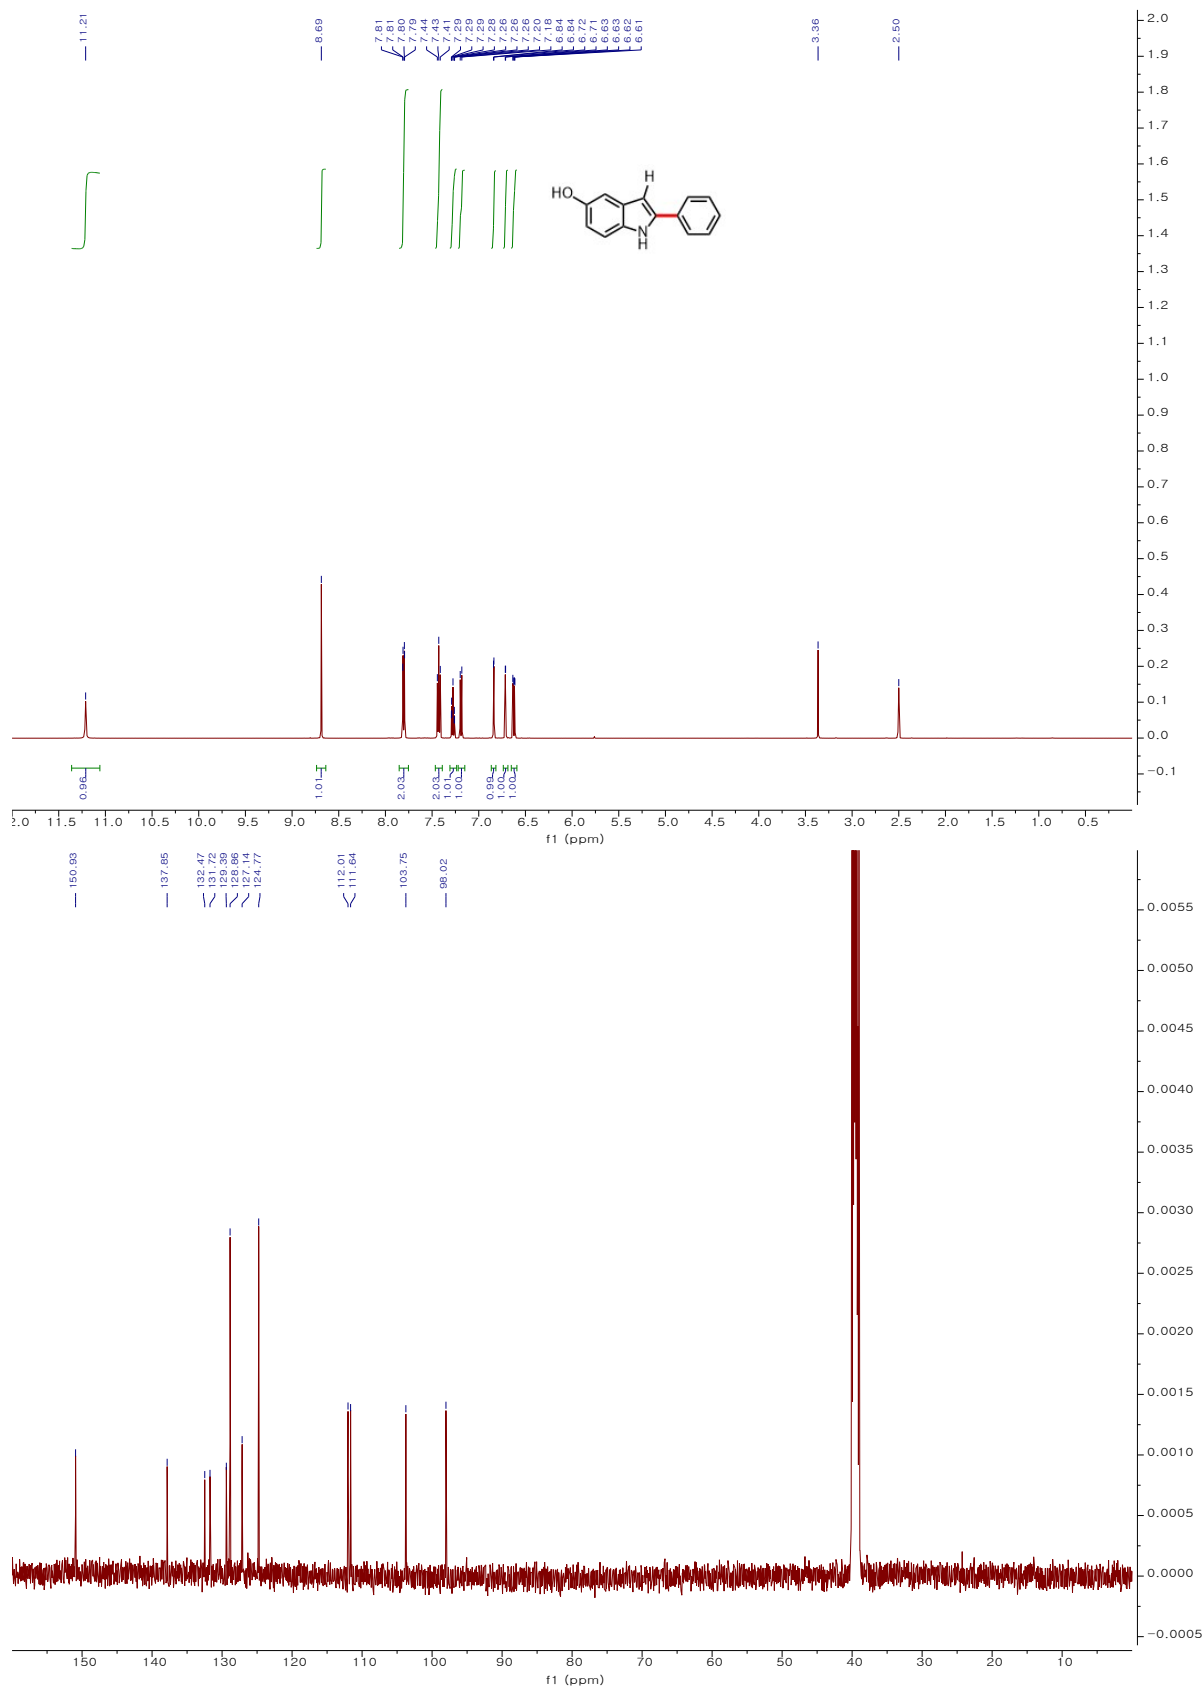

**5-Methoxy-2-phenyl-1H-indole (3fa);**

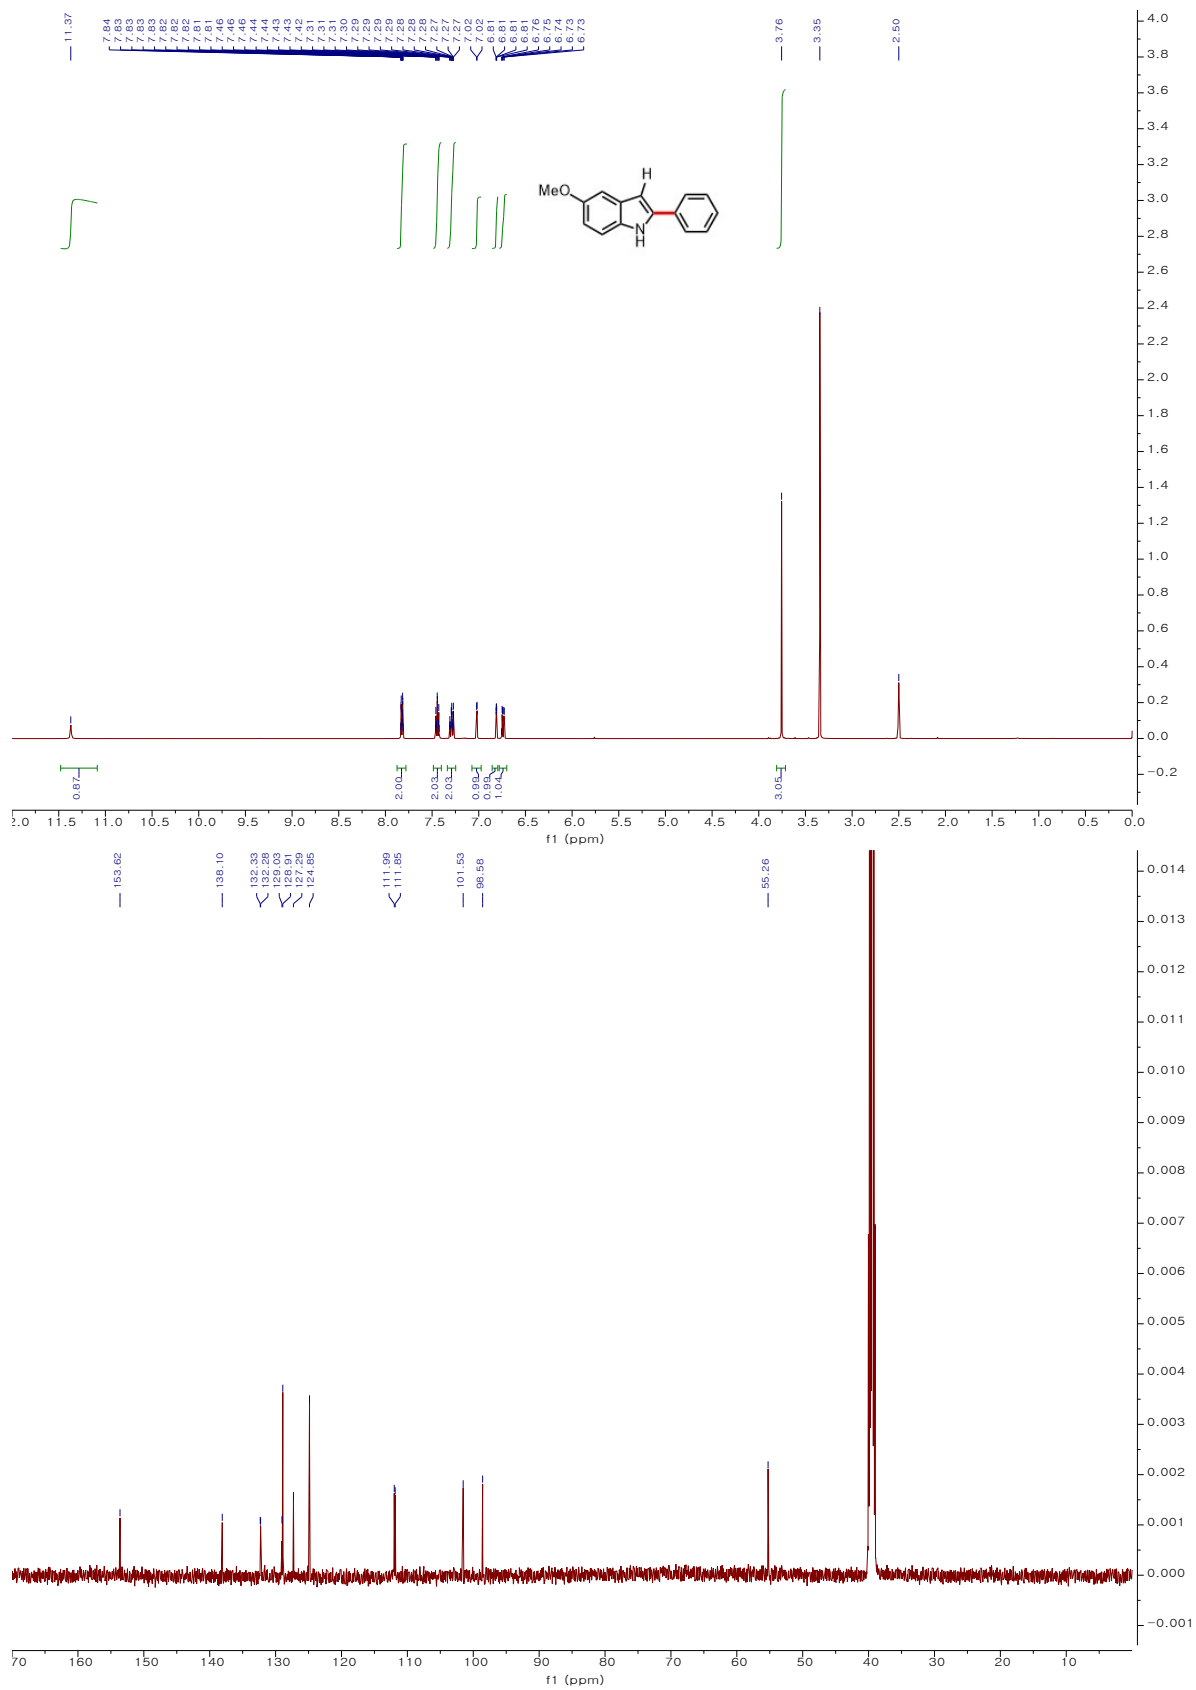

**4-Methoxy-2-phenyl-1H-indole (3ga);**

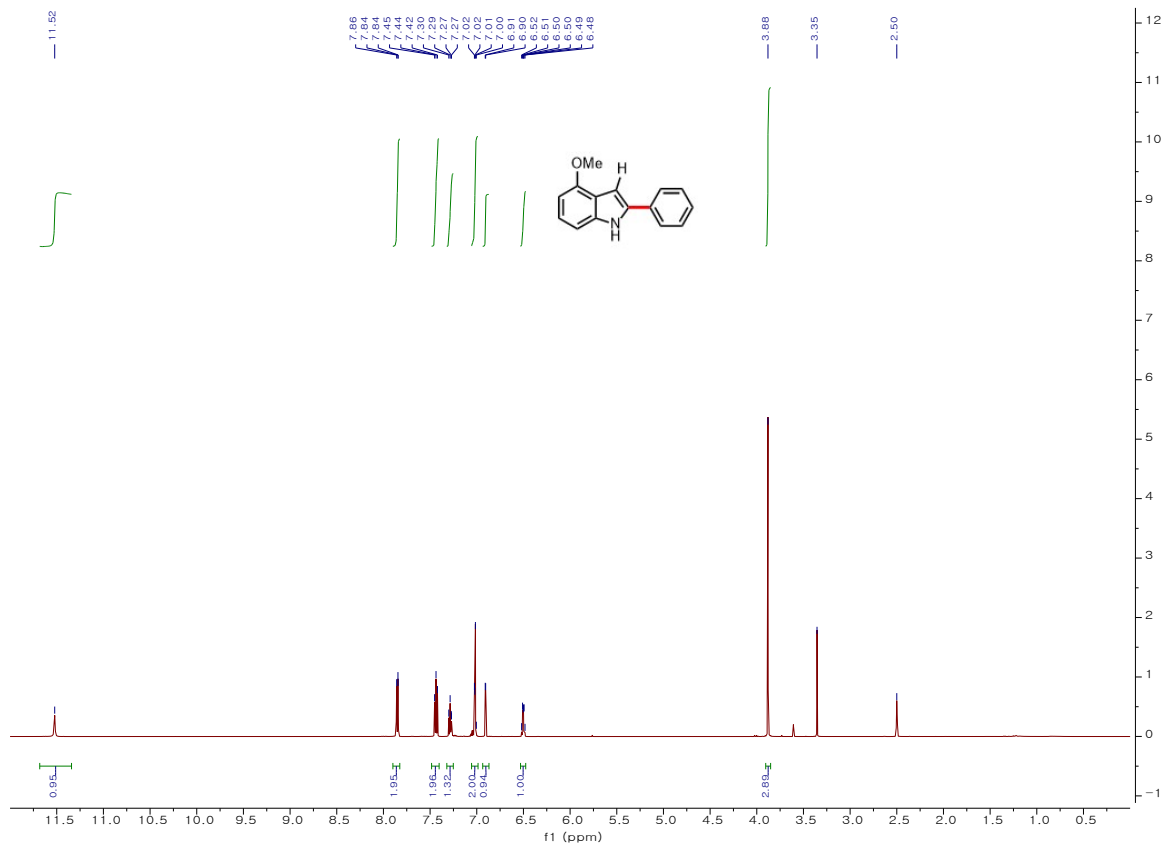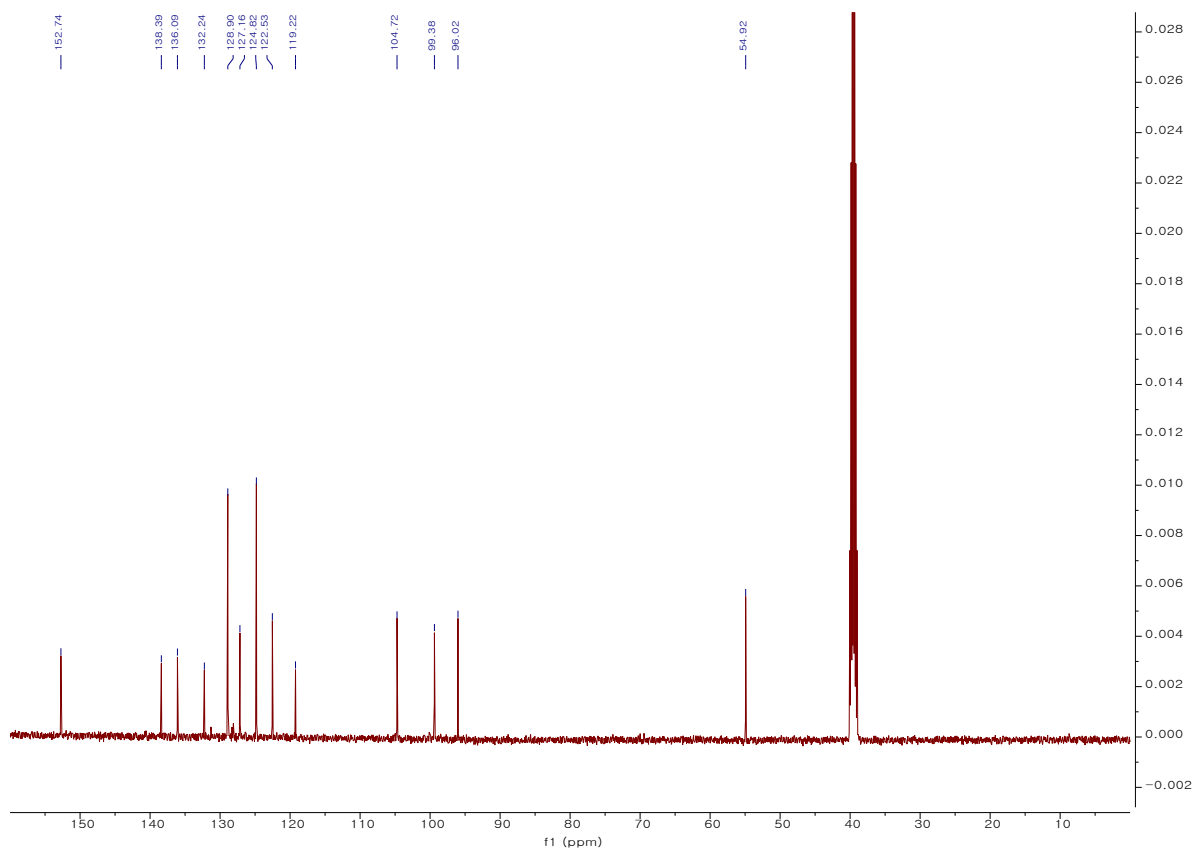

**2-Phenyl-1H-indol-5-yl acetate (3ha);**



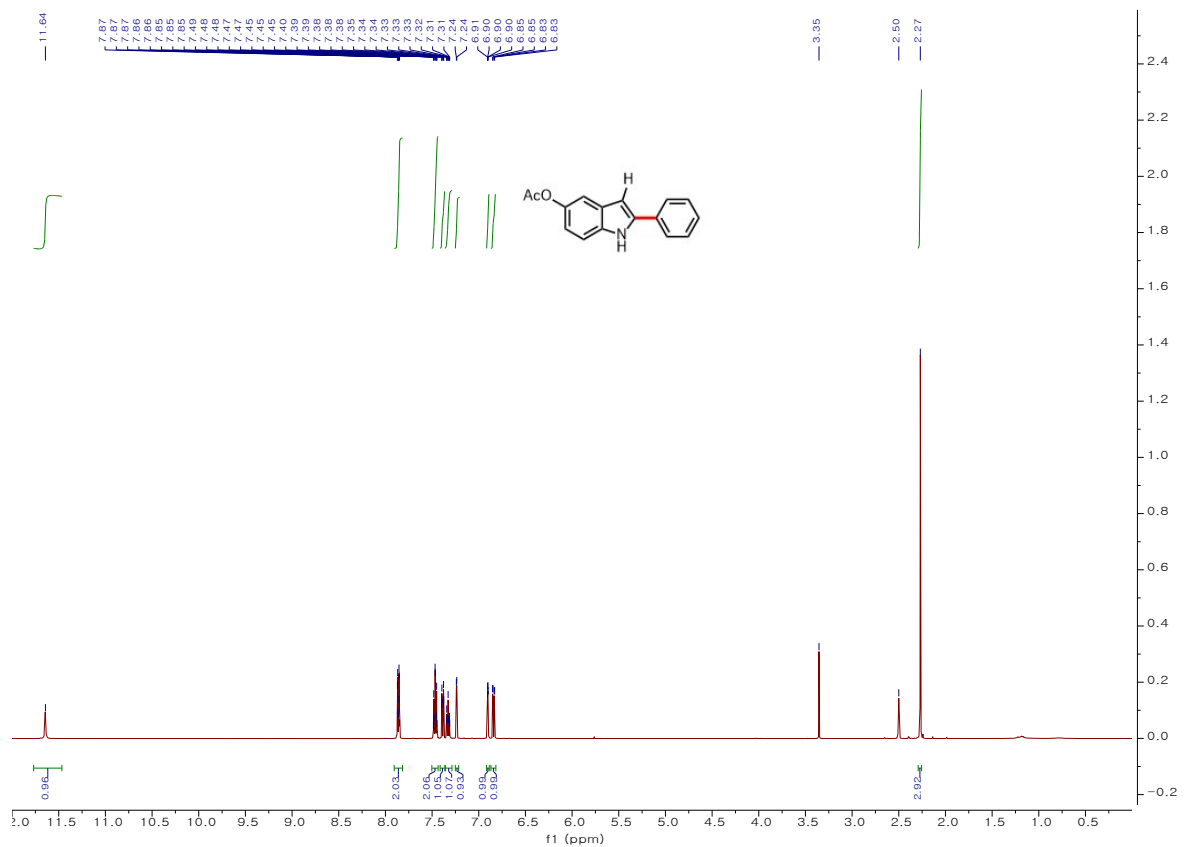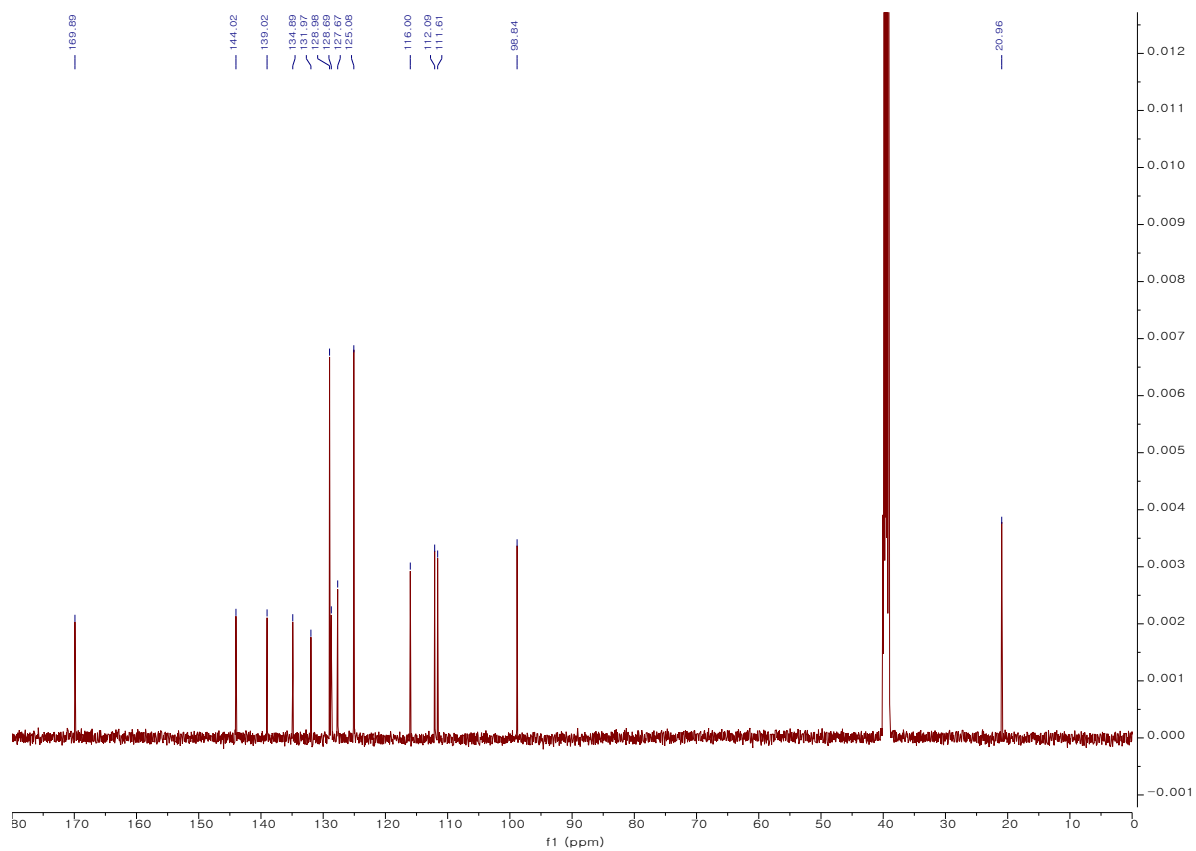

Methyl 2-phenyl-1H-indole-5-carboxylate (3ia);

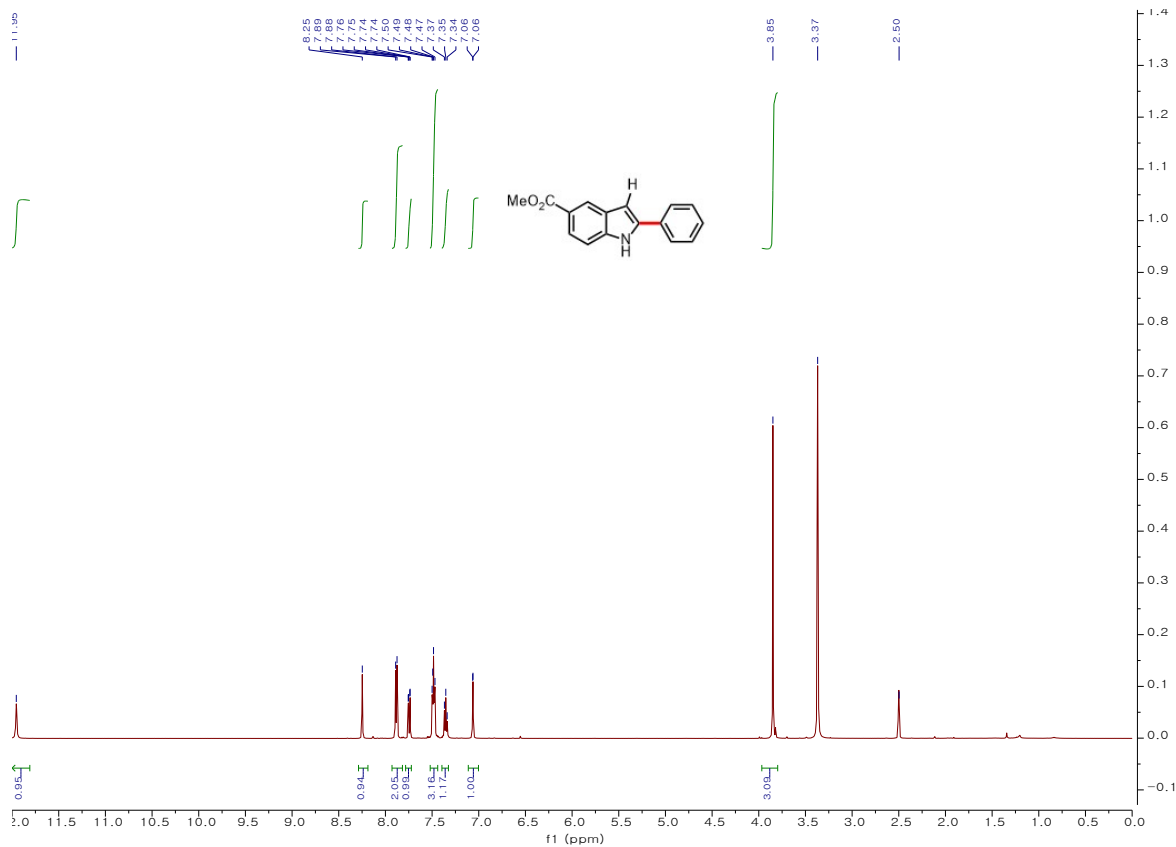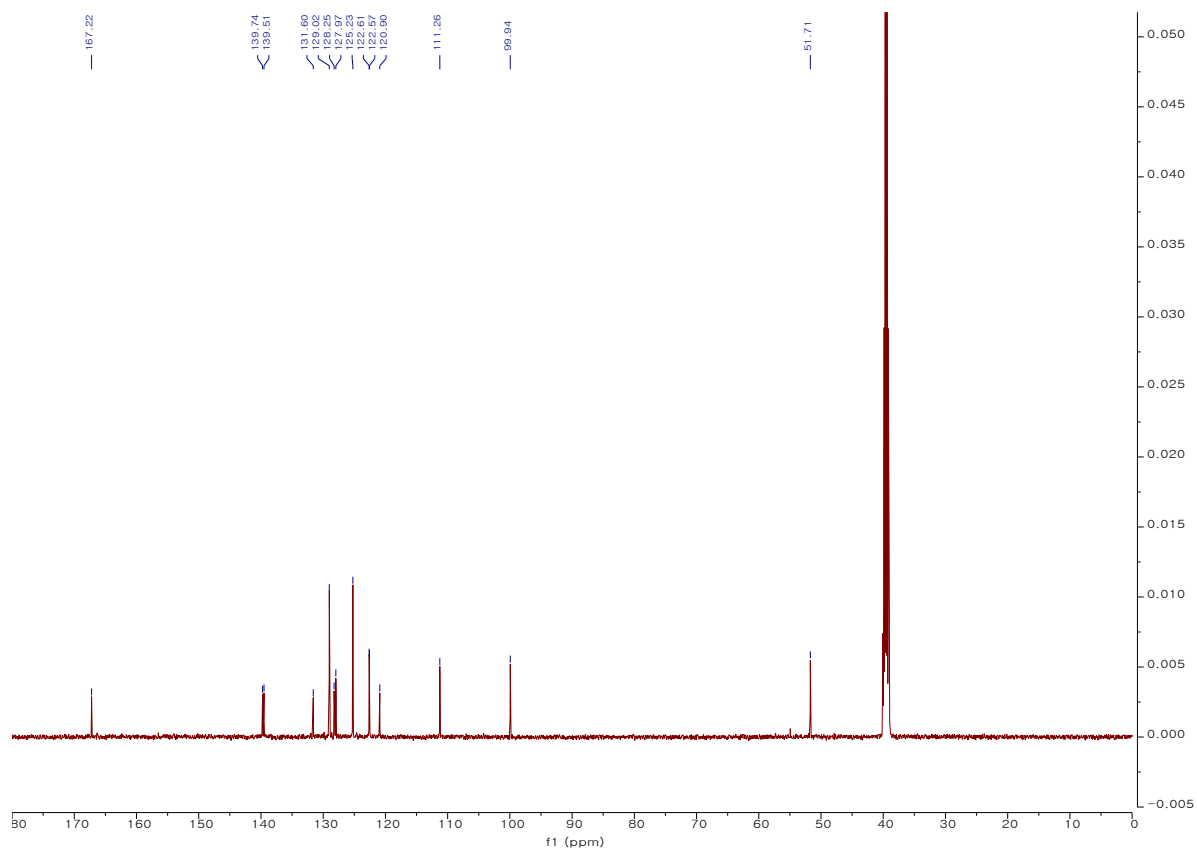

**tert-Butyl (2-phenyl-1H-indol-5-yl)carbamate (3ja);**

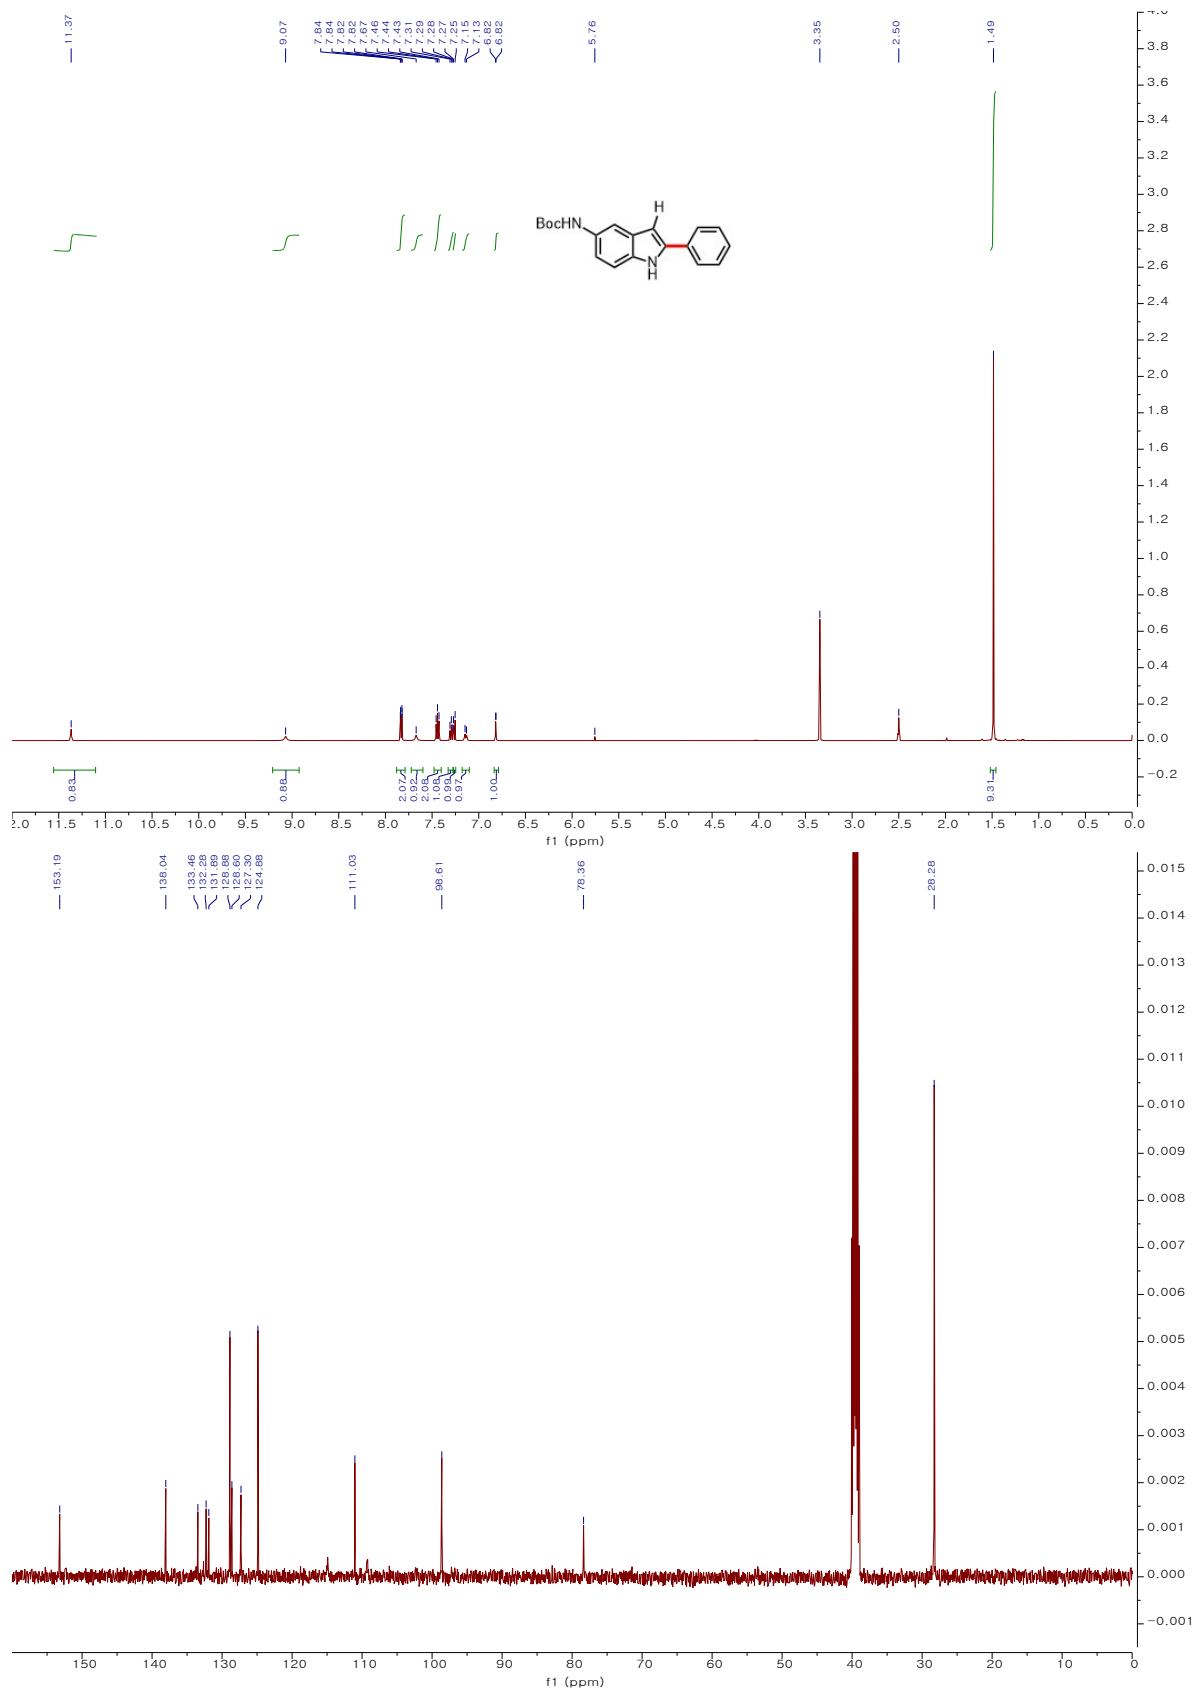

**5-Fluoro-2-phenyl-1H-indole (3ka);**

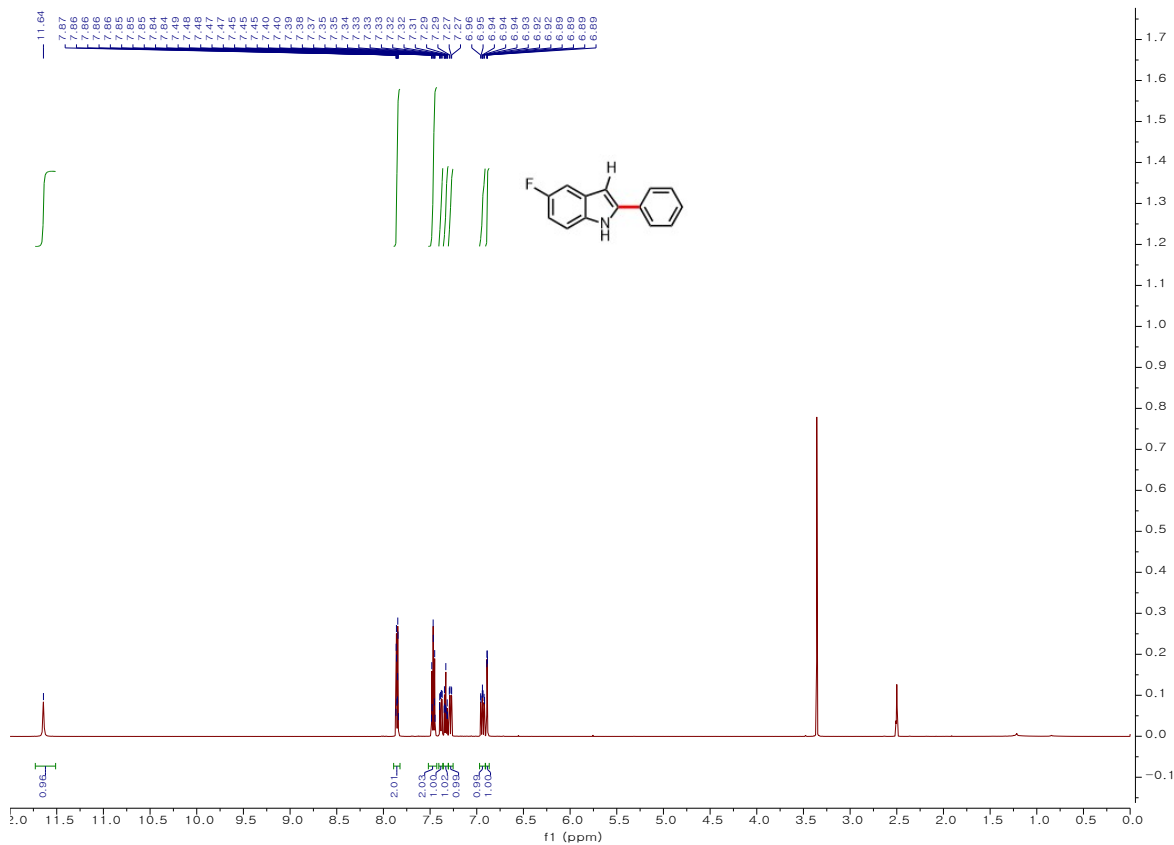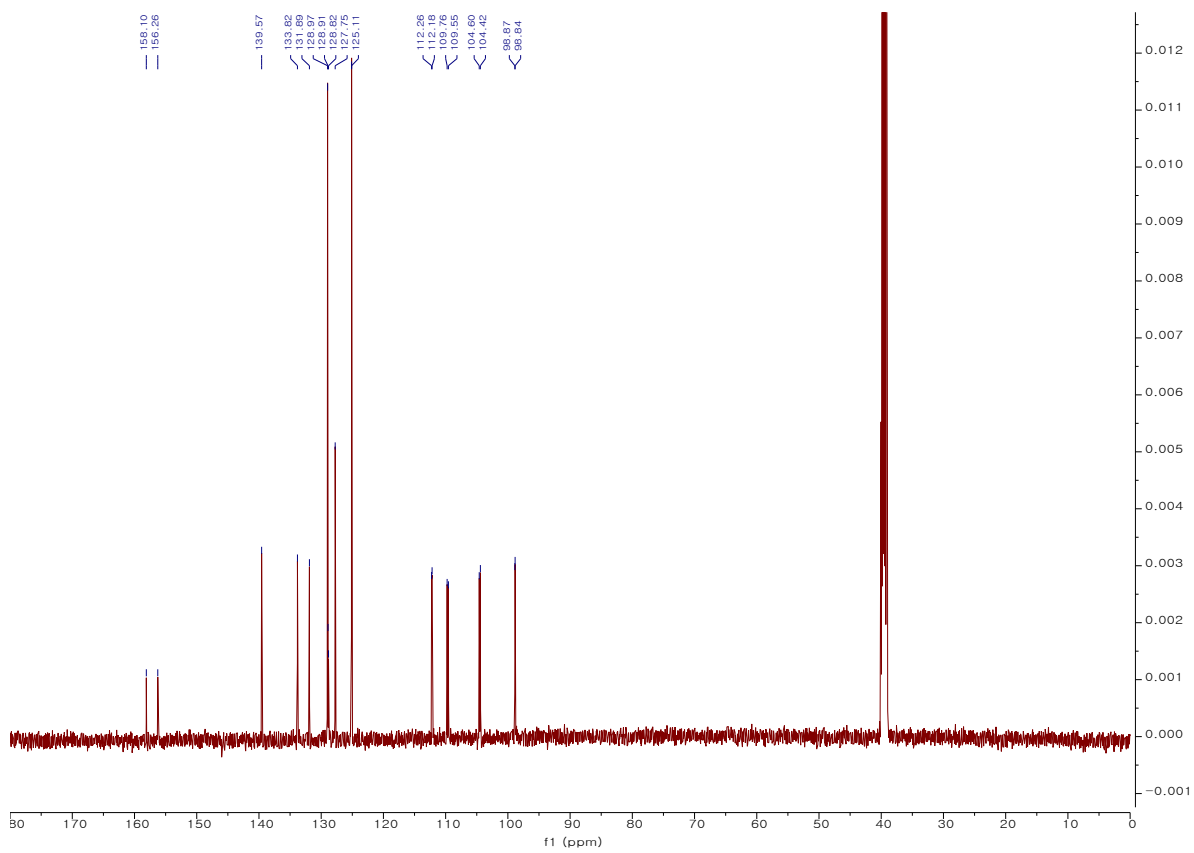

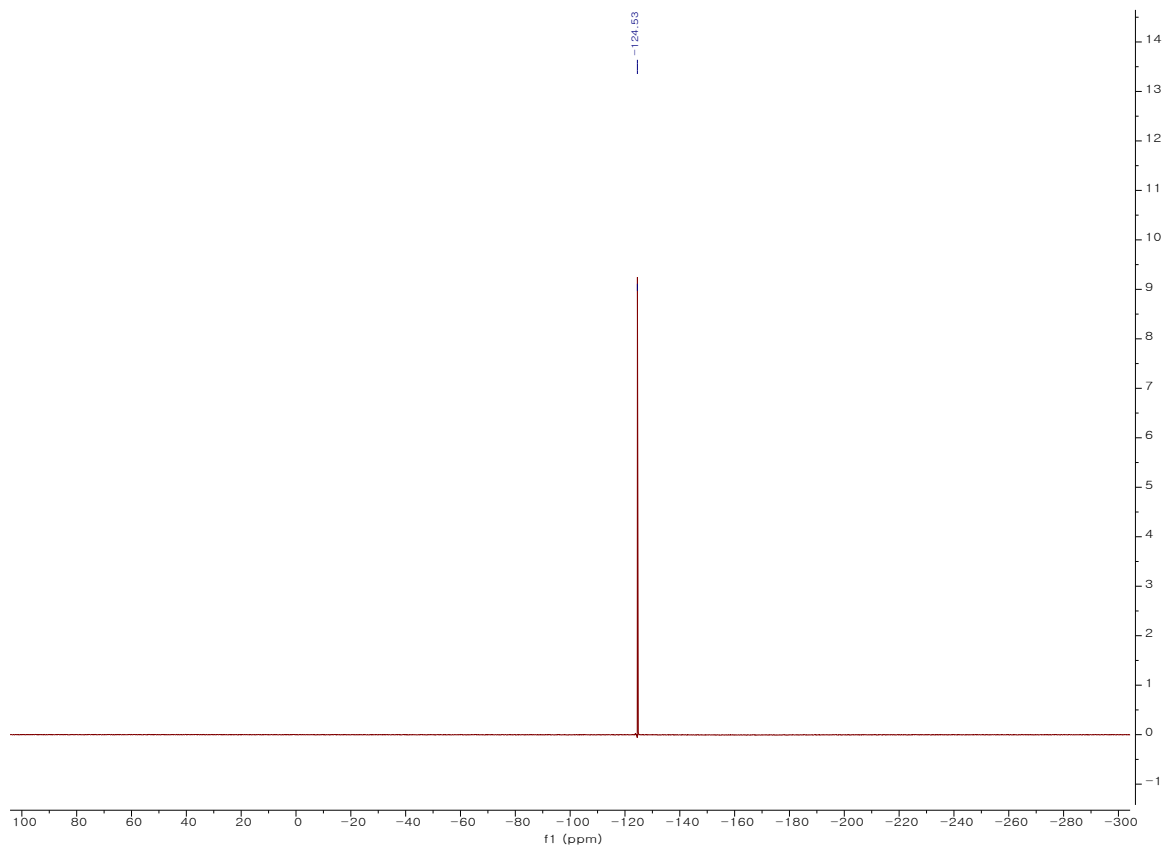

**5-Chloro-2-phenyl-1H-indole (3la);**

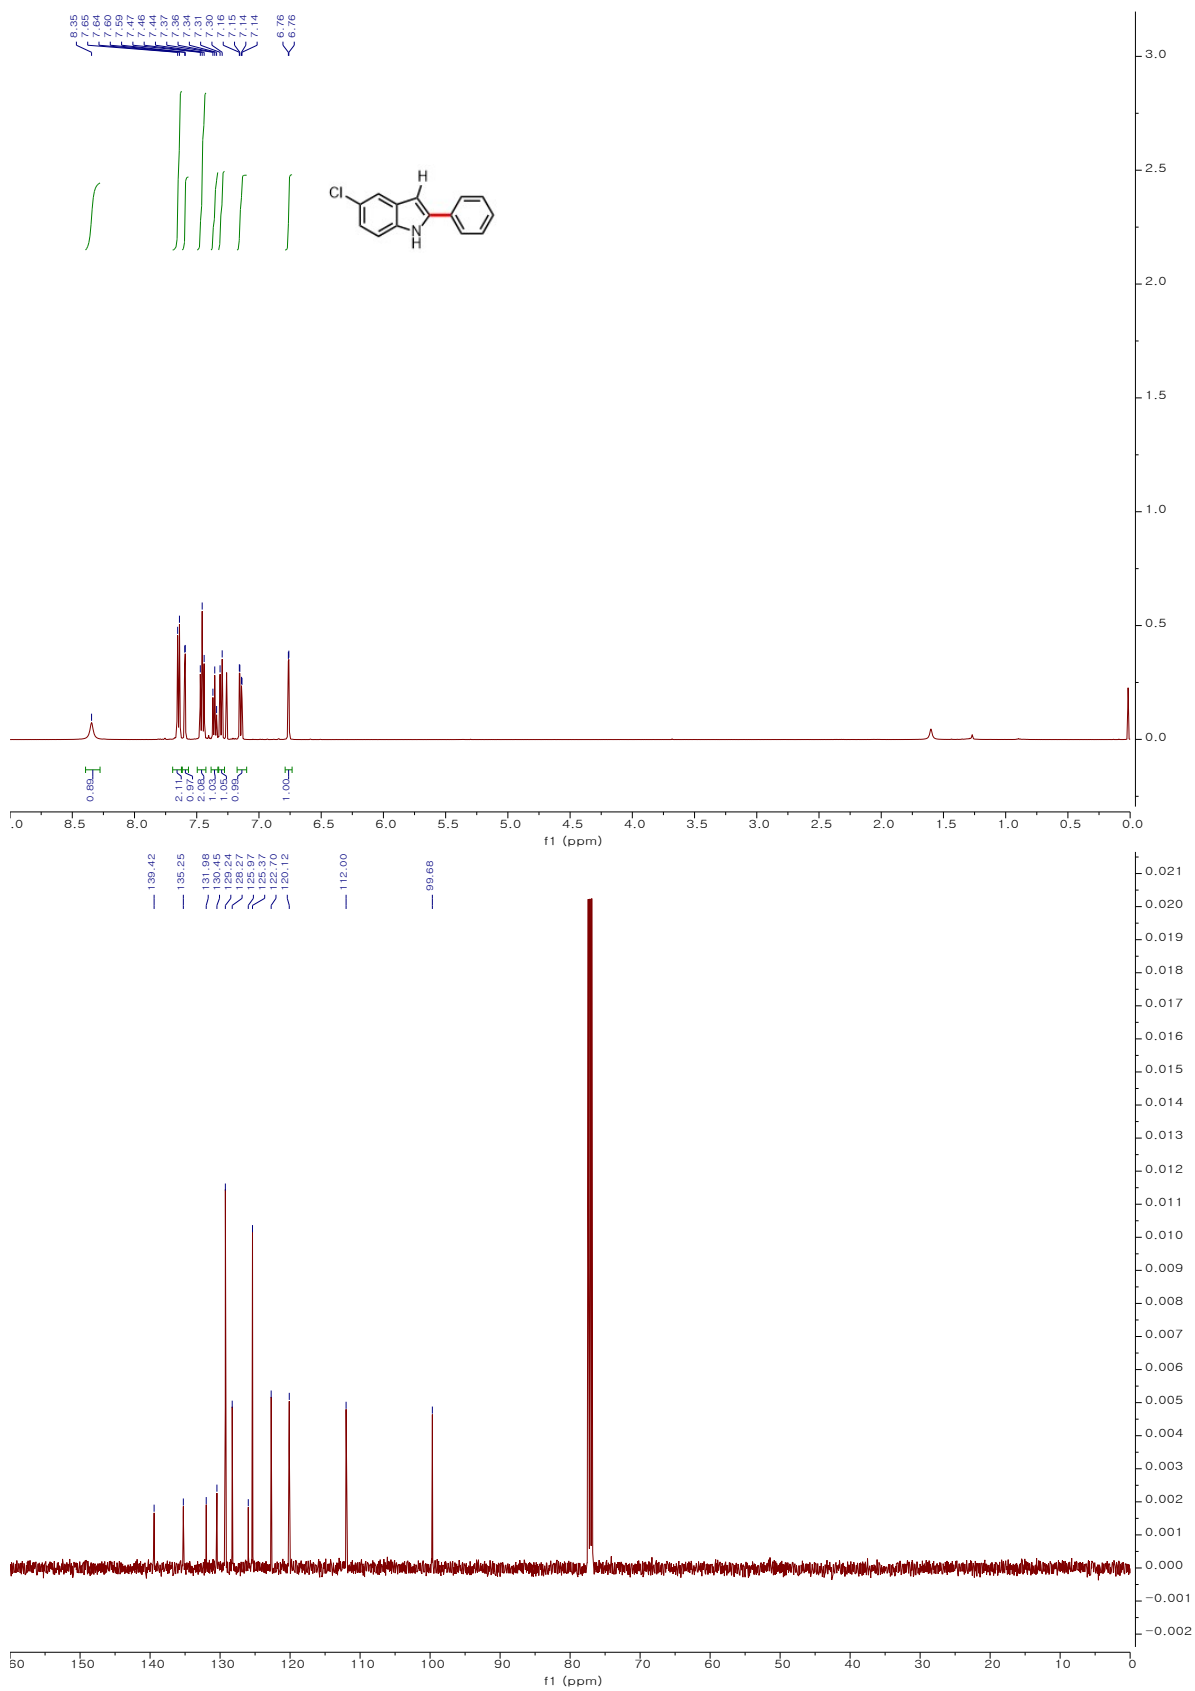

**5-Bromo-2-phenyl-1H-indole (3ma);**

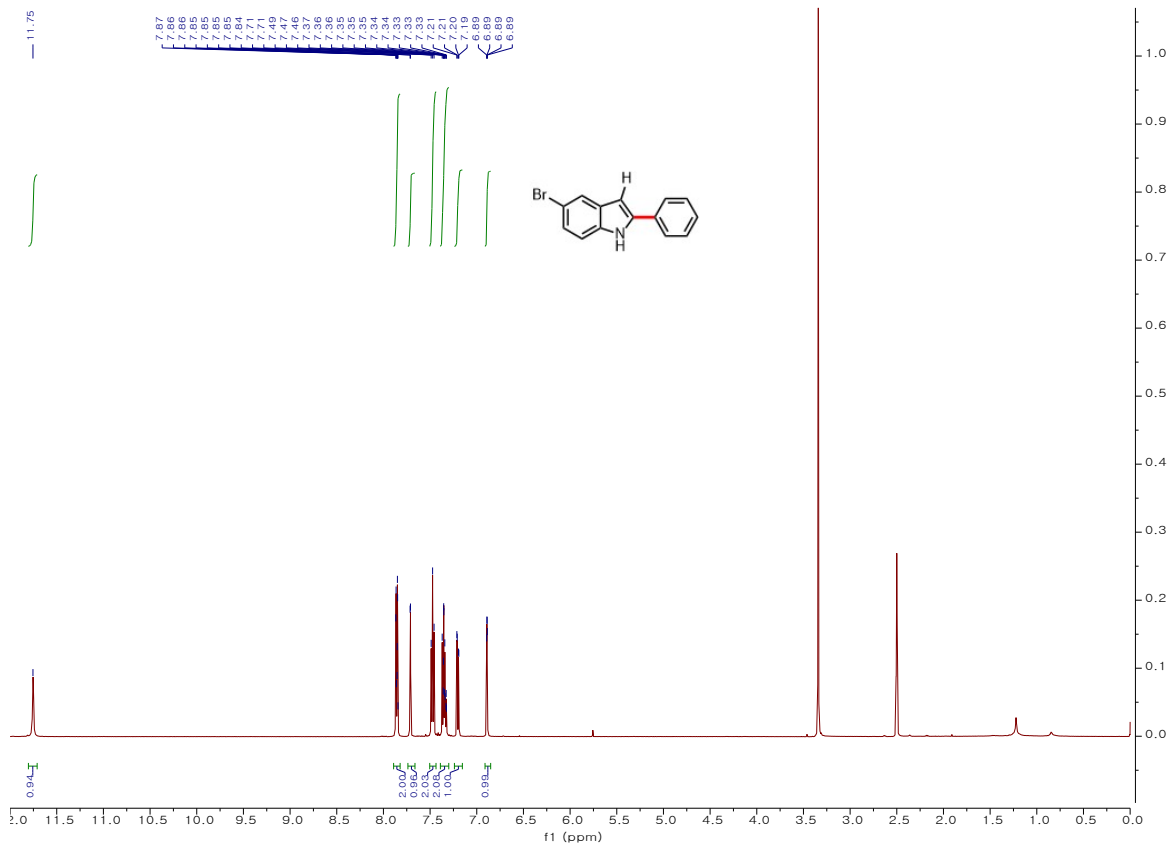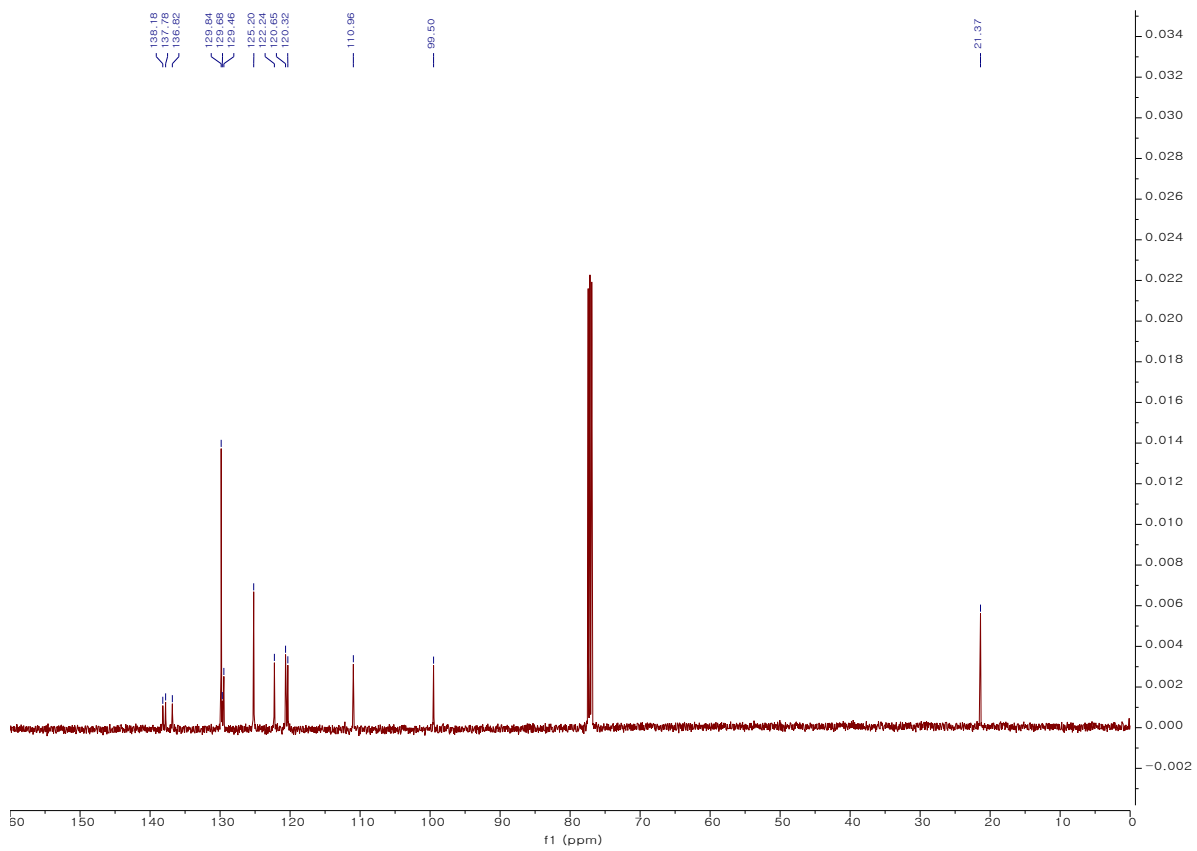

1,3-Diphenyl-1H-indole(3na');





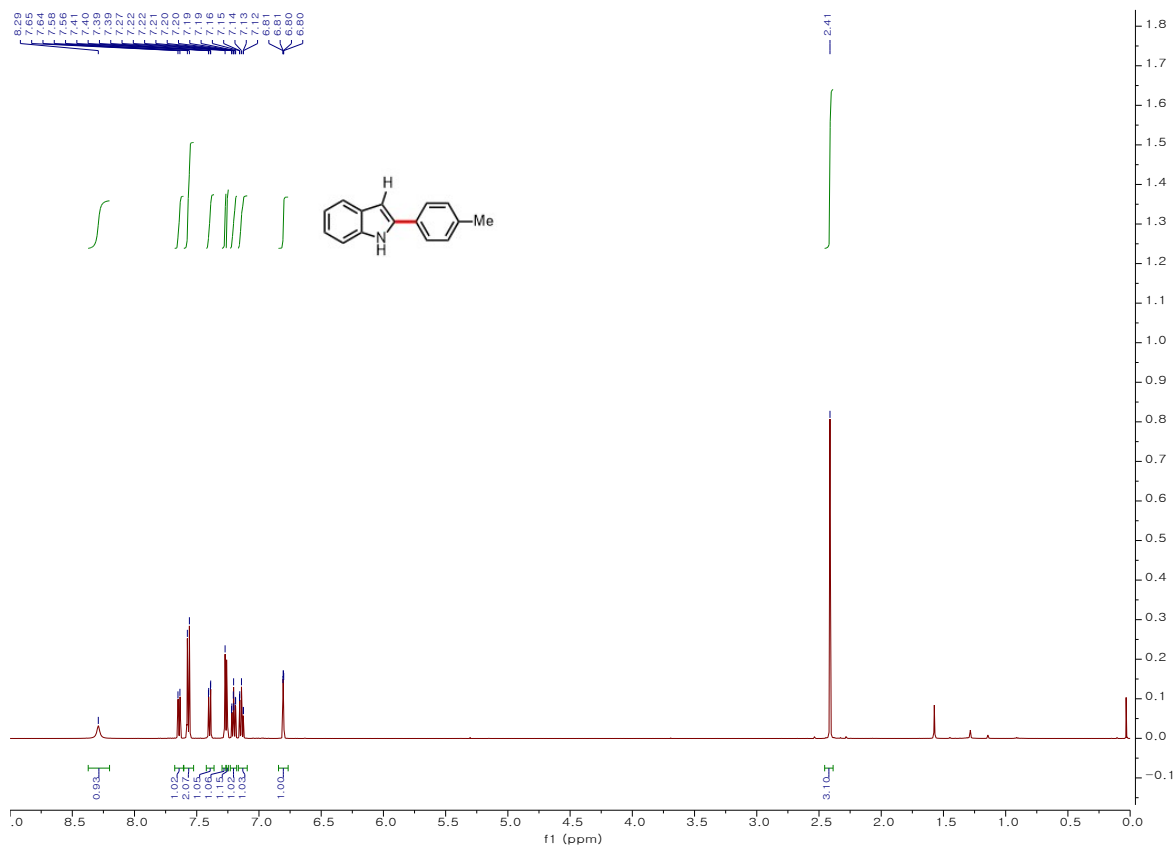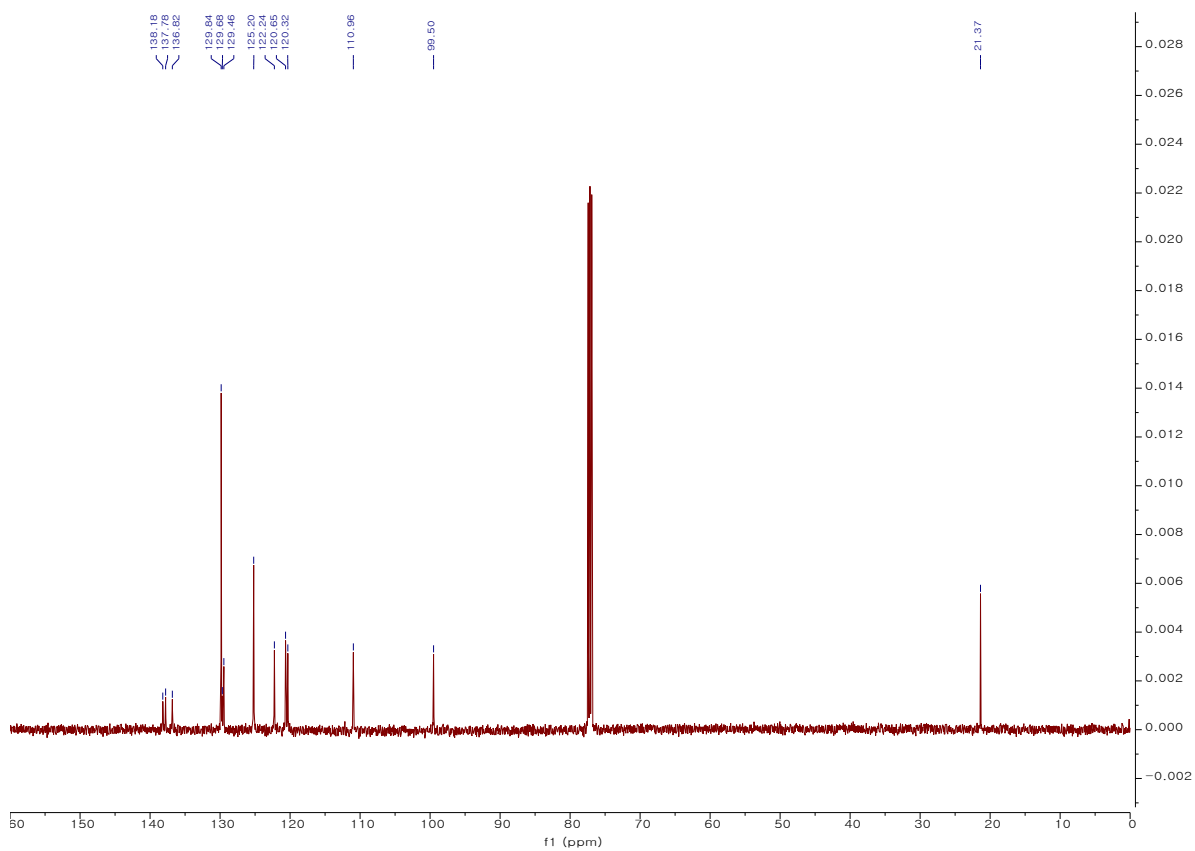

**2-(4-Methoxyphenyl)-1H-indole (3ac);**

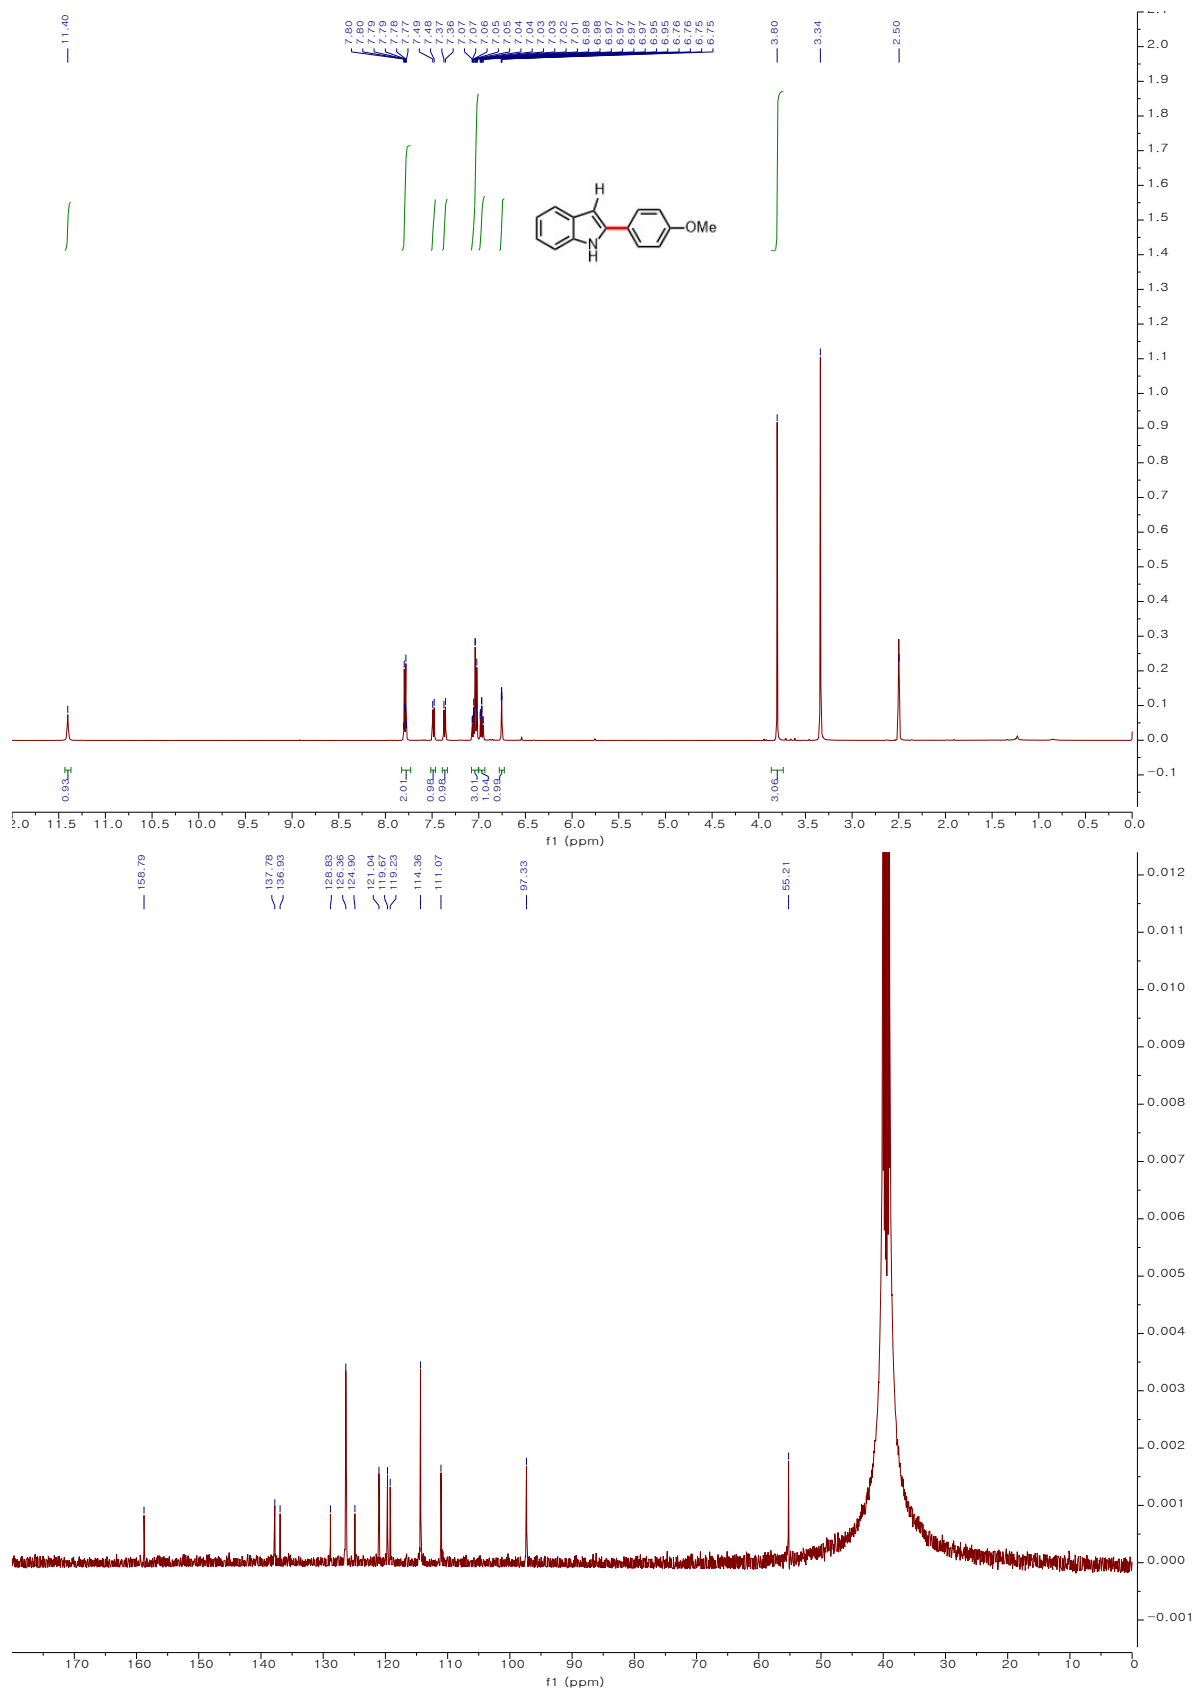

**2-(4-Fluorophenyl)-1H-indole (3ad);**

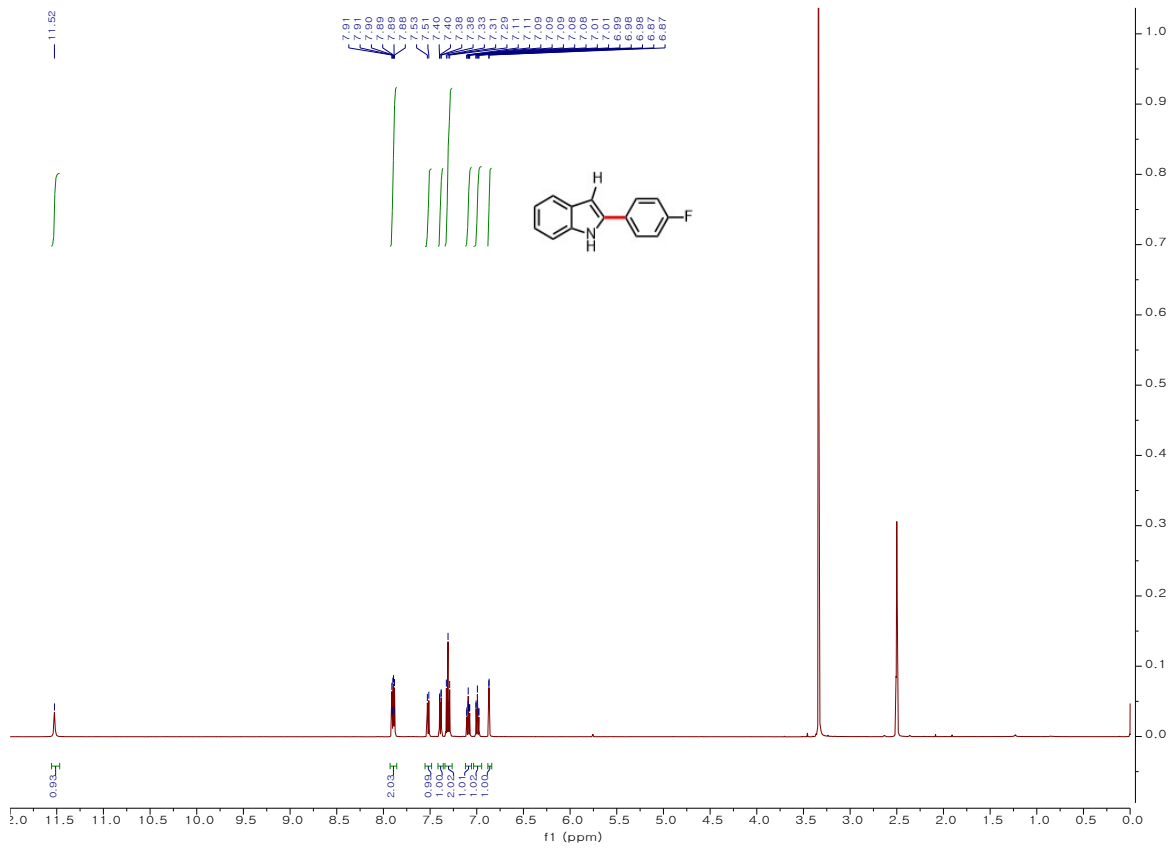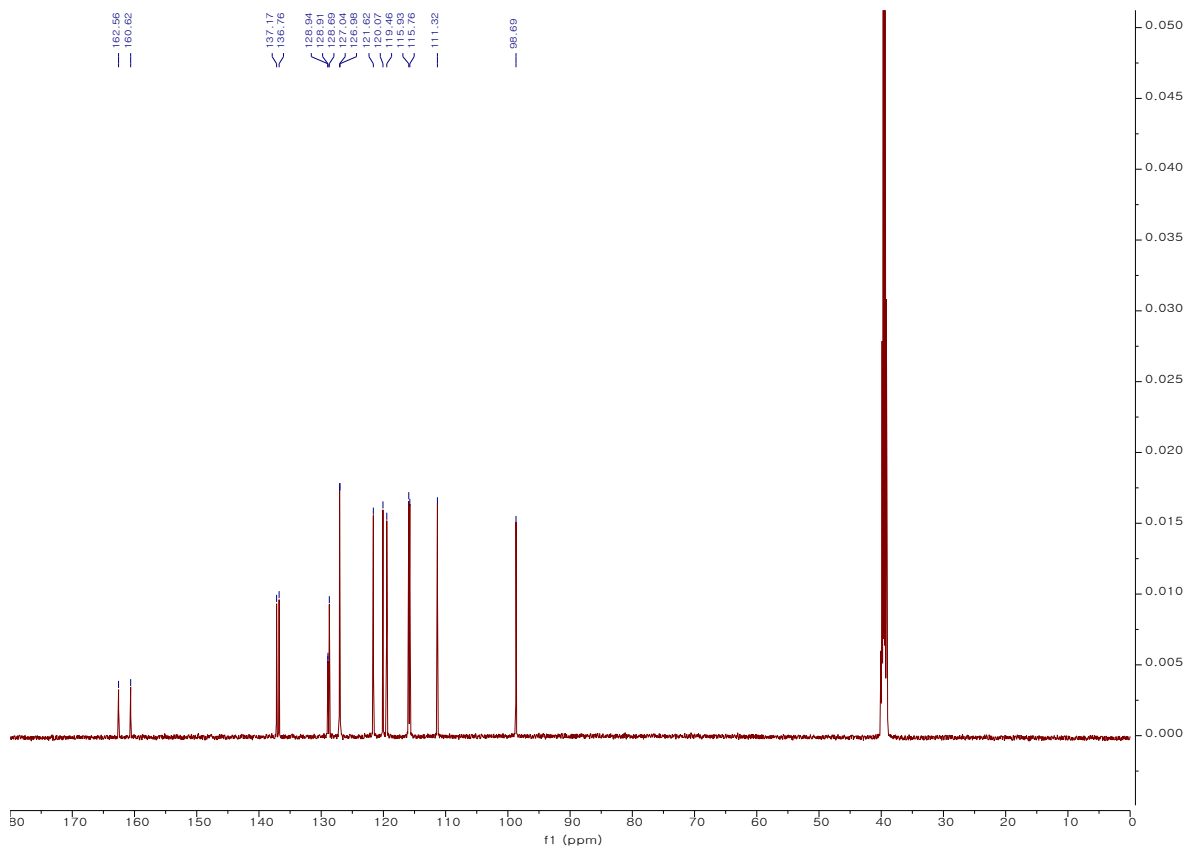

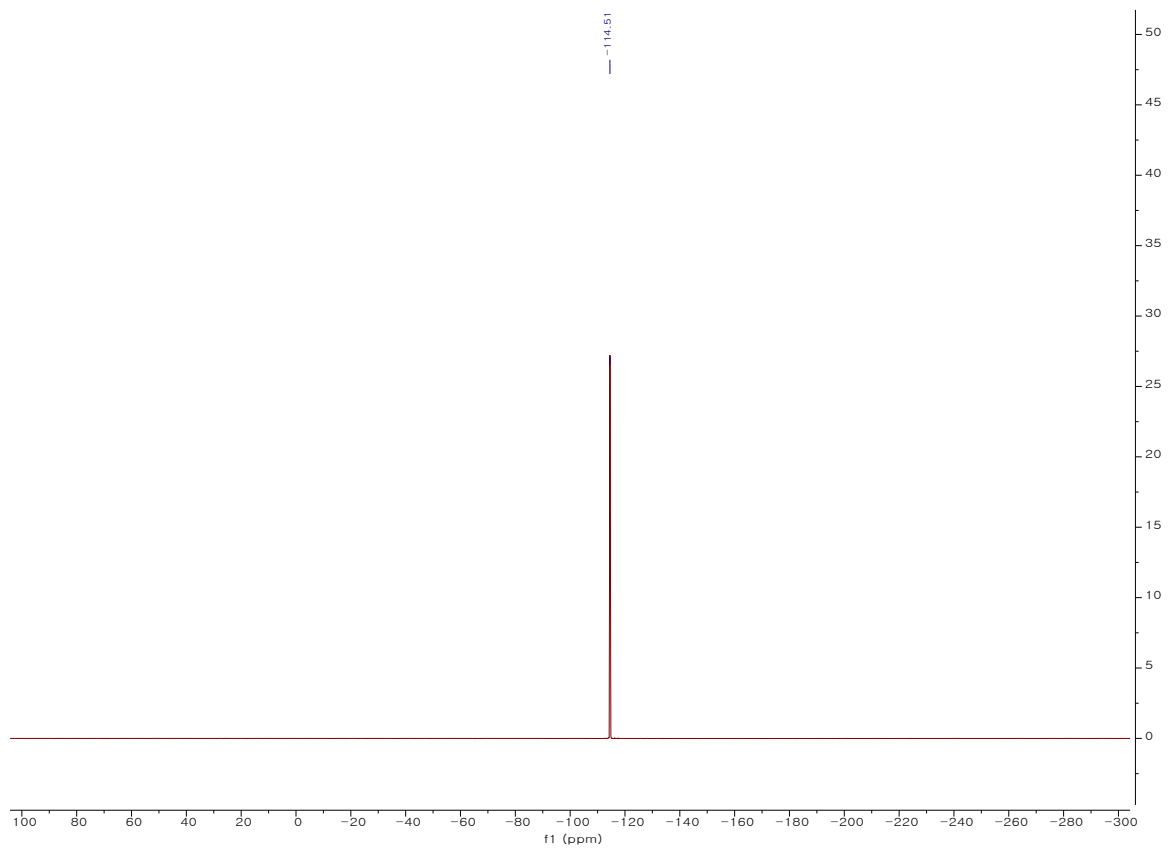

**2-(4-Chlorophenyl)-1H-indole (3ae);**

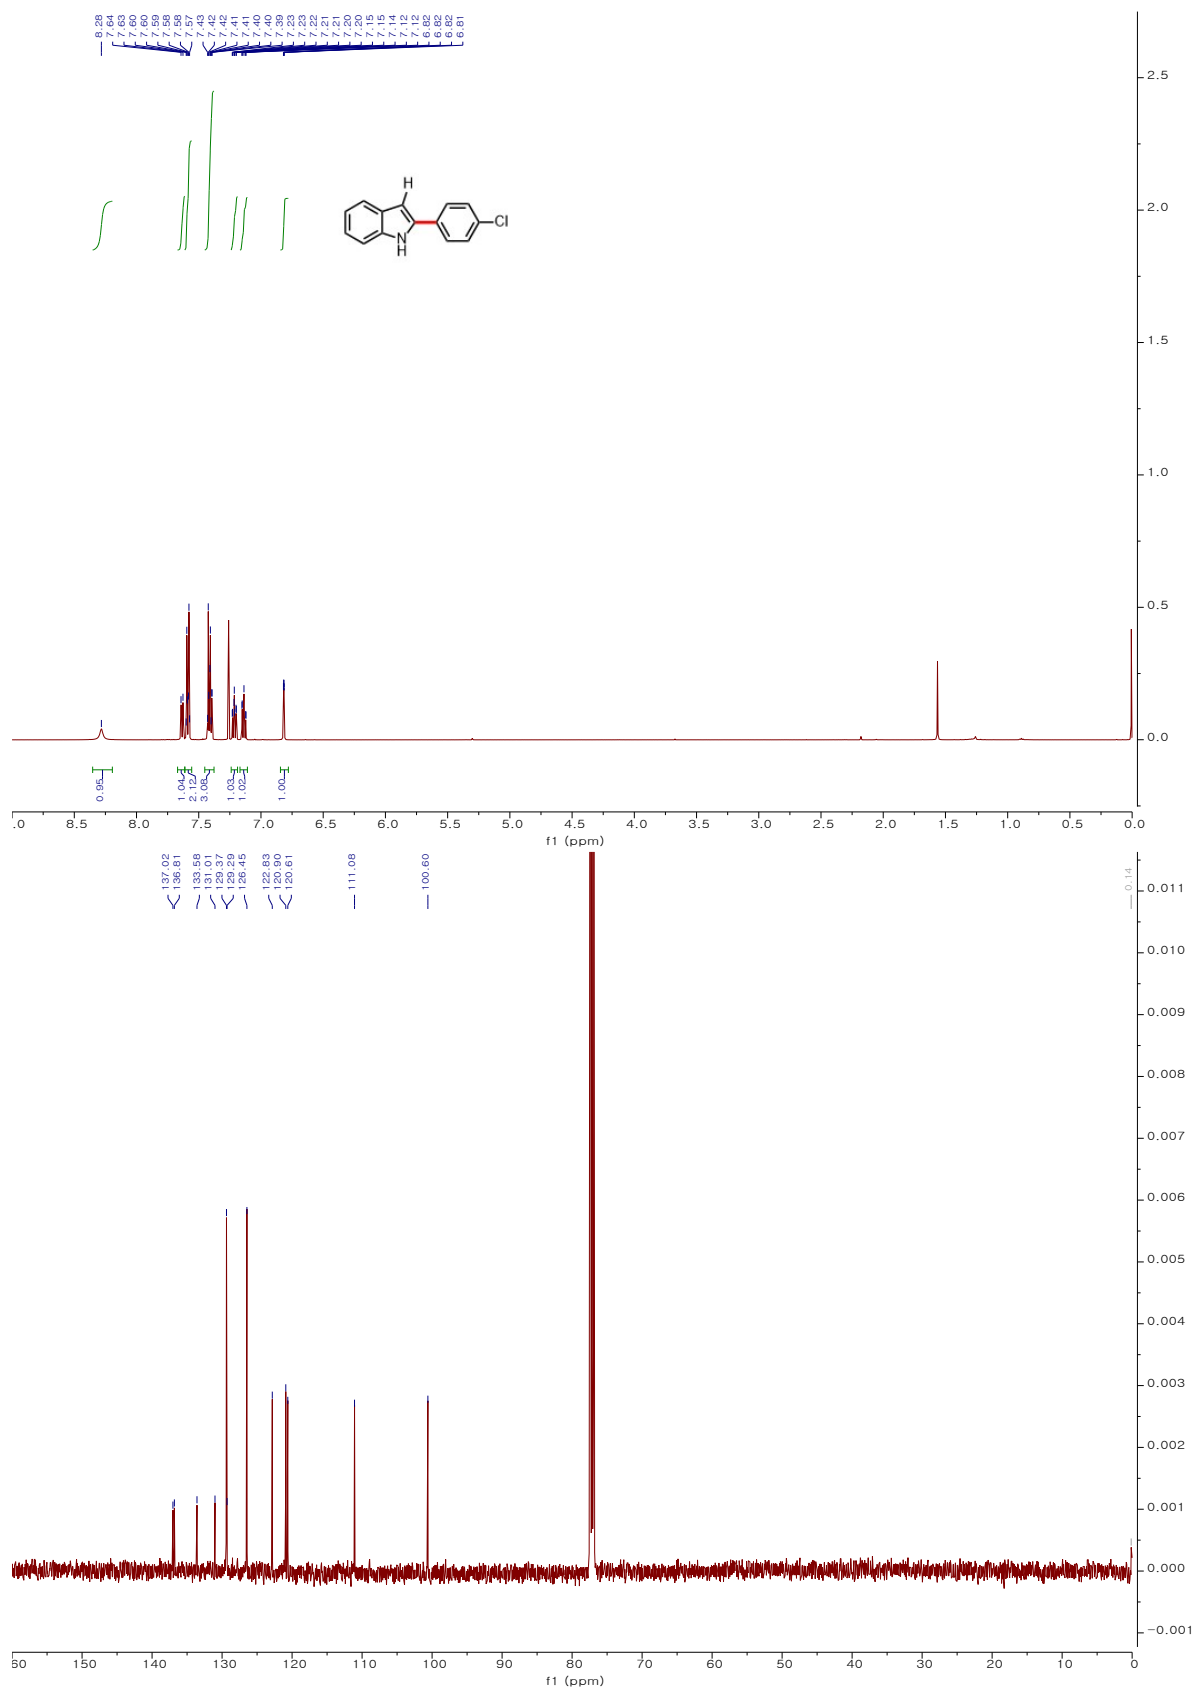

**2-(4-Bromophenyl)-1H-indole (3af);**

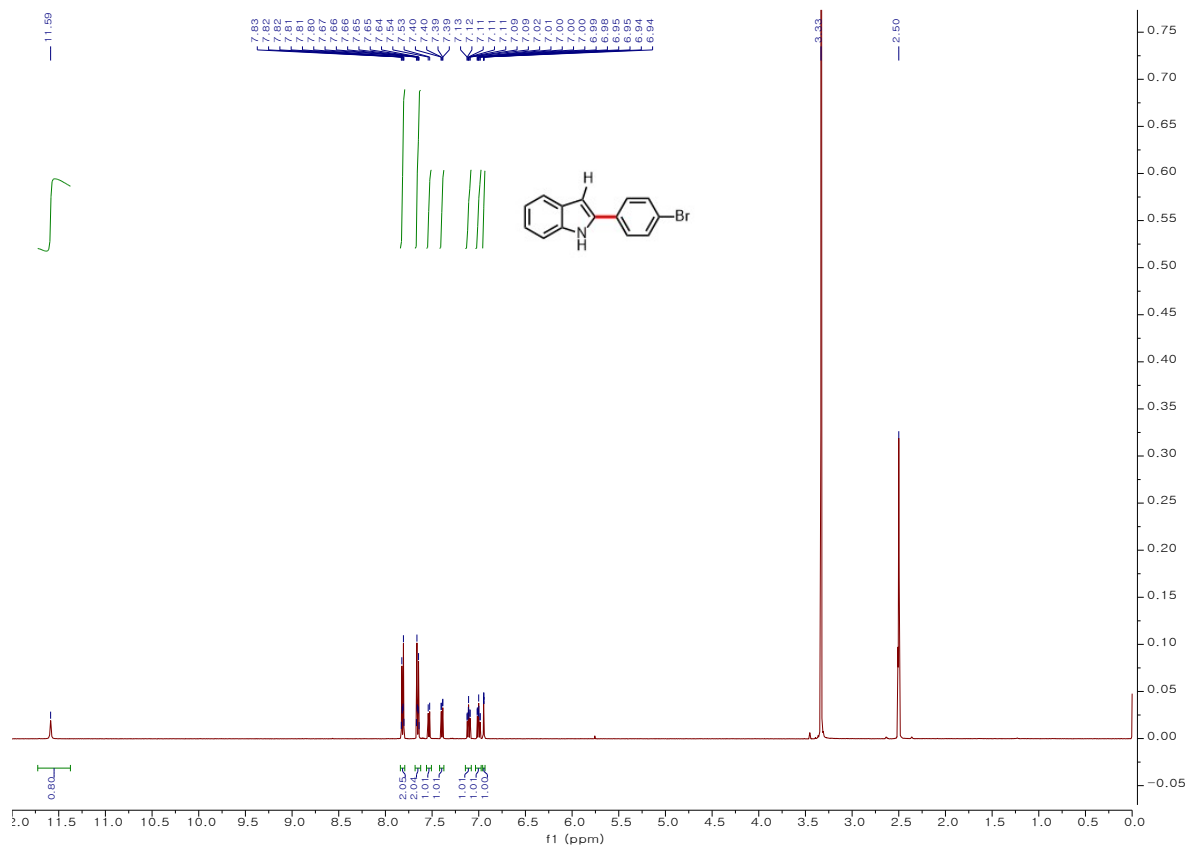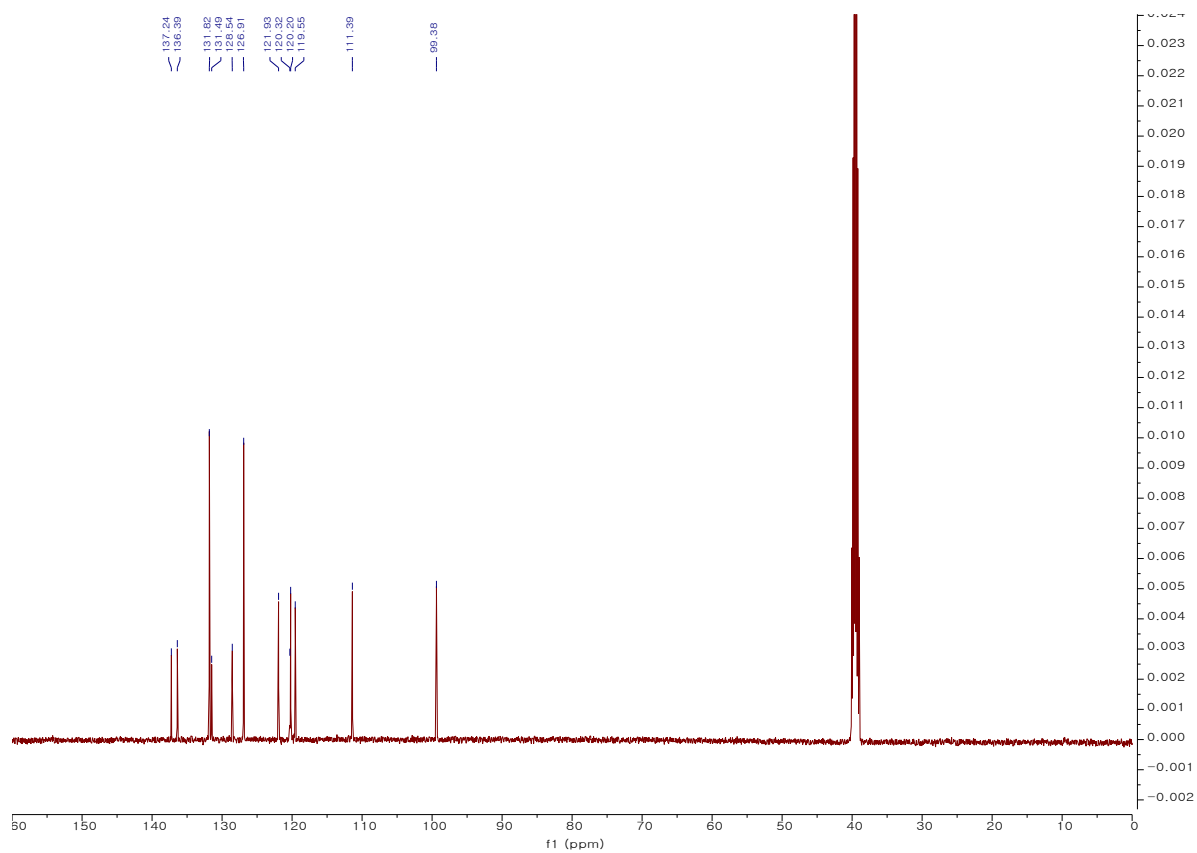

2-(4-(Trifluoromethyl)phenyl)-1H-indole (3ag);

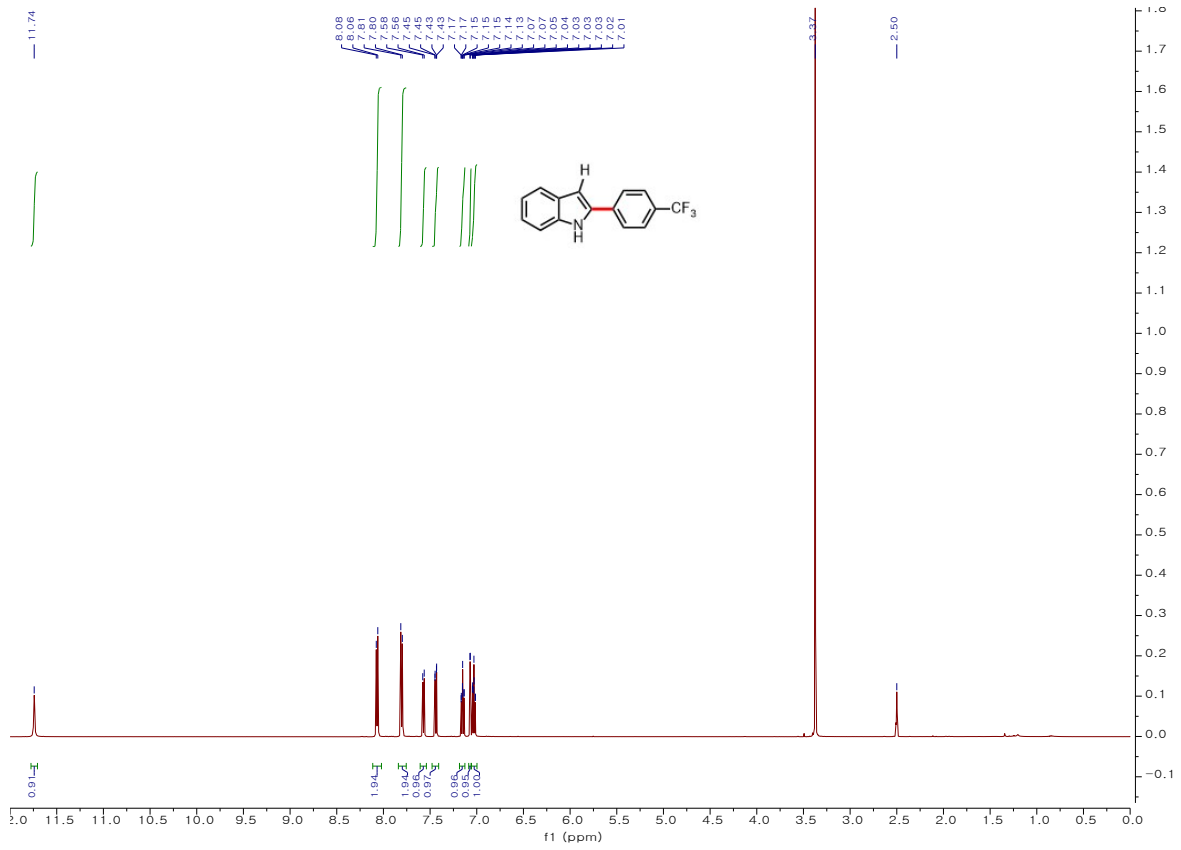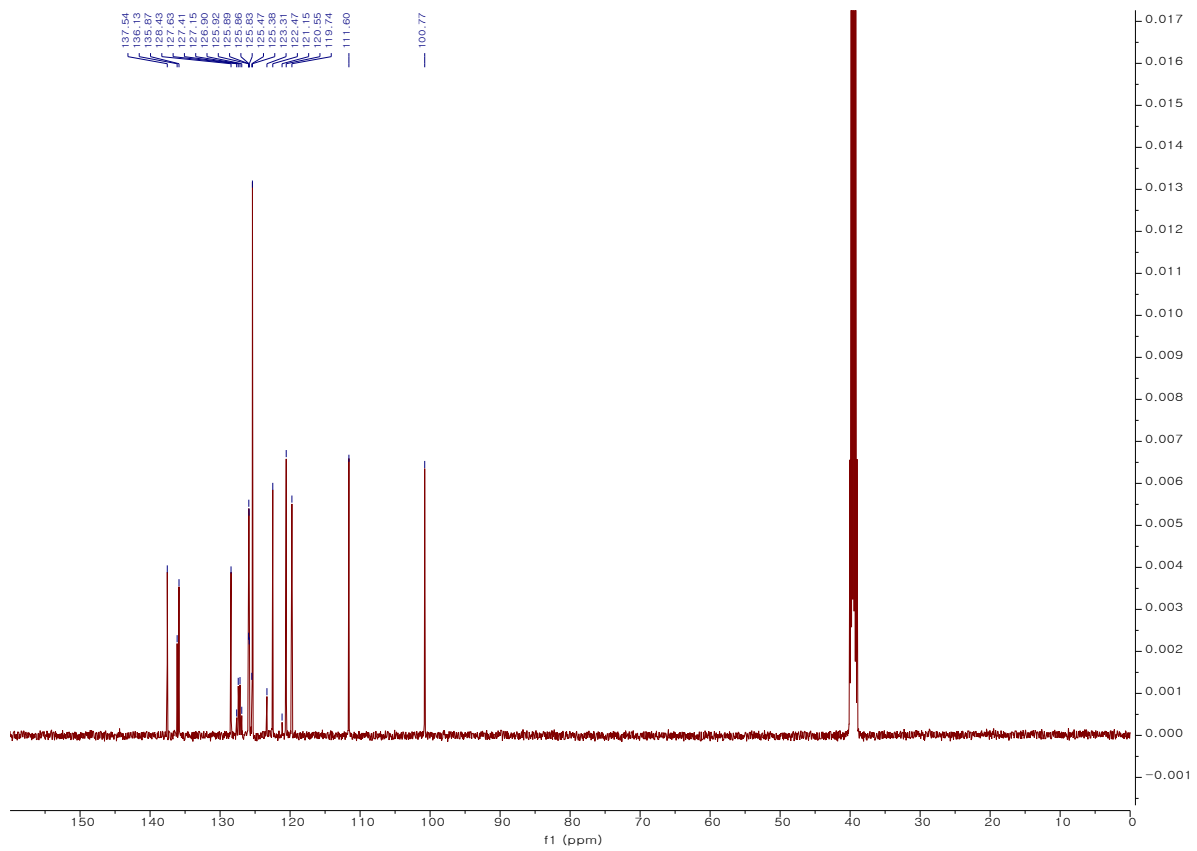

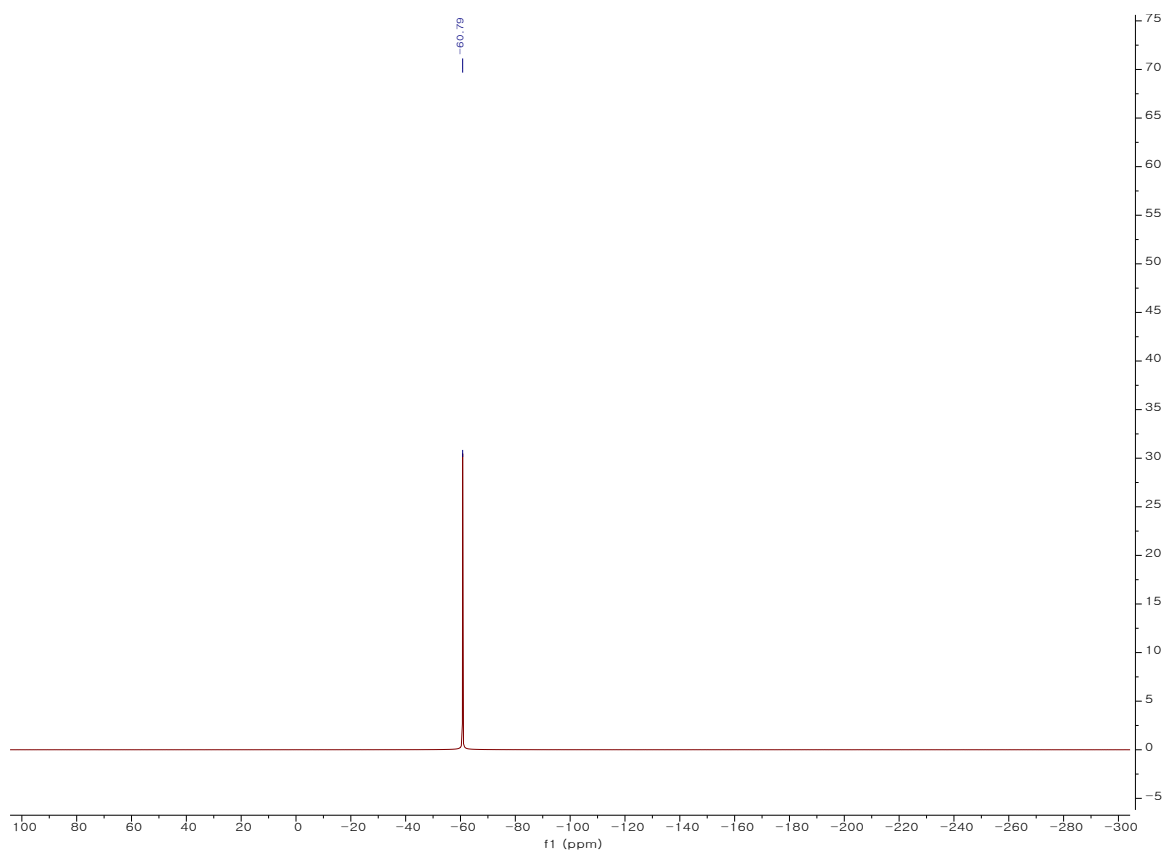





**tert-Butyl (3-(1H-indol-2-yl)phenyl)carbamate (3ai);**

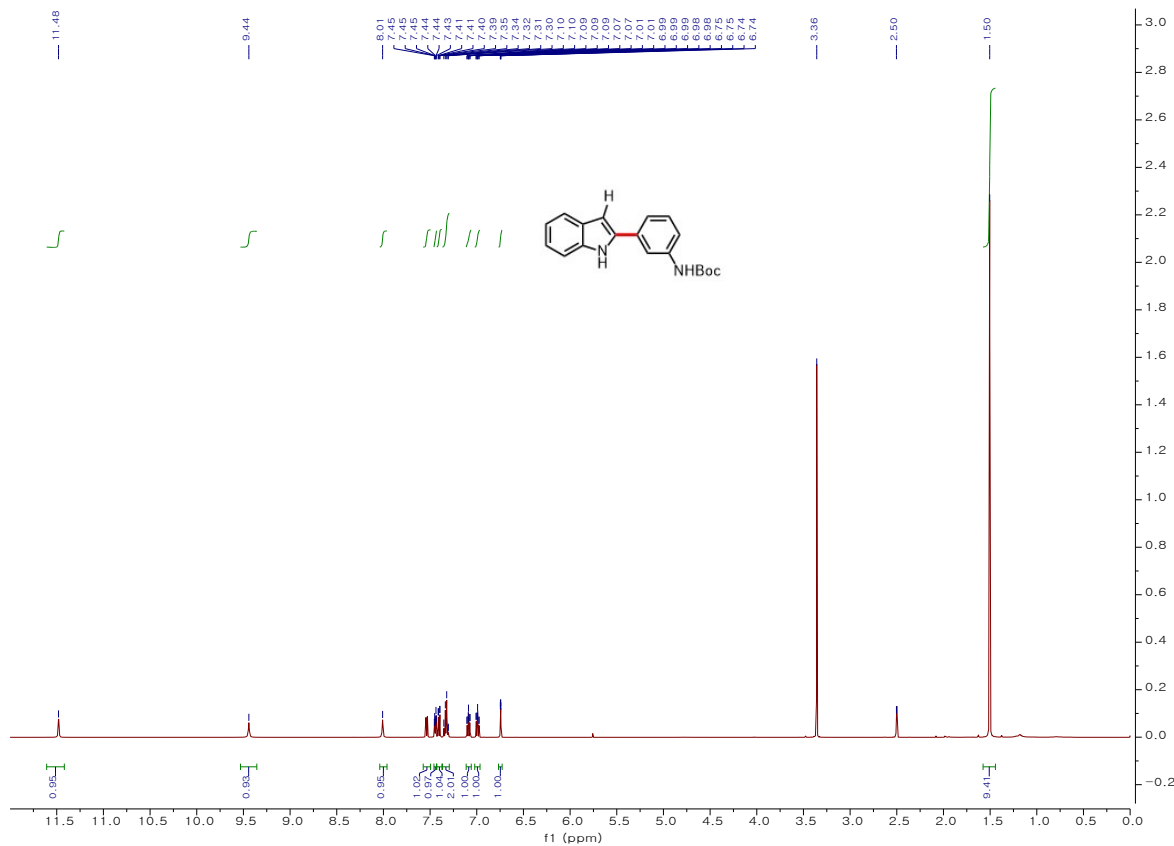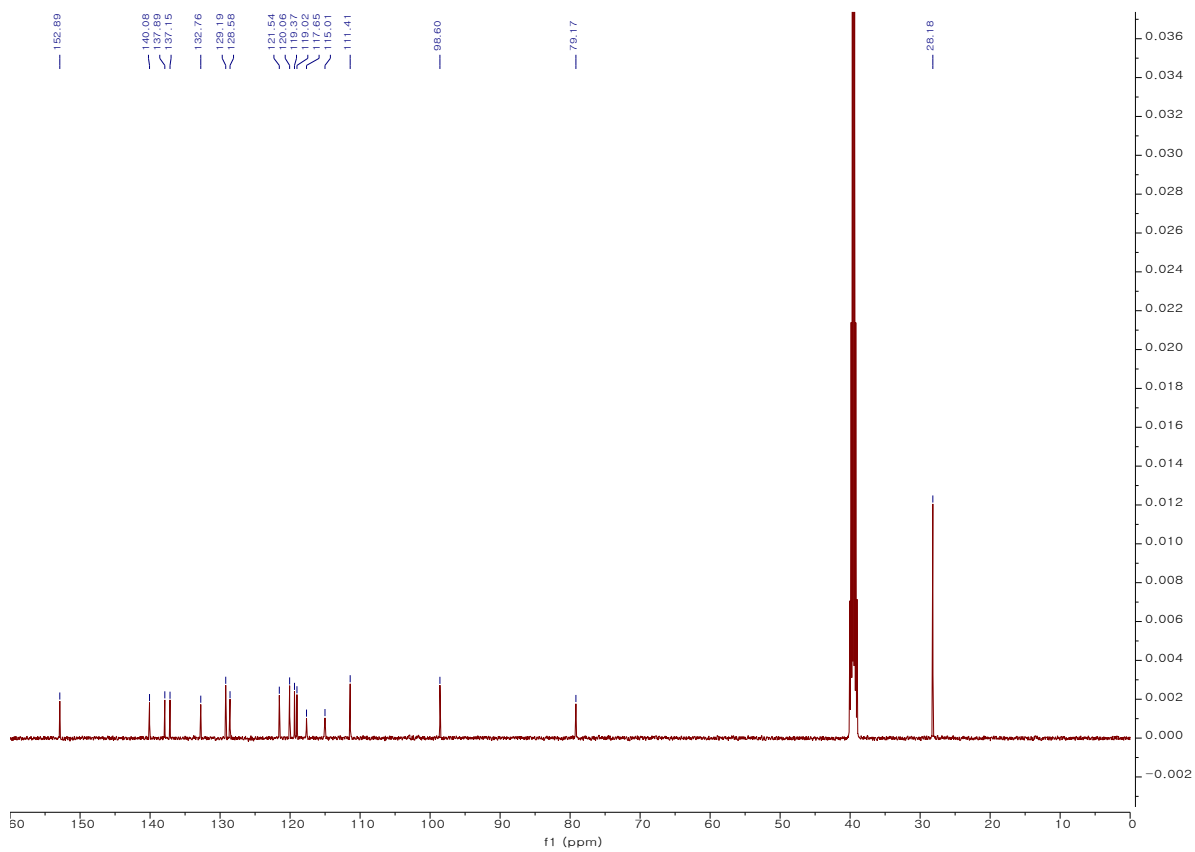

4-(1*H*-Indol-2-yl)phenyl acetate (3aj);

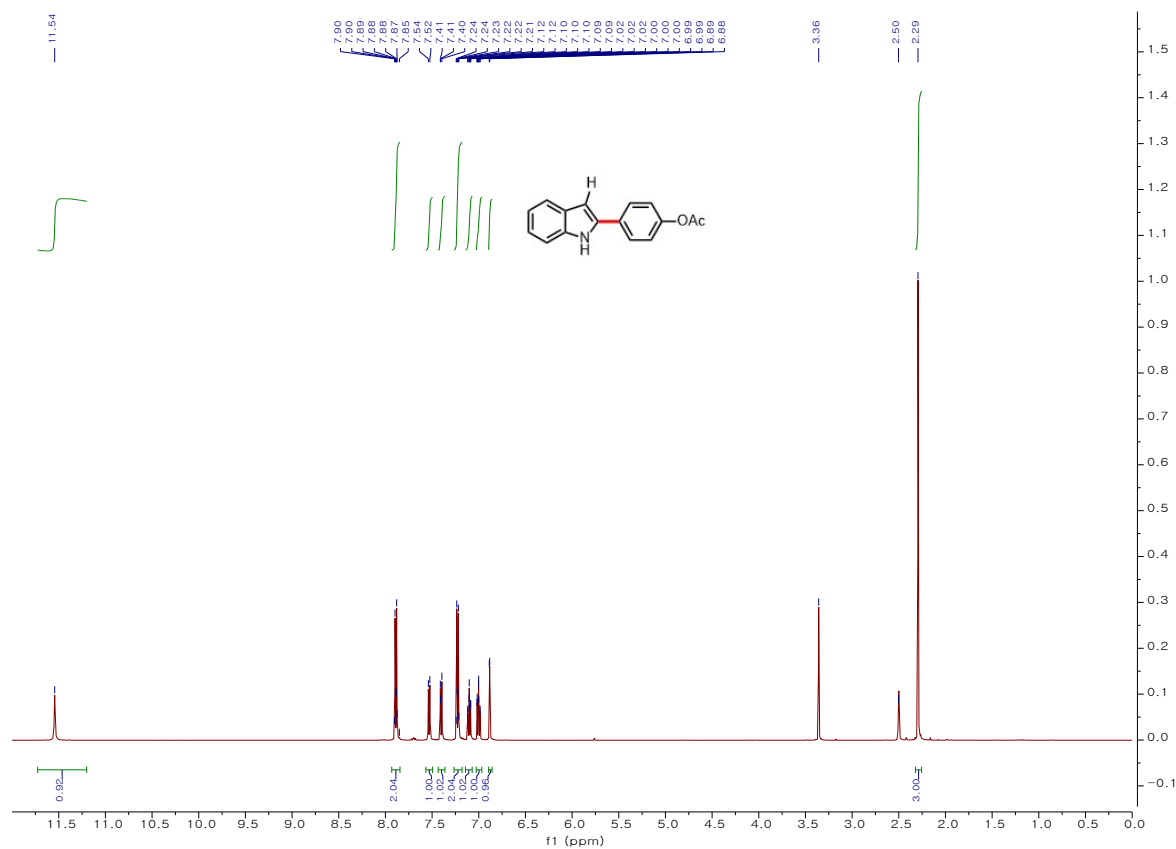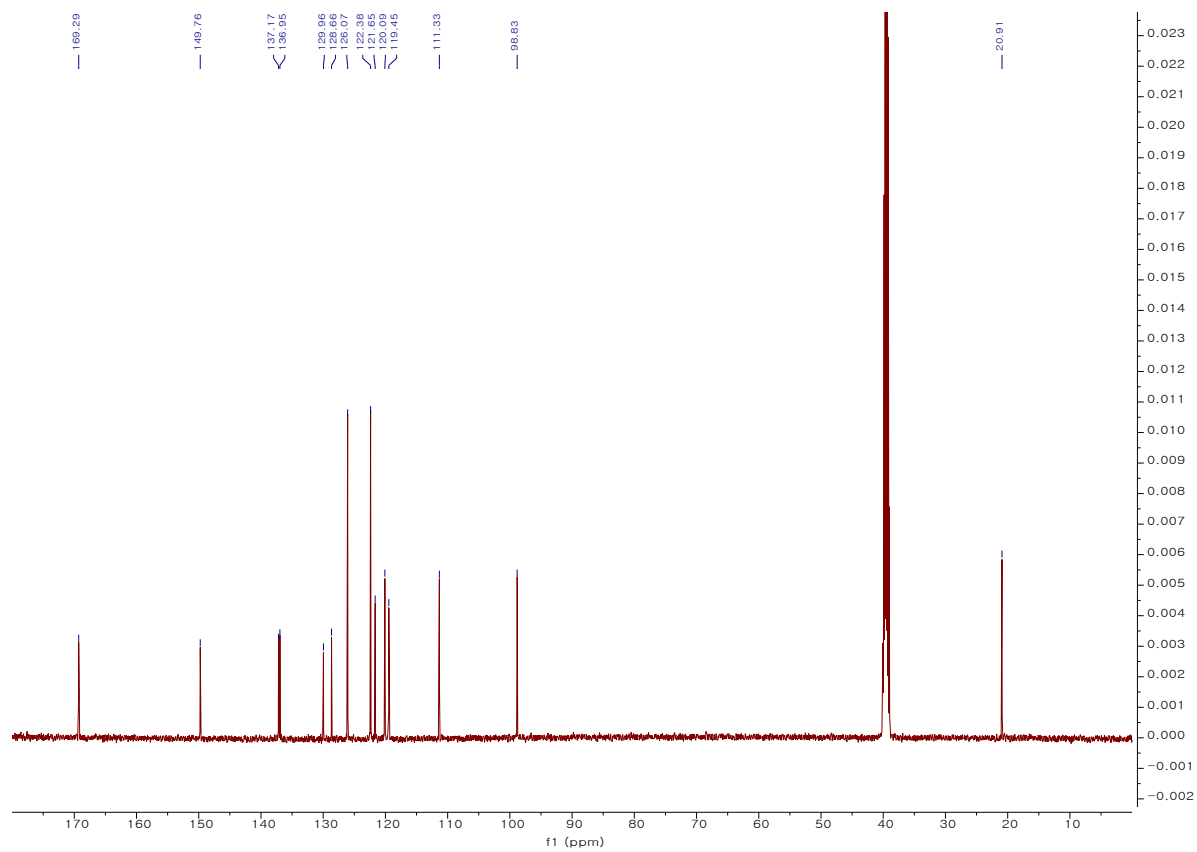





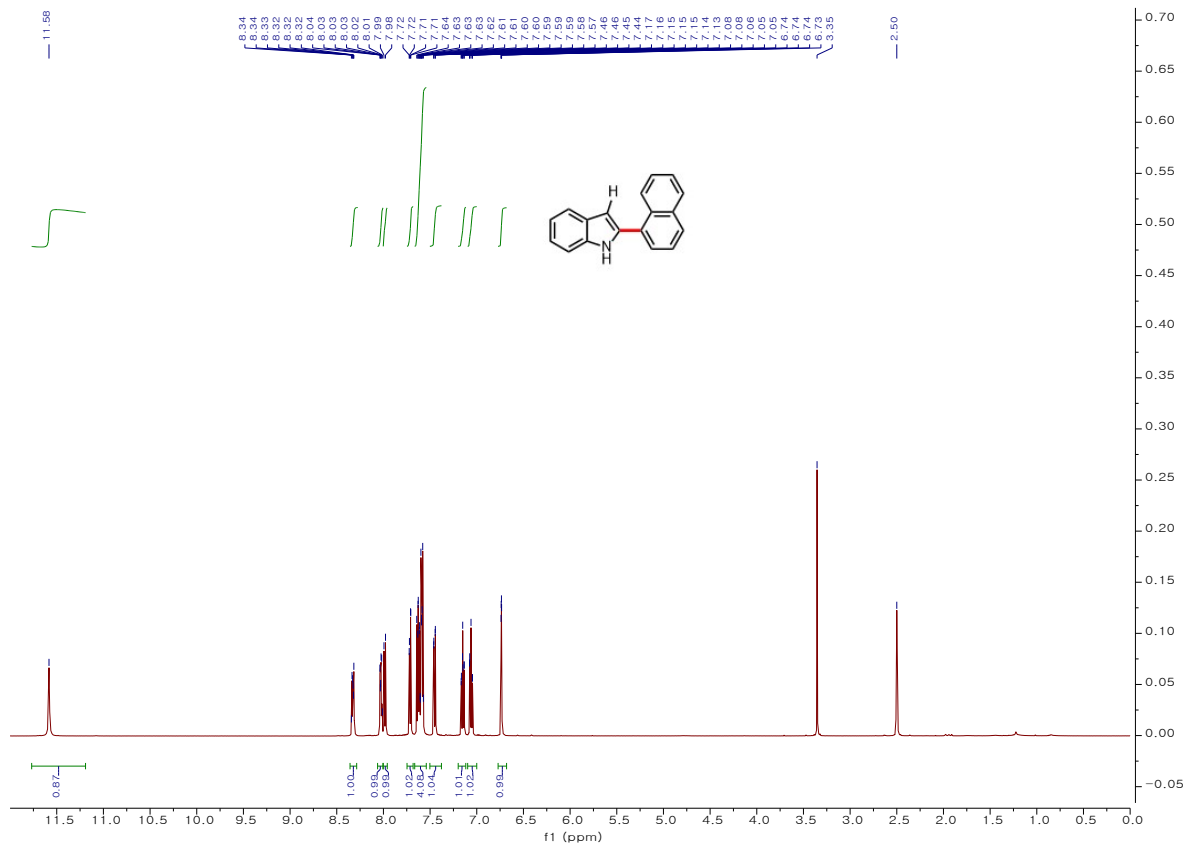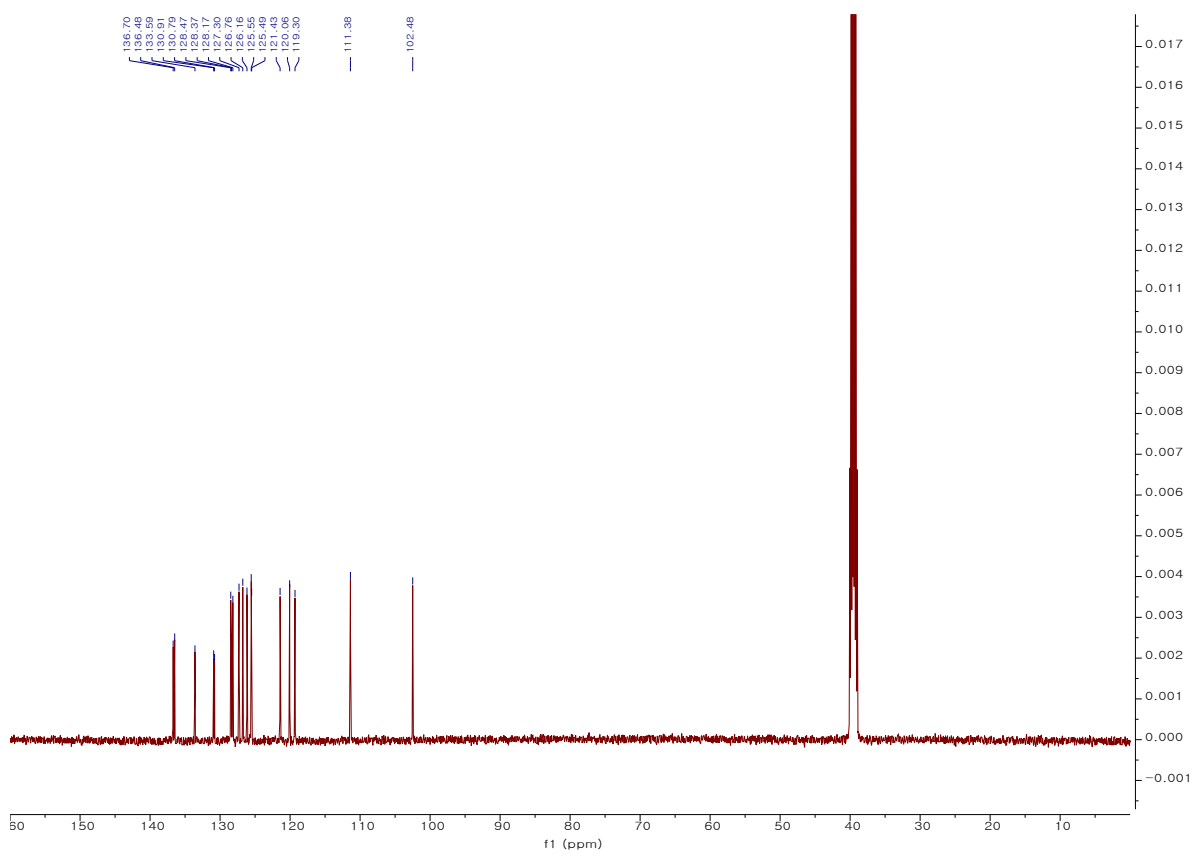

**2-(o-Tolyl)-1H-indole (3an);**

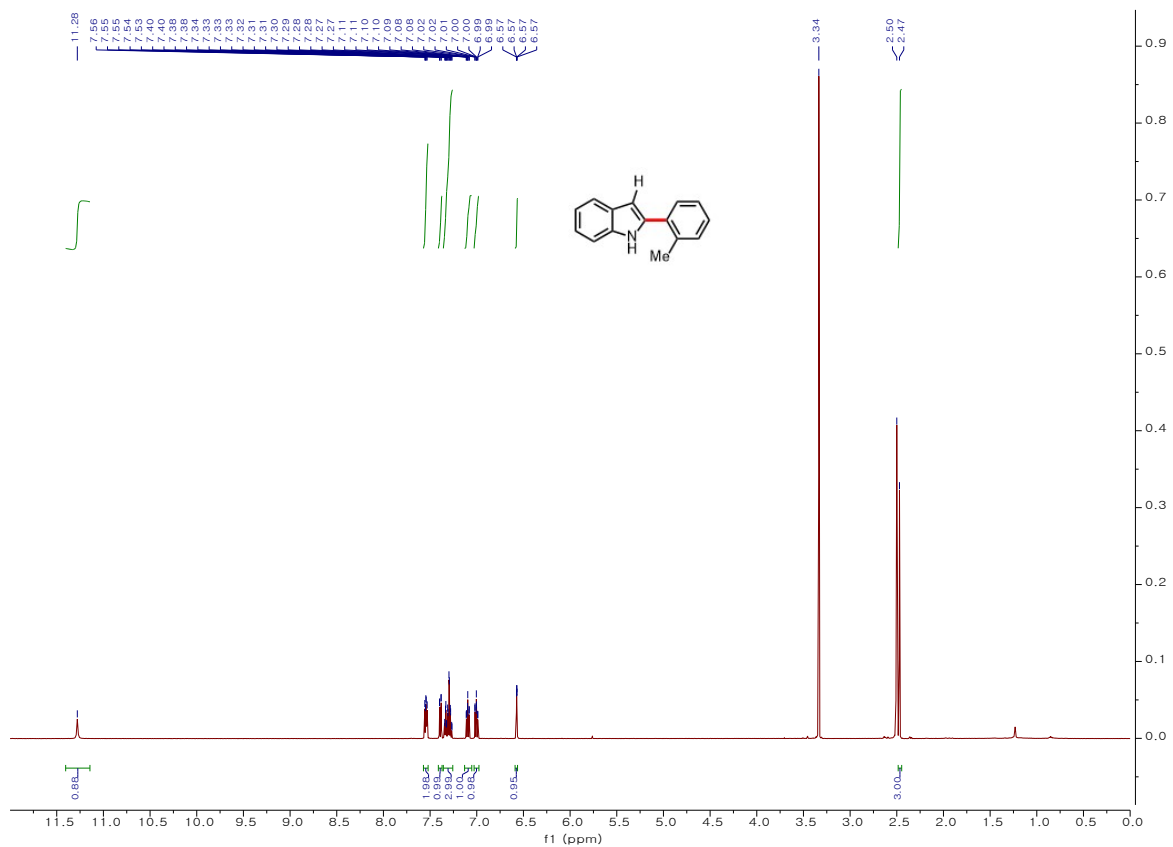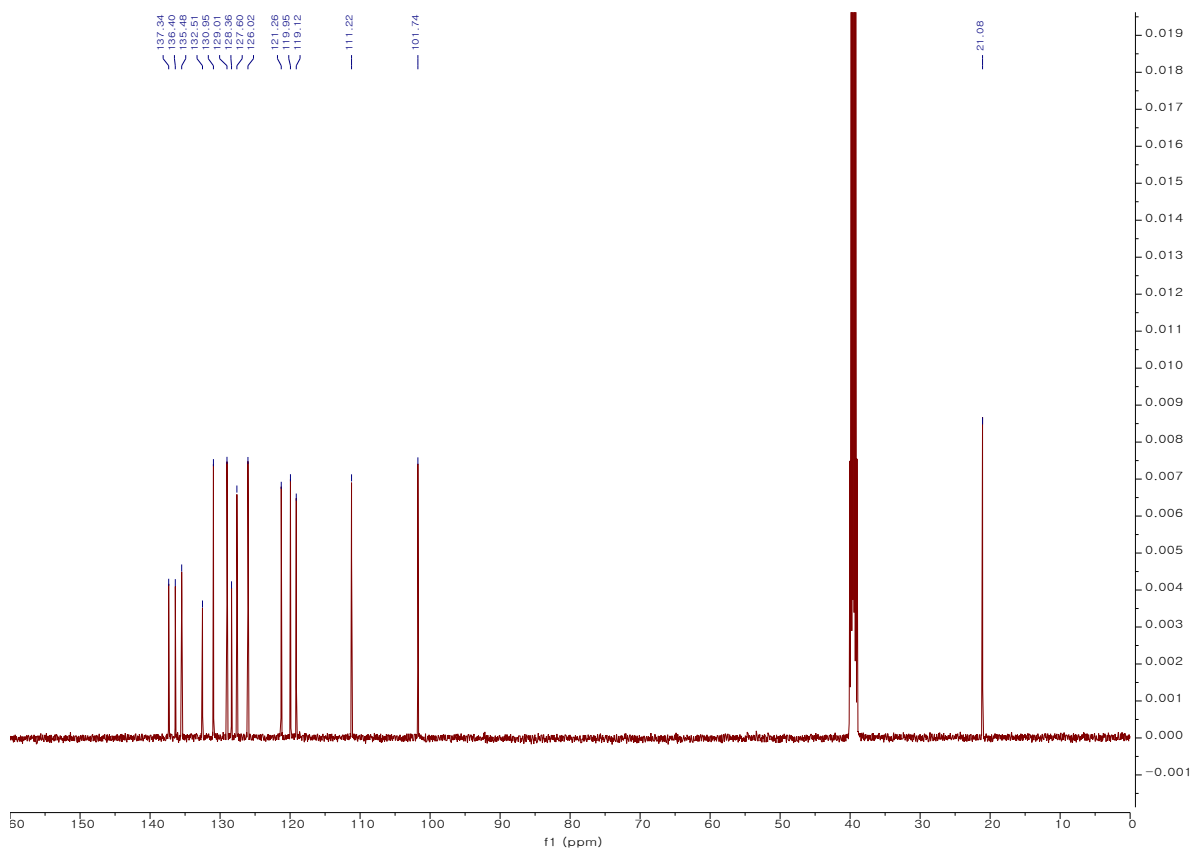

**3-Phenyl-1H-indole (4aa);**

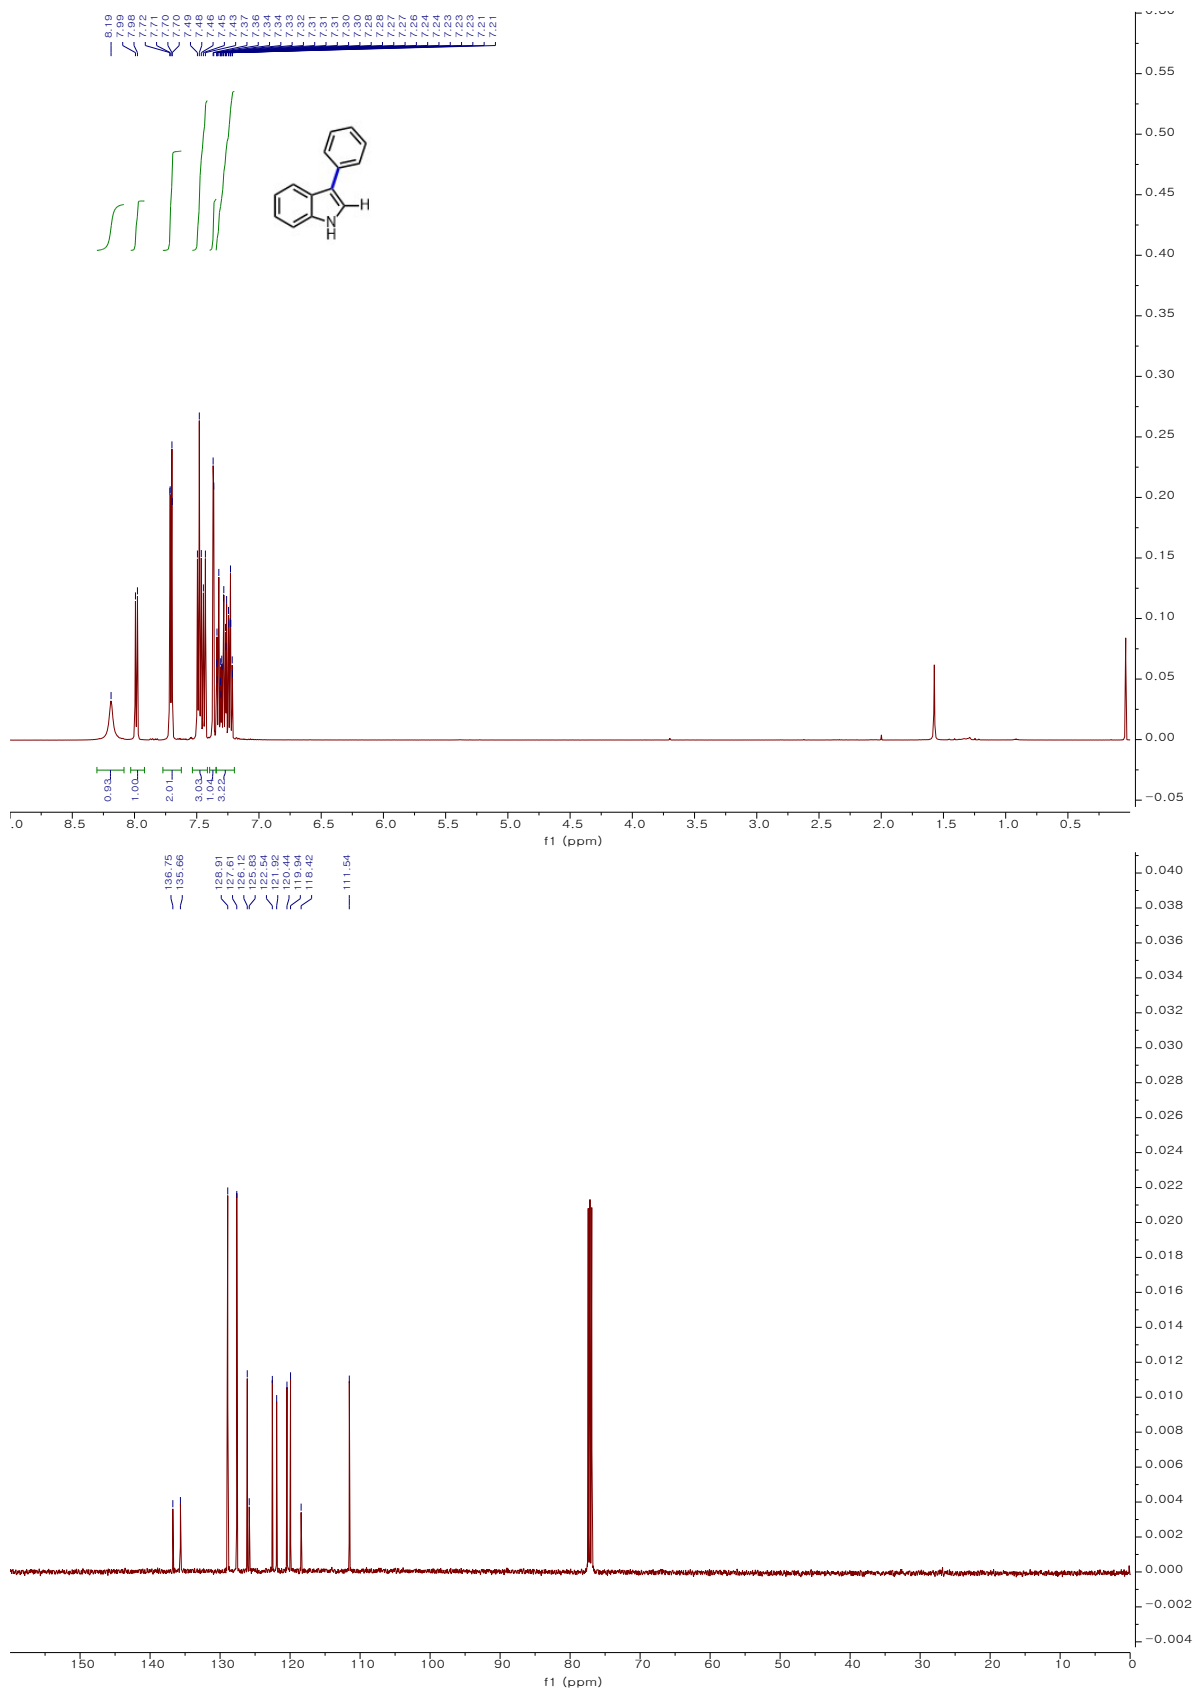



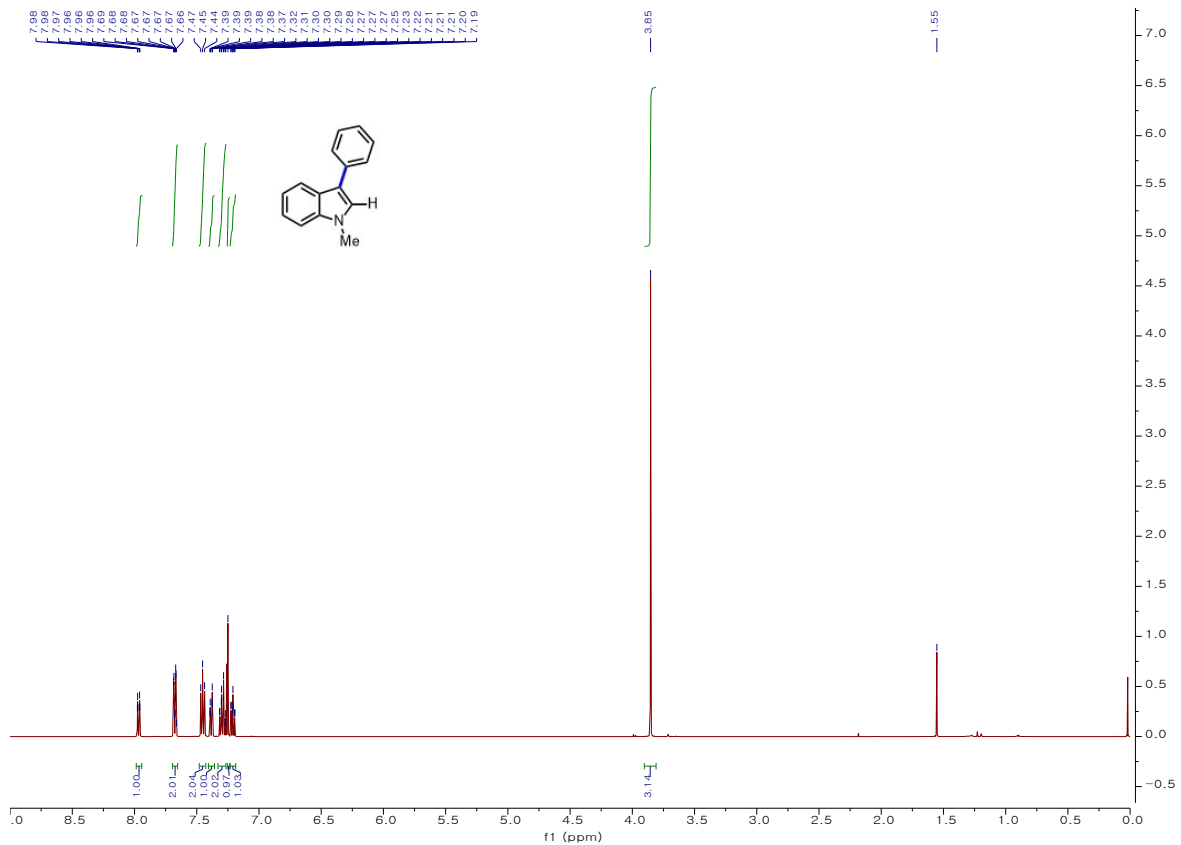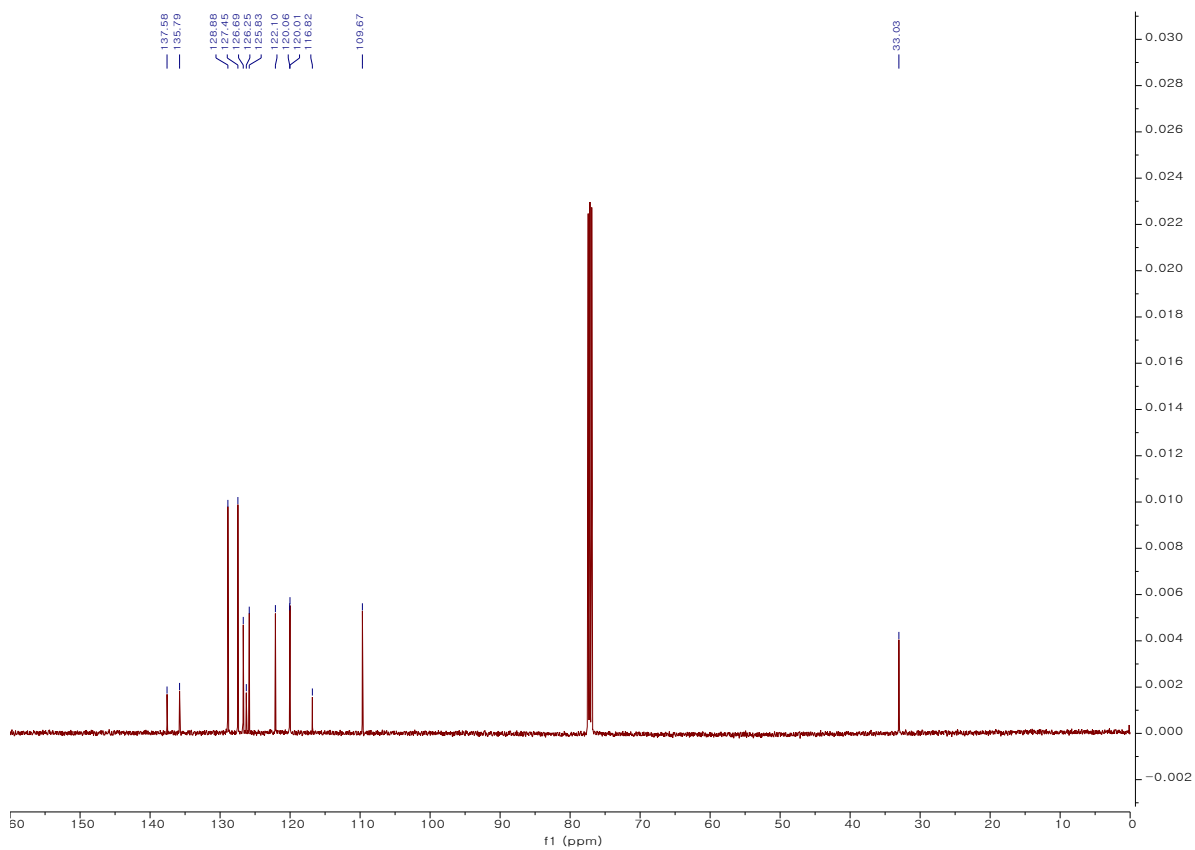

**5-Methyl-3-phenyl-1H-indole (4da);**

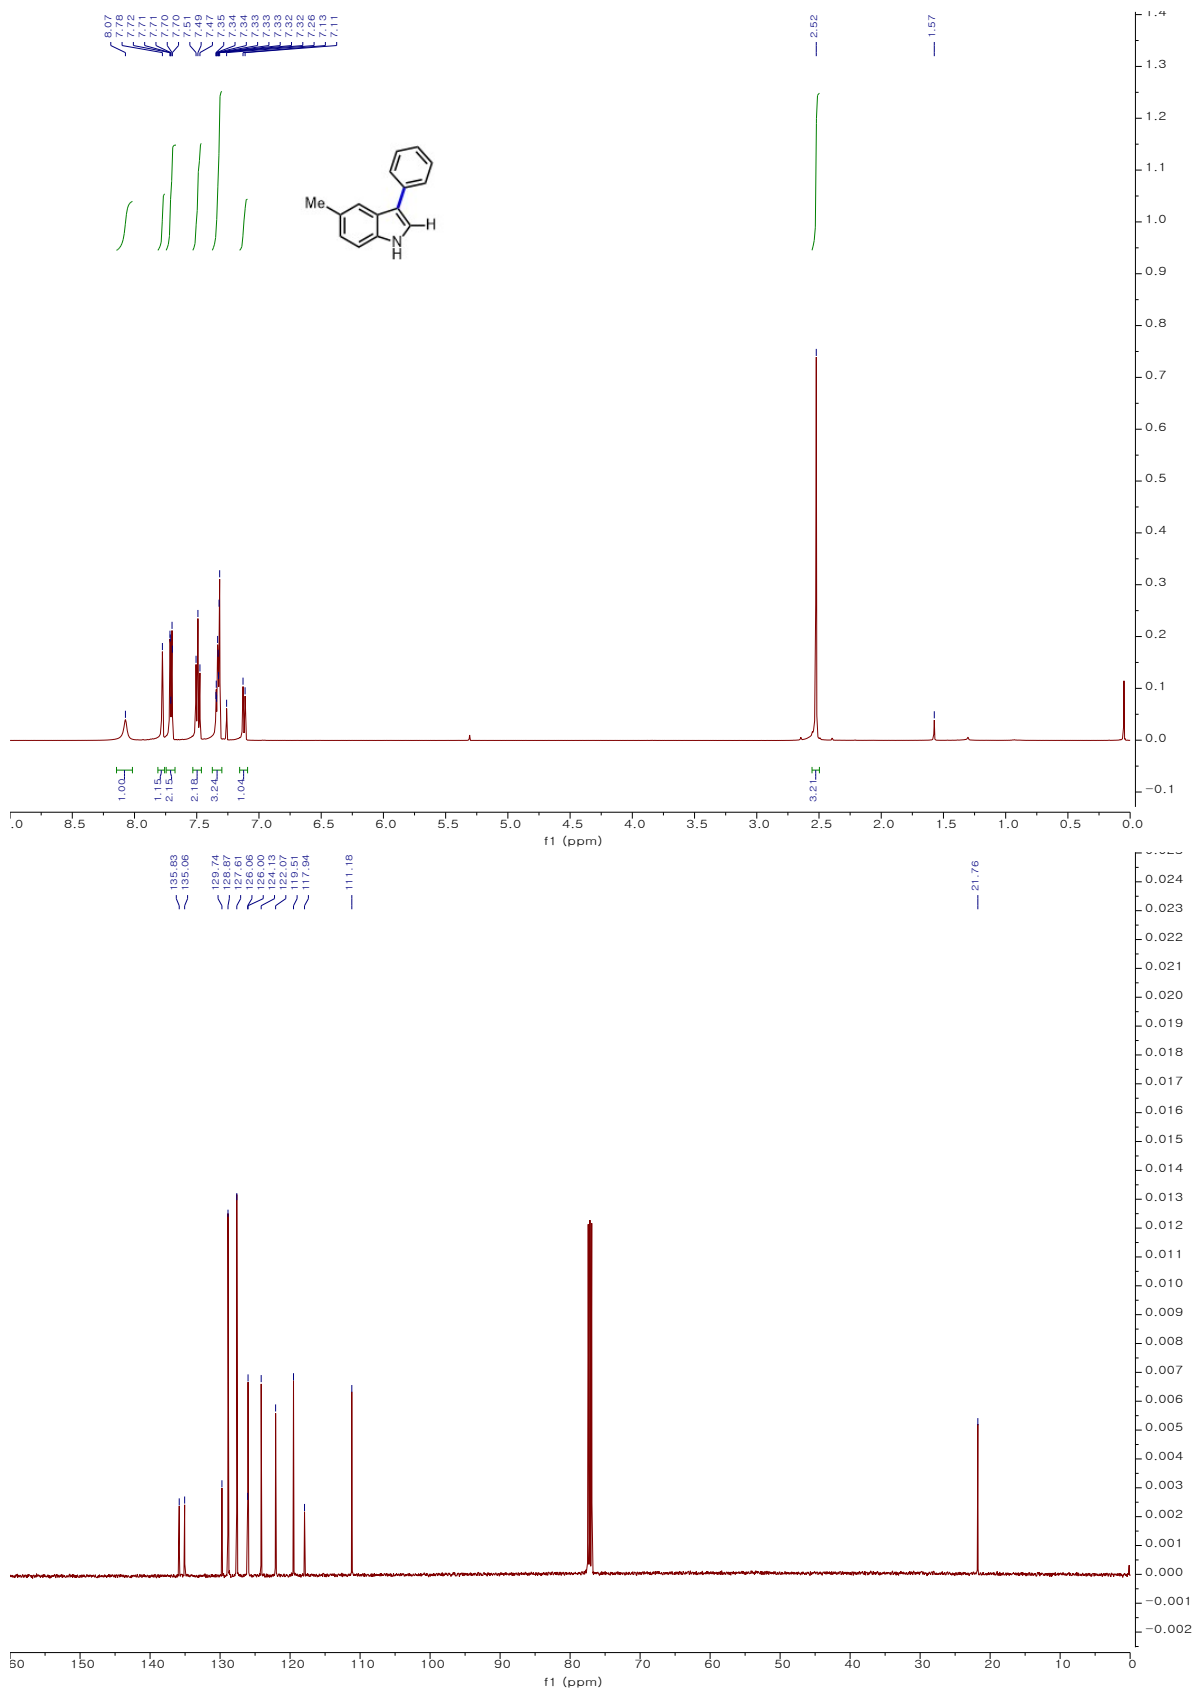

**3-Phenyl-1H-indol-5-ol (4ea);**

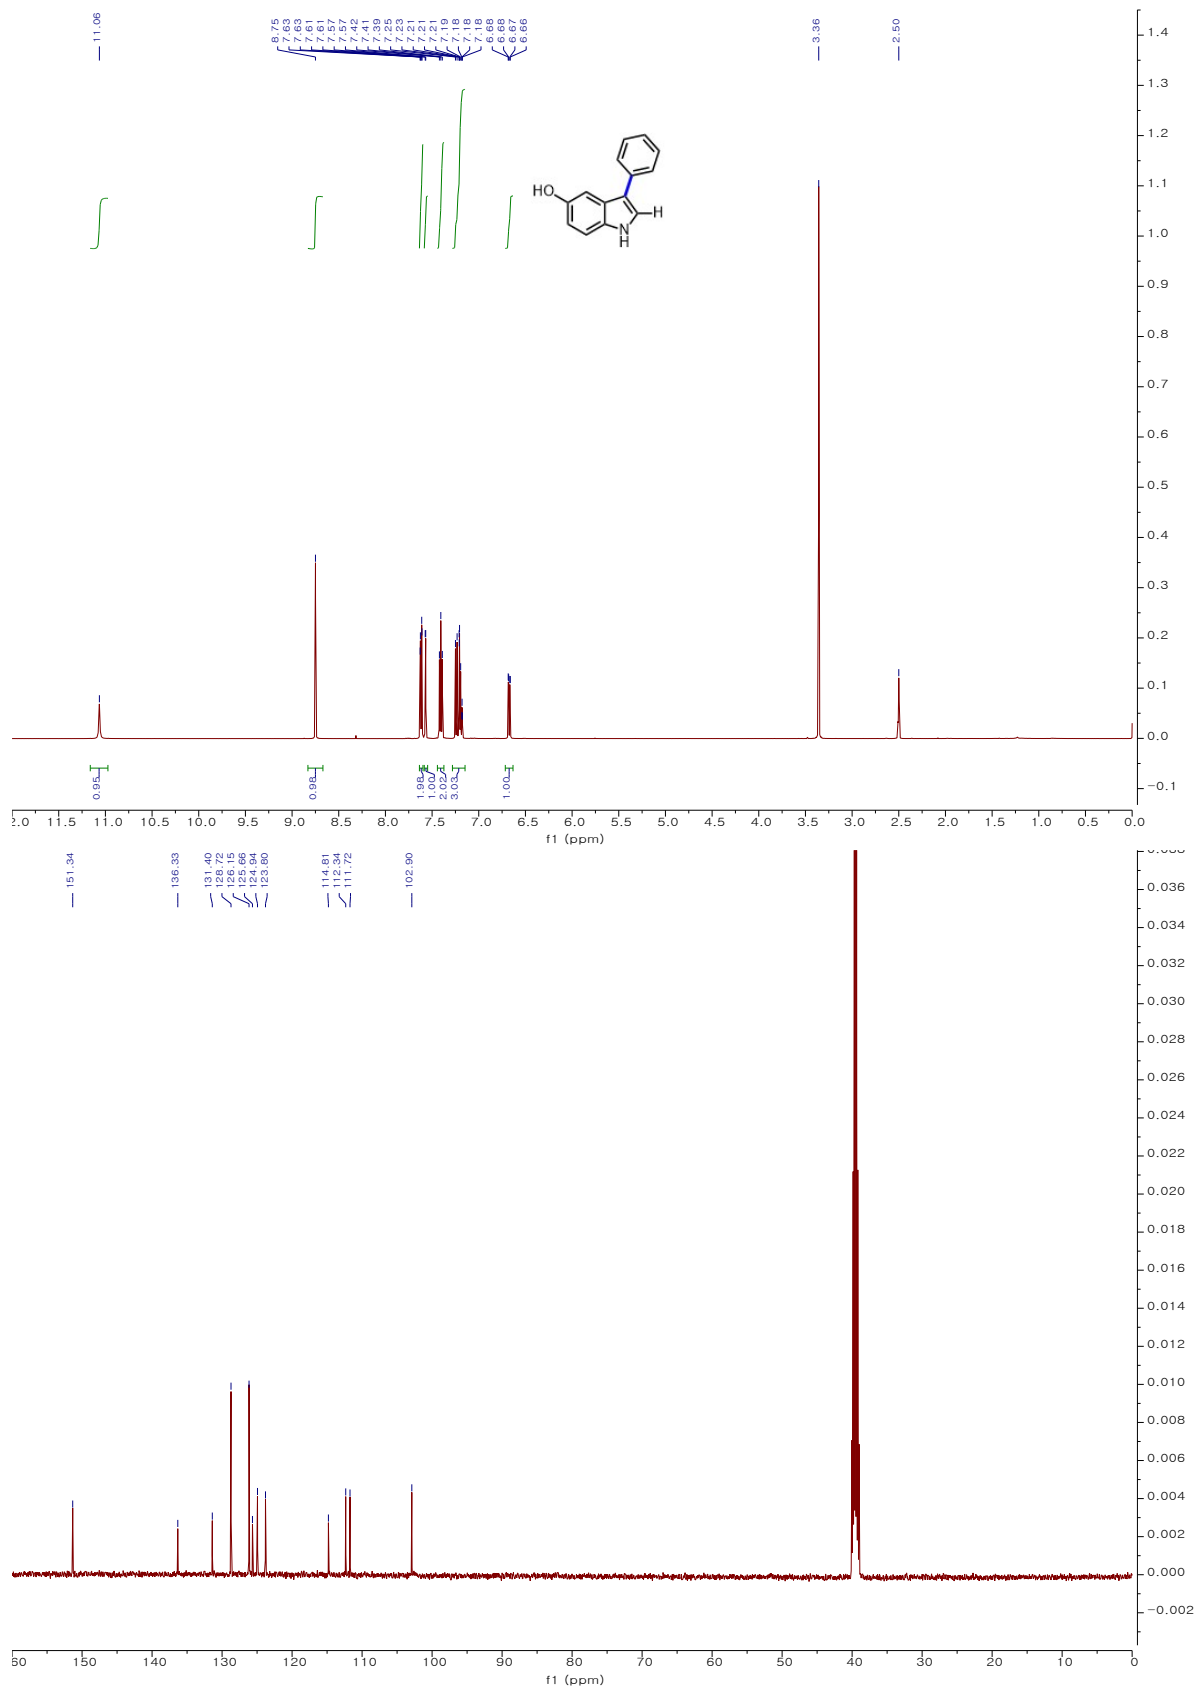

**5-Methoxy-3-phenyl-1H-indole (4fa);**

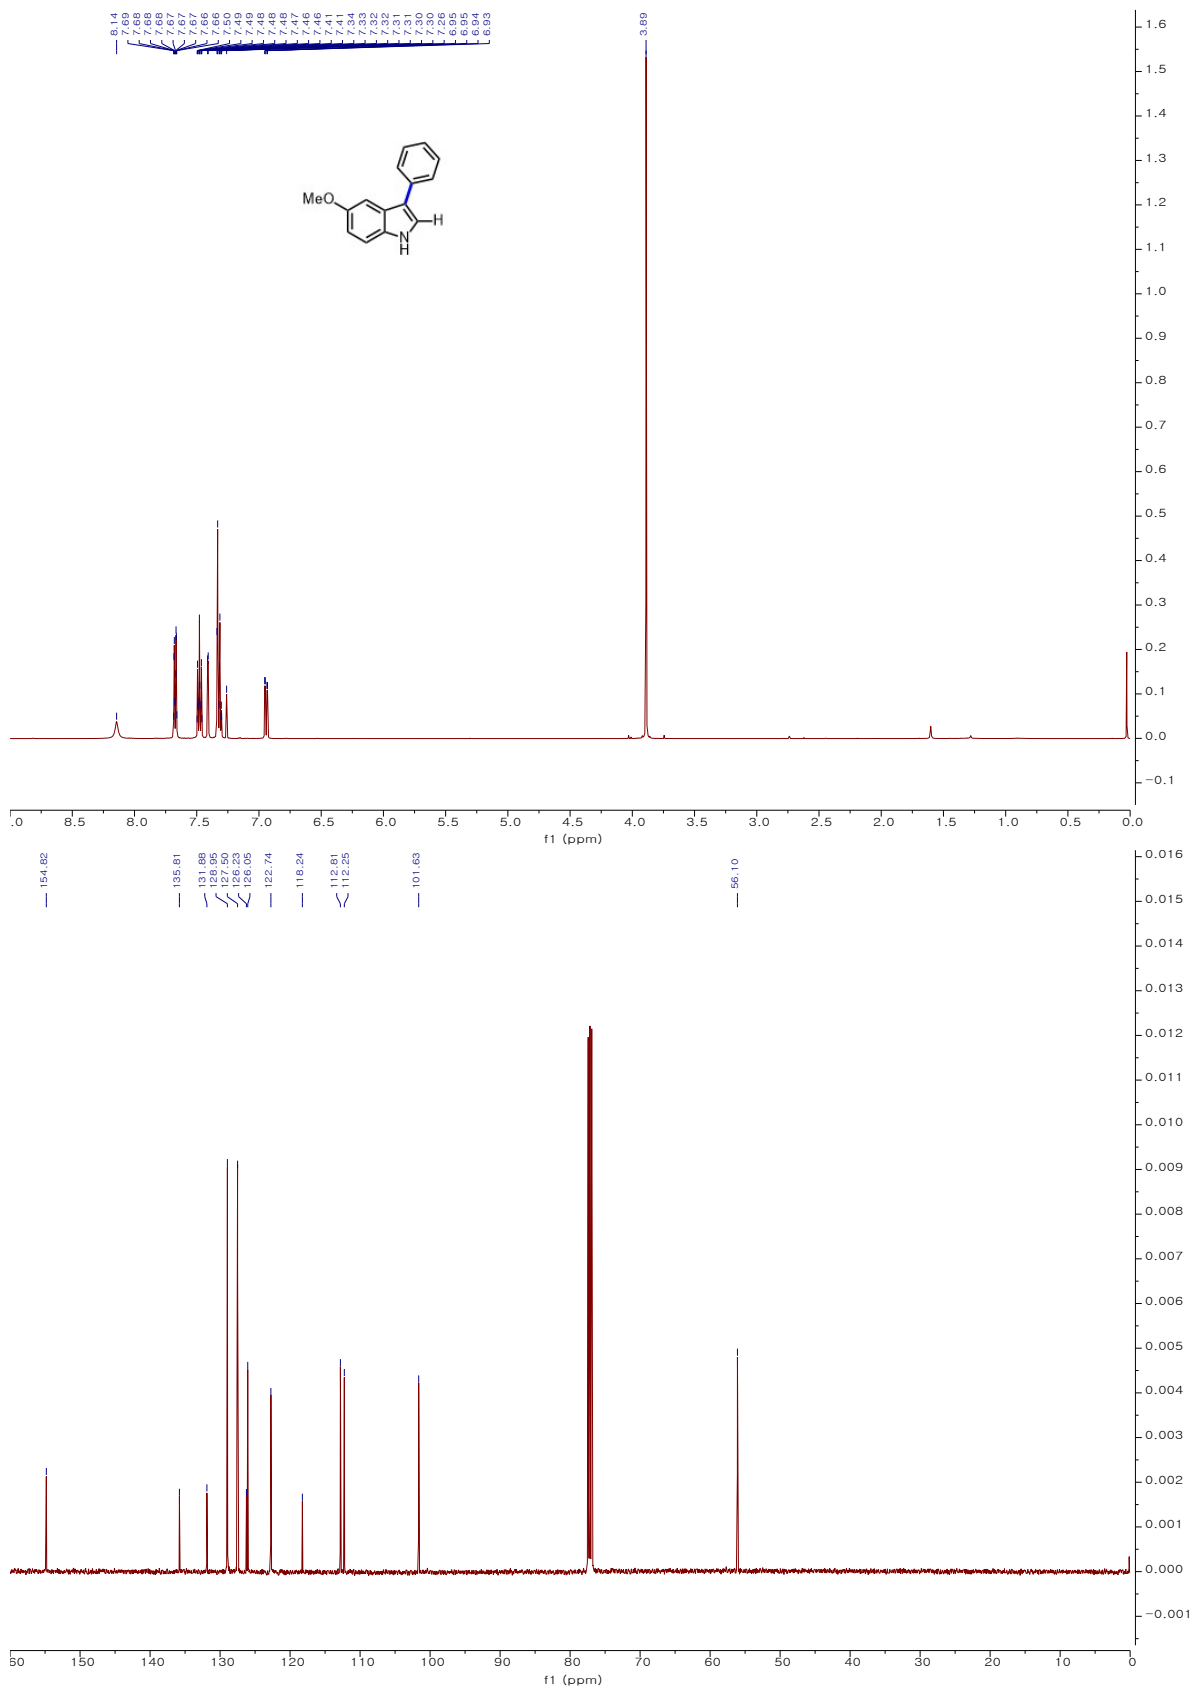

**4-Methoxy-3-phenyl-1H-indole (4ga);**

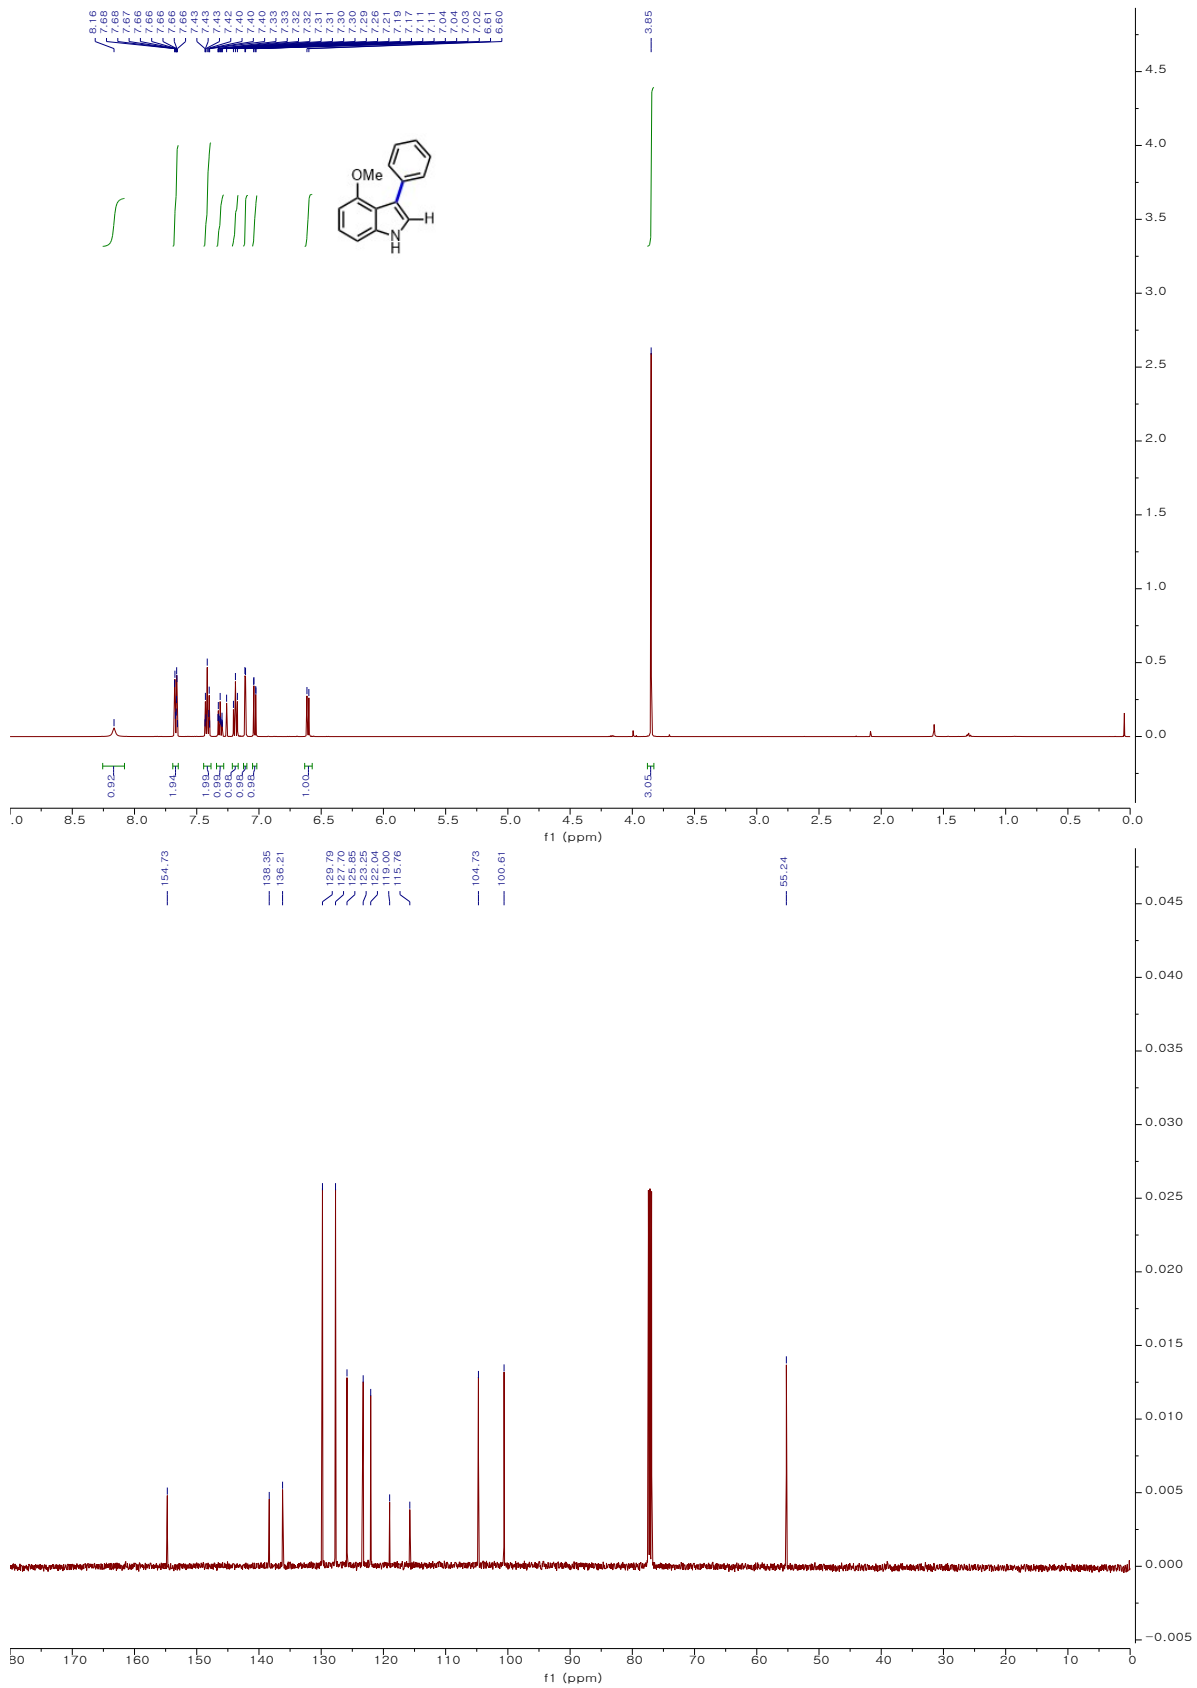

**3-Phenyl-1H-indol-5-yl acetate (4ha);**

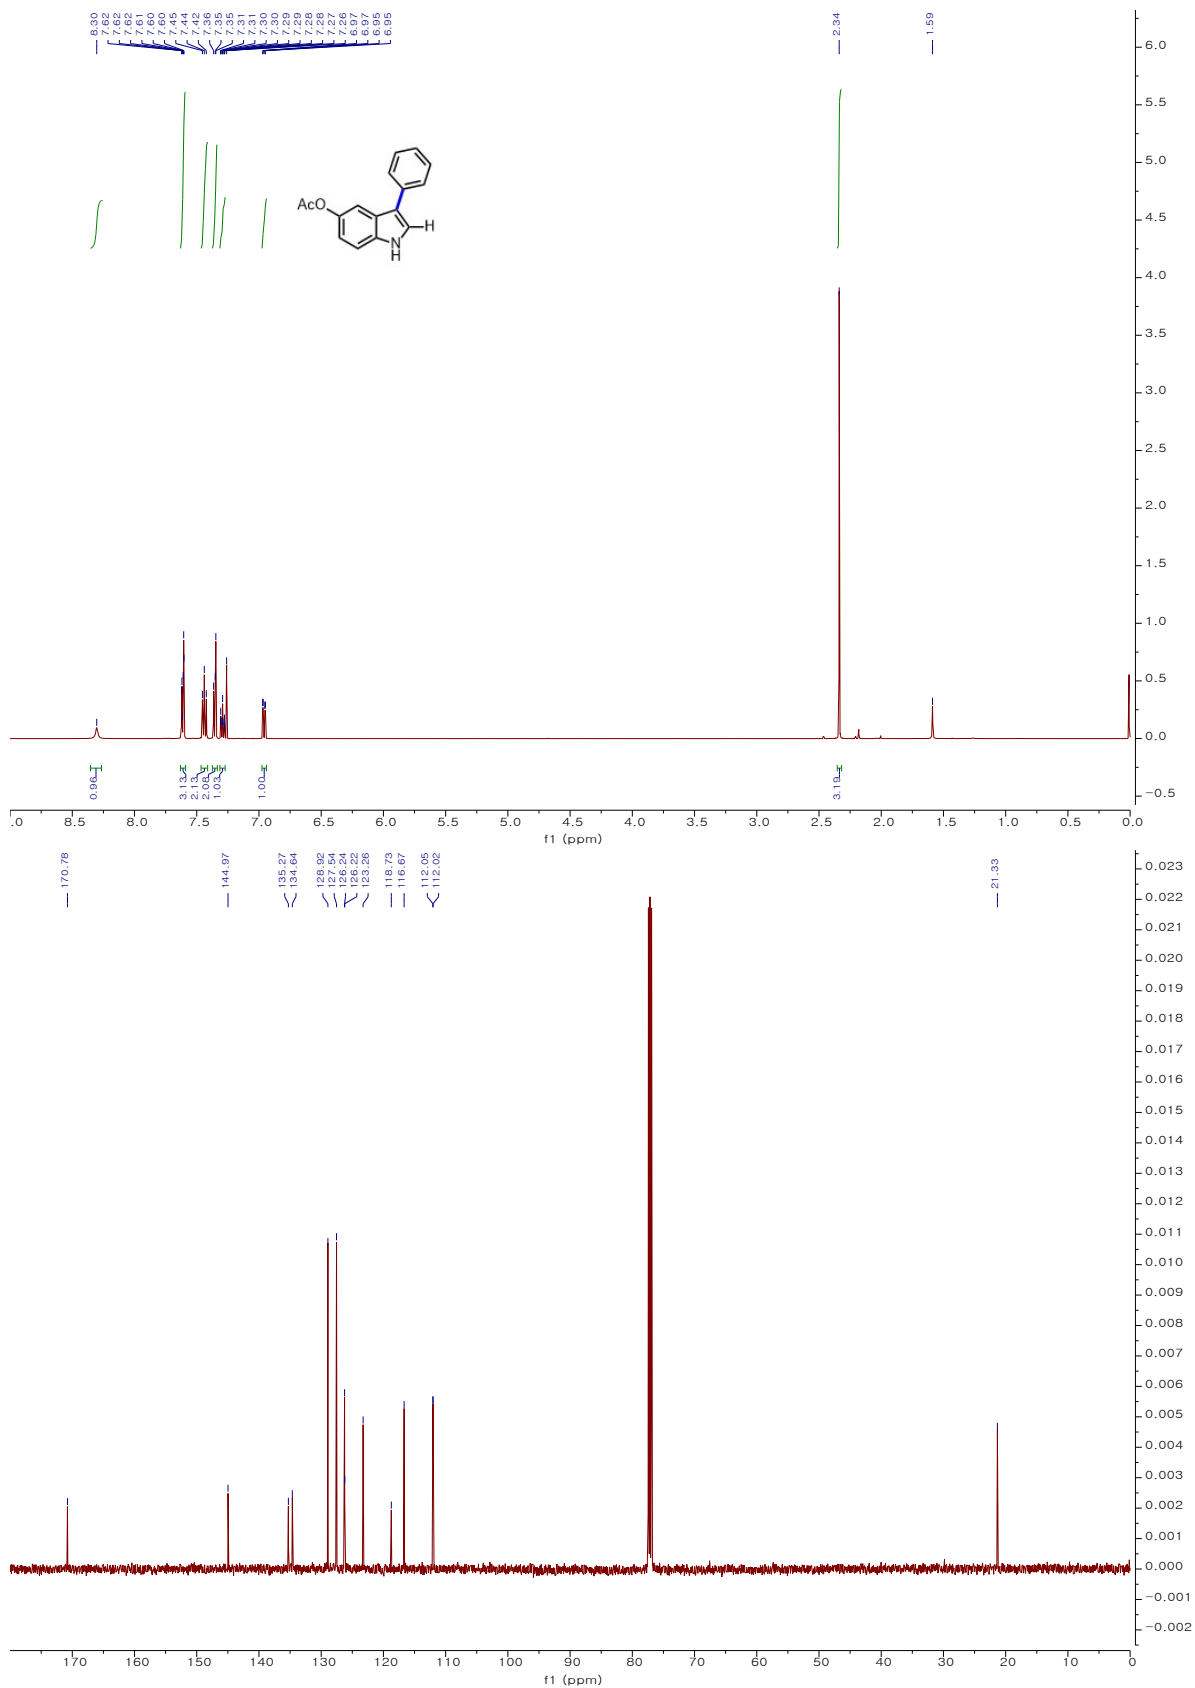

**Methyl 3-phenyl-1H-indole-5-carboxylate (4ia);**

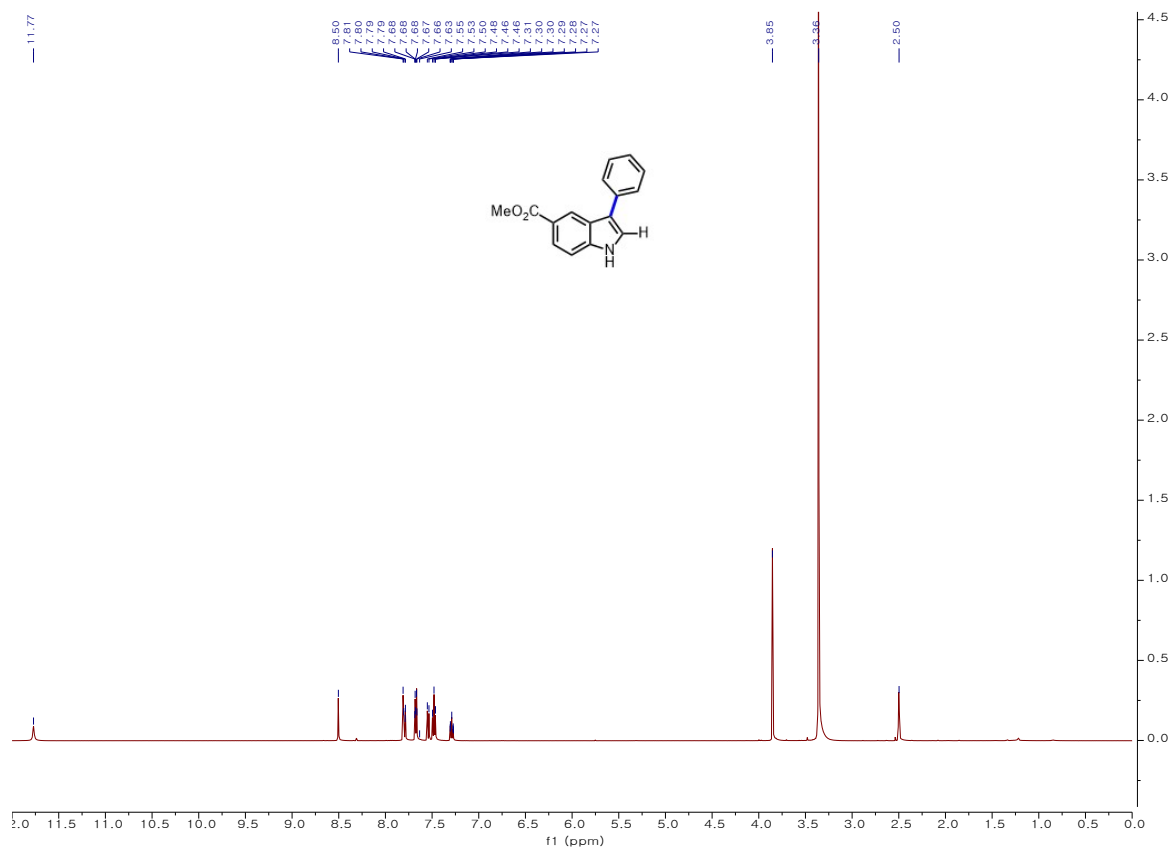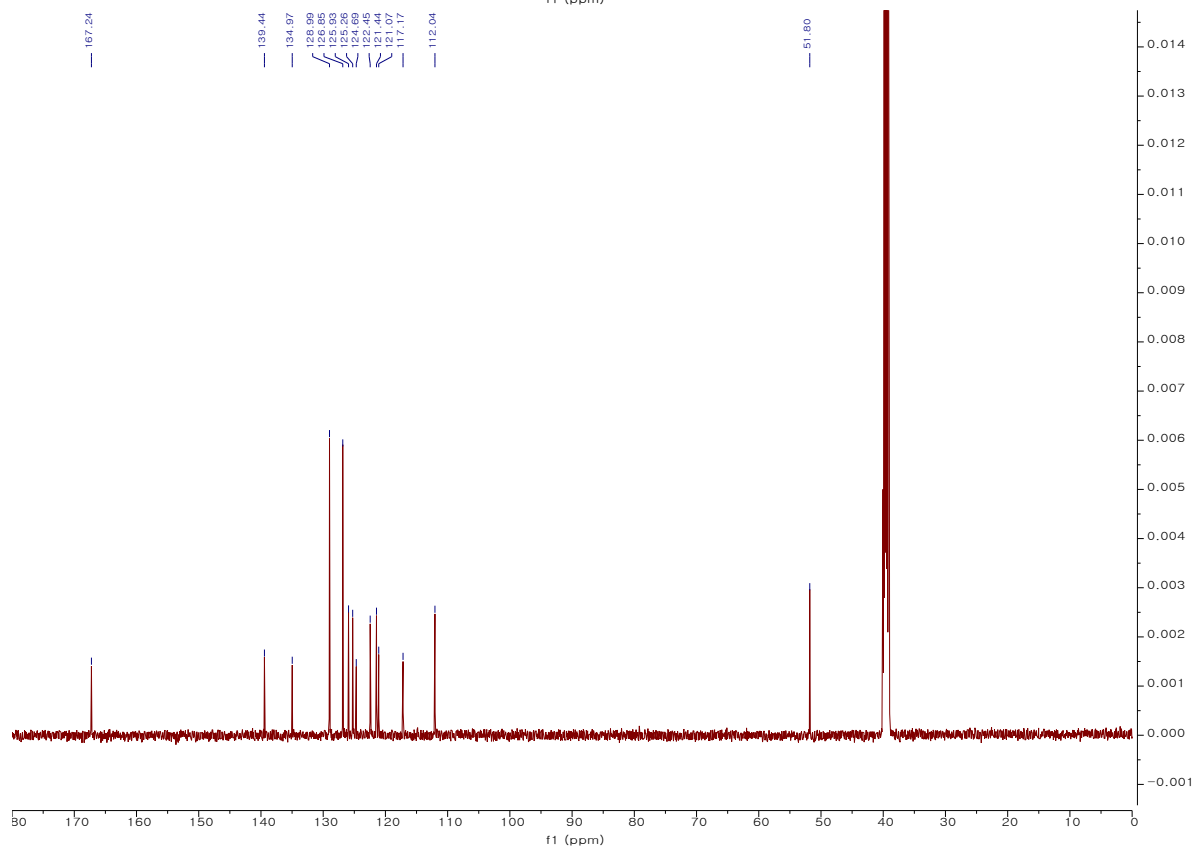

***tert*-Butyl (3-phenyl-1*H*-indol-5-yl)carbamate (4ja);**

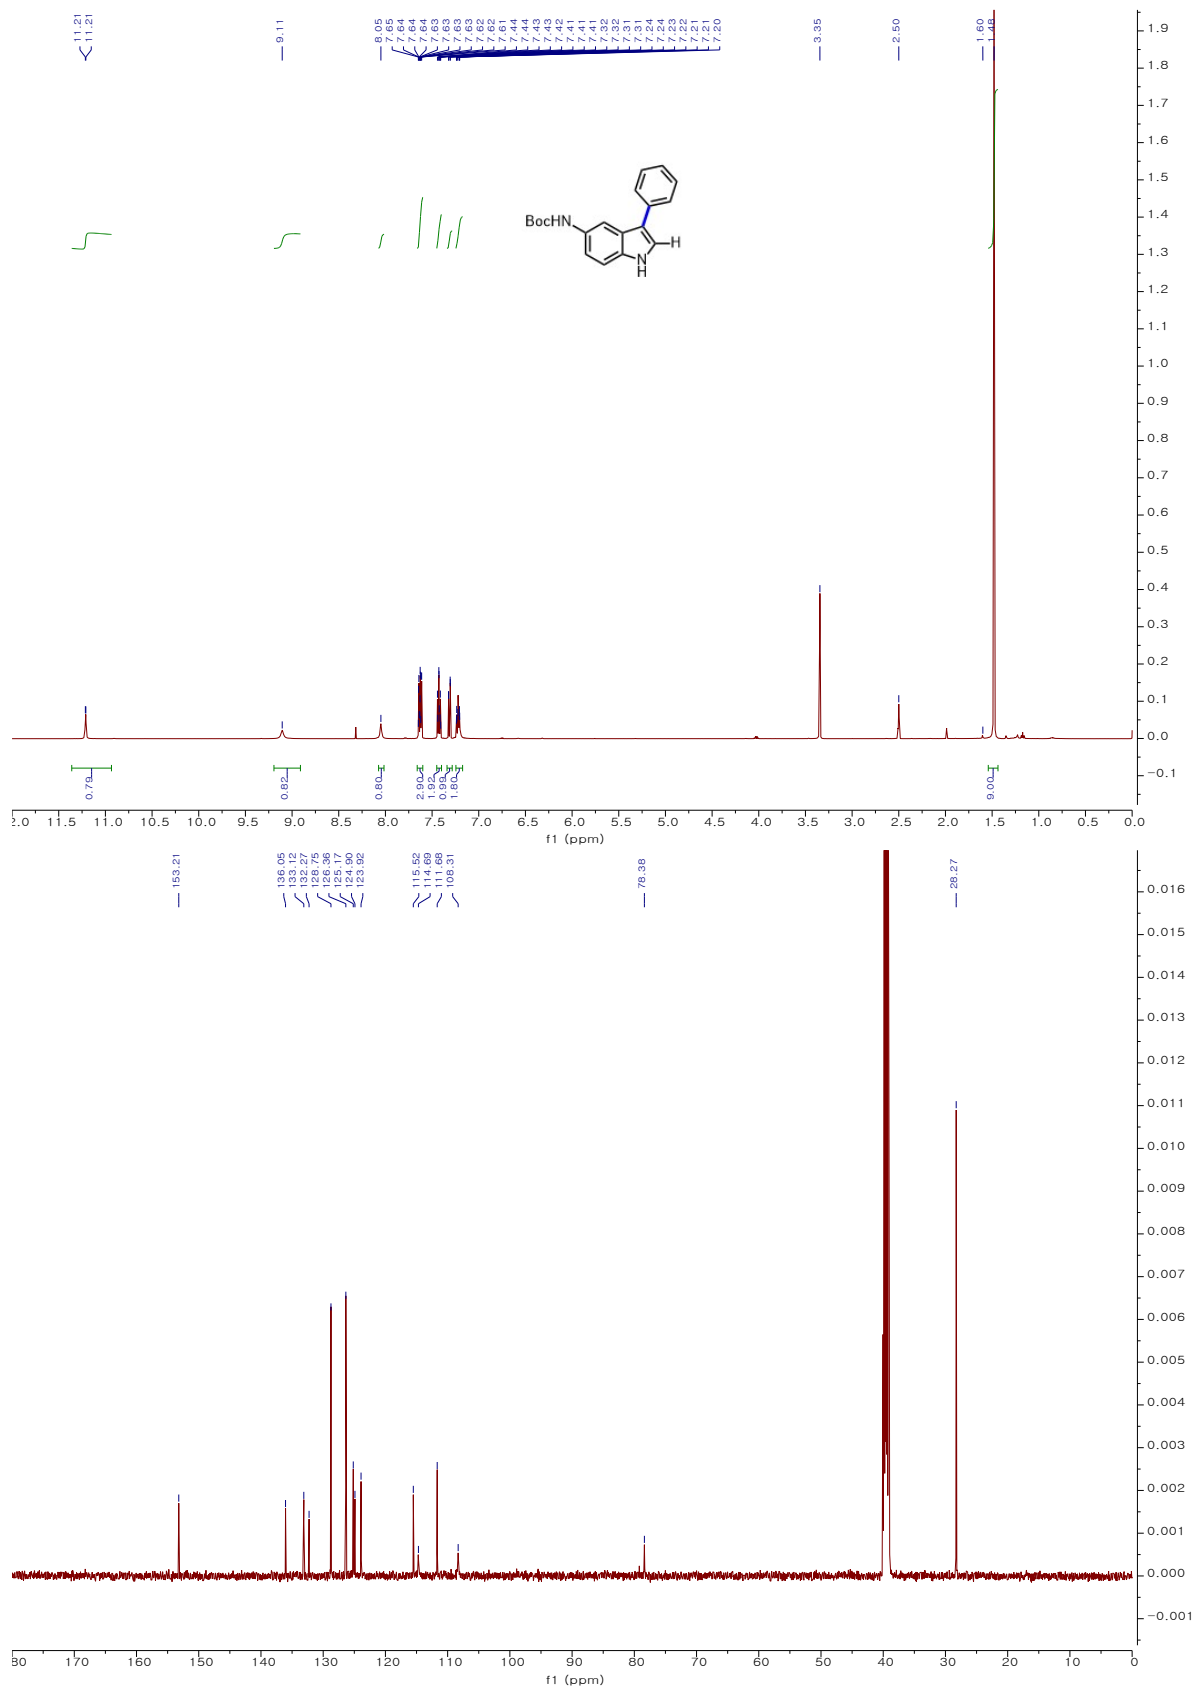

**5-Fluoro-3-phenyl-1H-indole (4ka);**



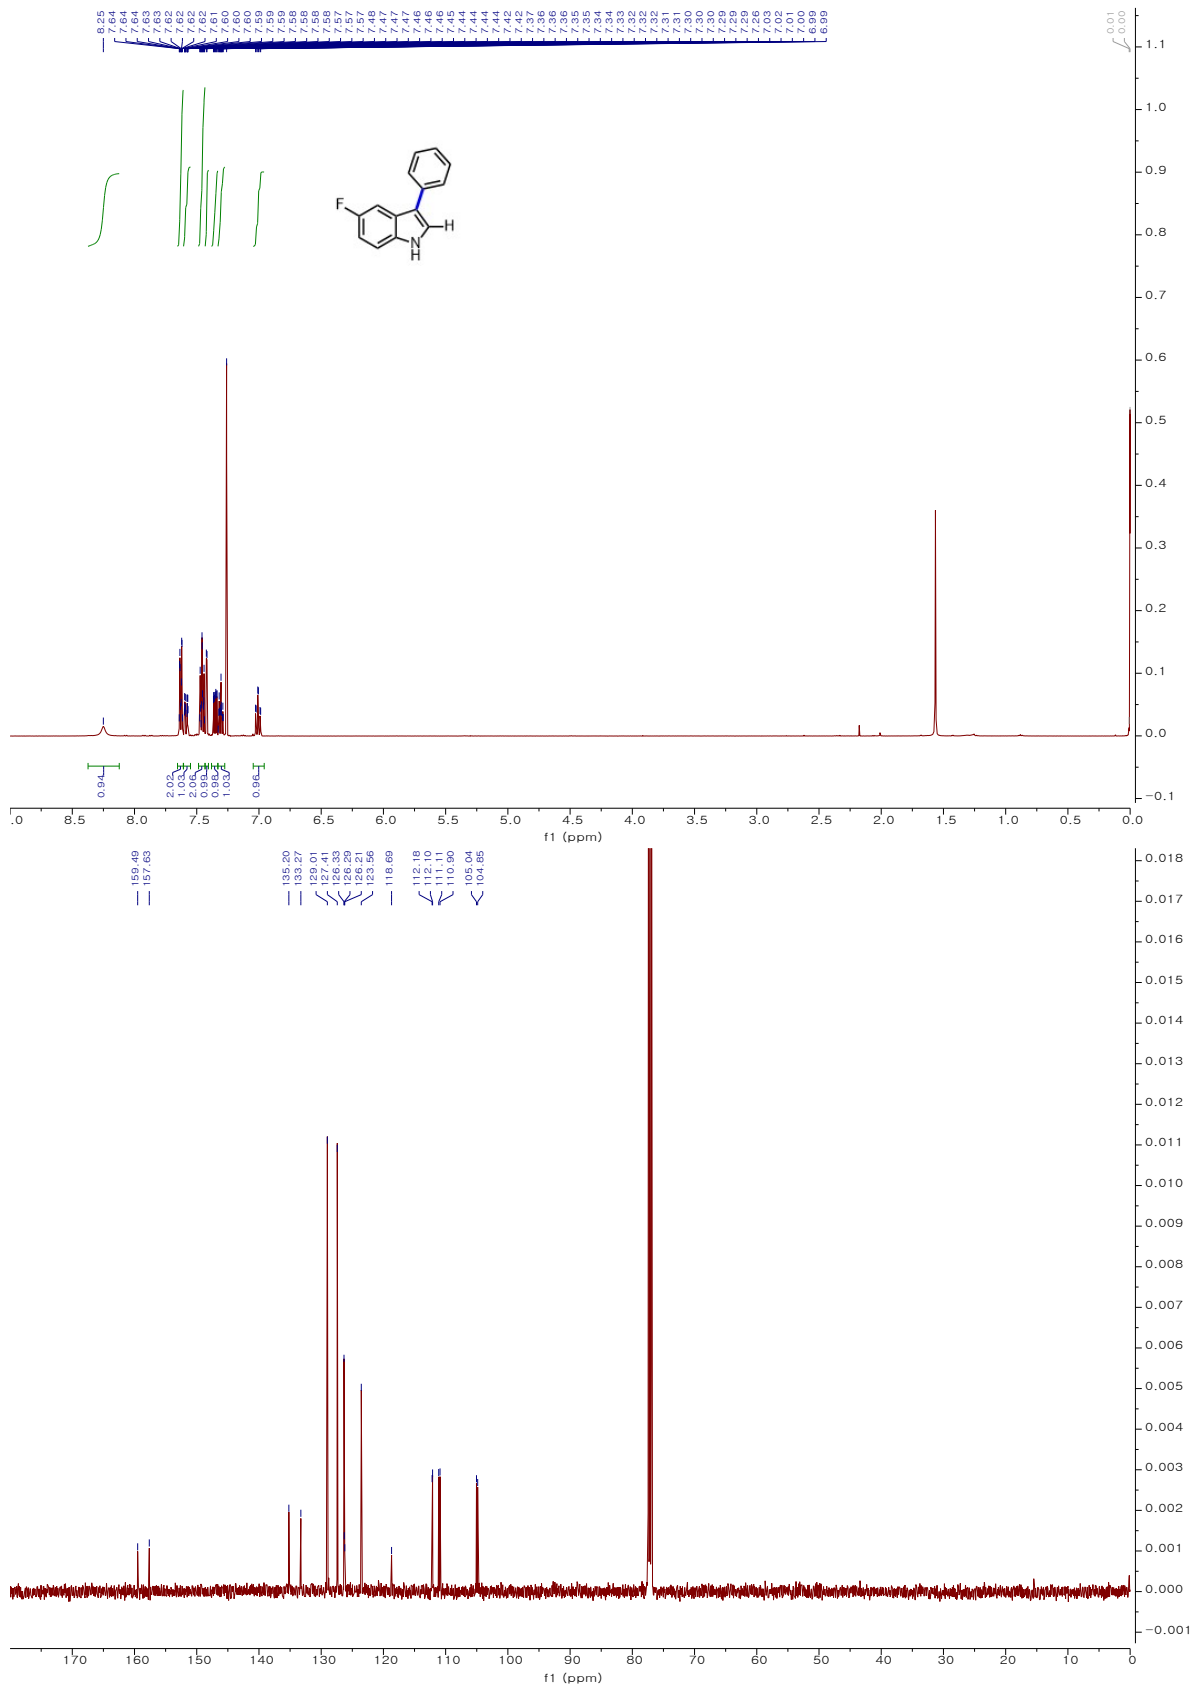

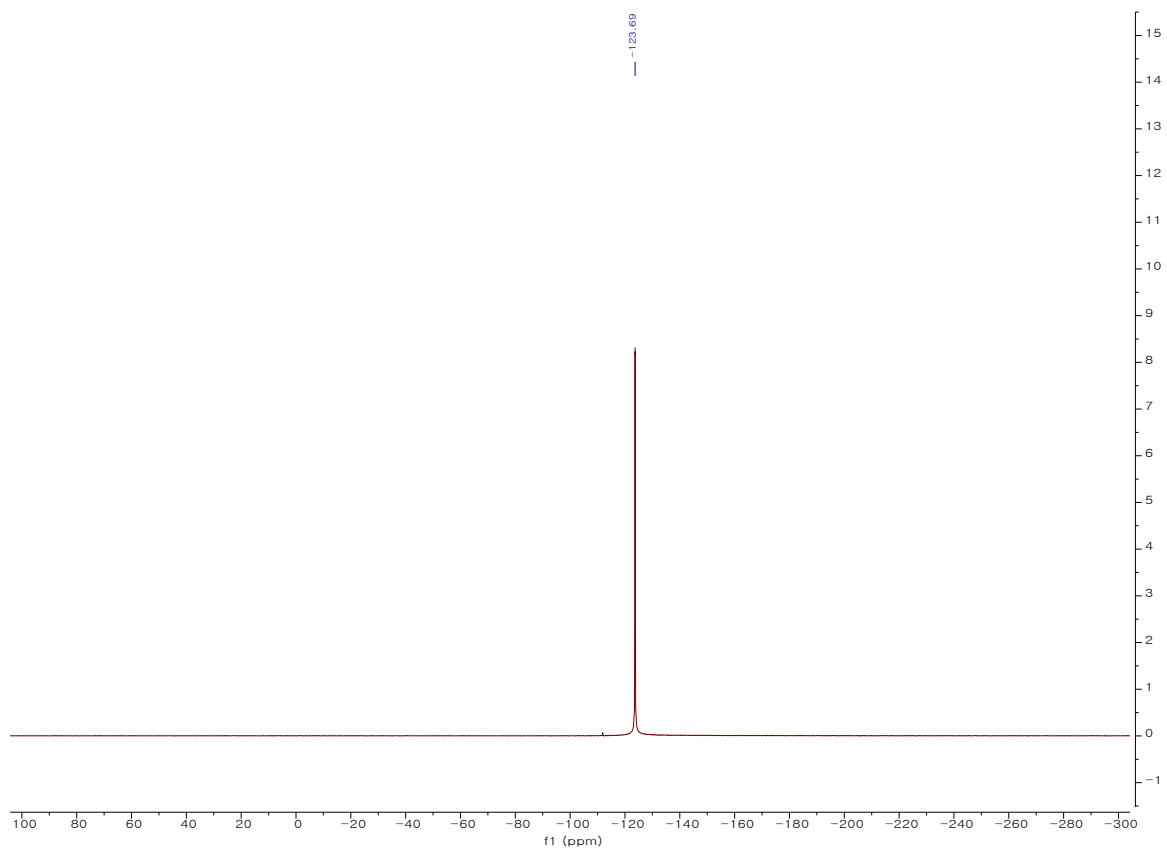



### 5-Bromo-3-phenyl-1H-indole (4ma);

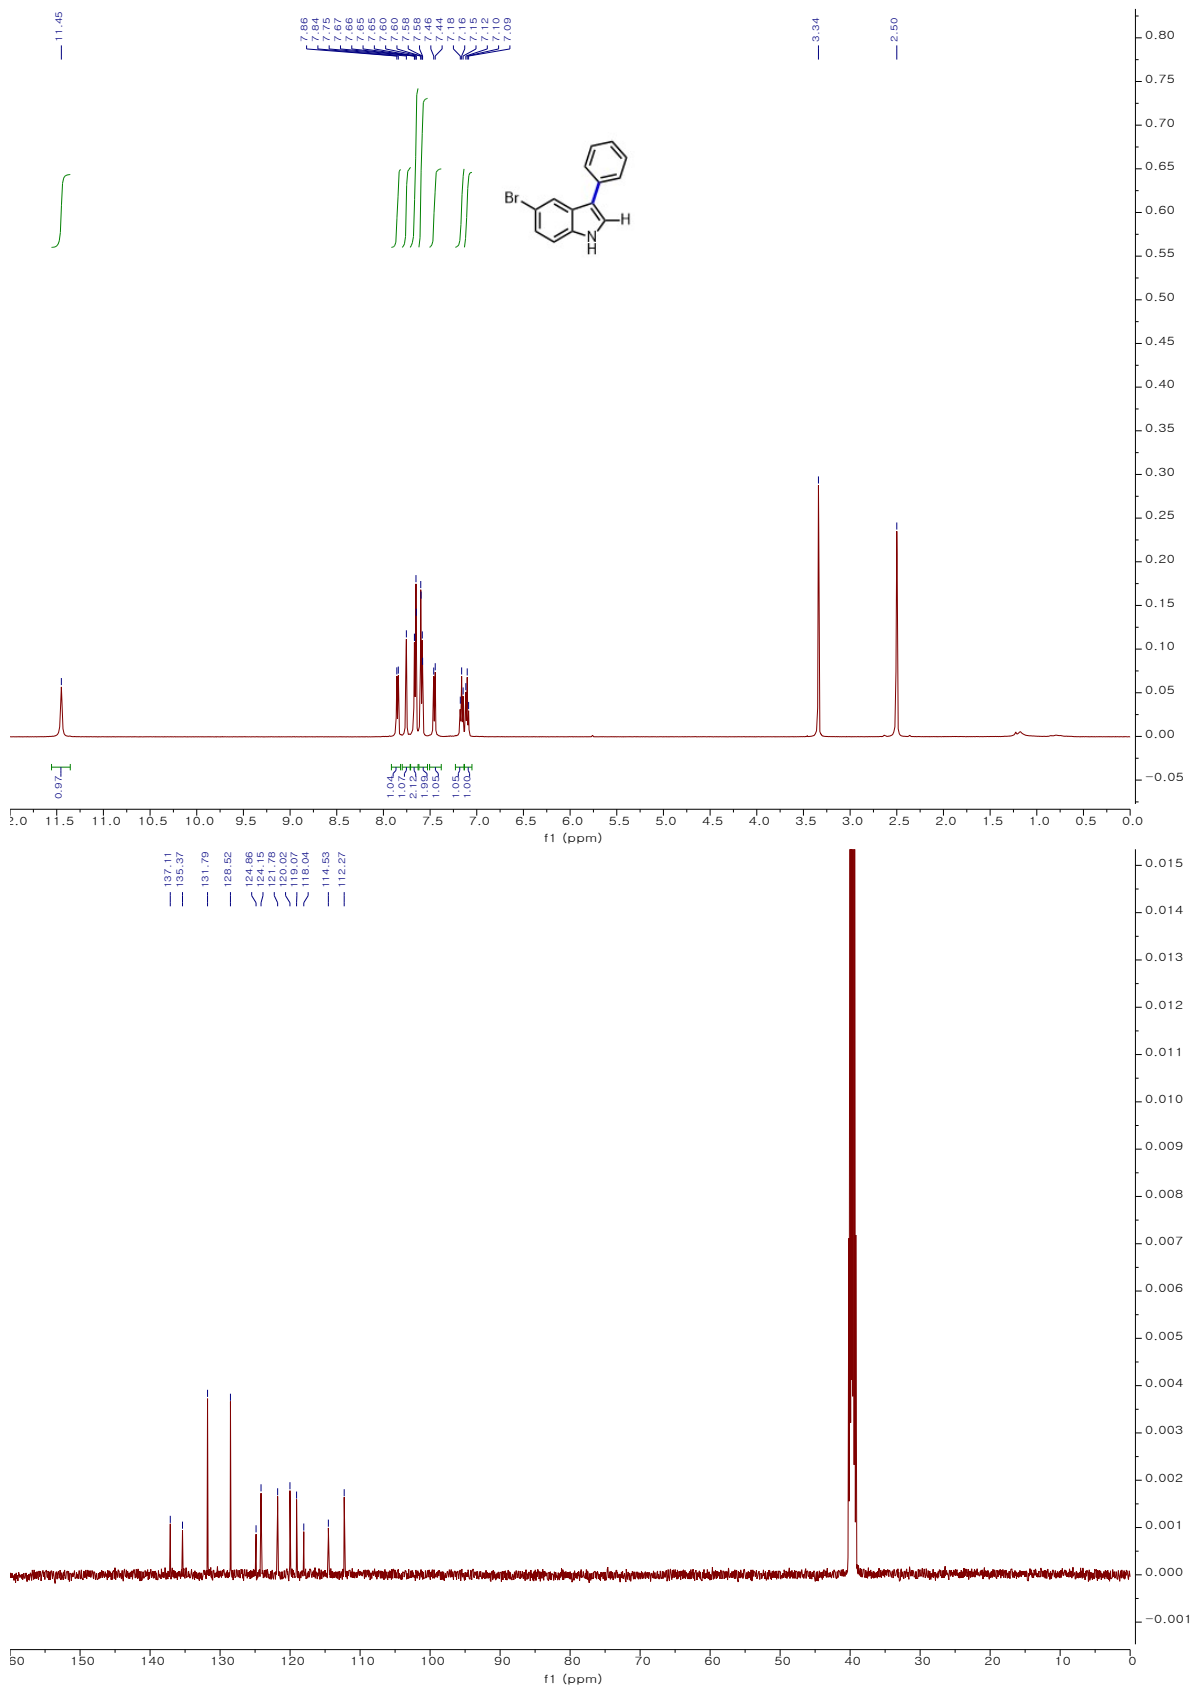

3-(*p*-Tolyl)-1*H*-indole (4ab);

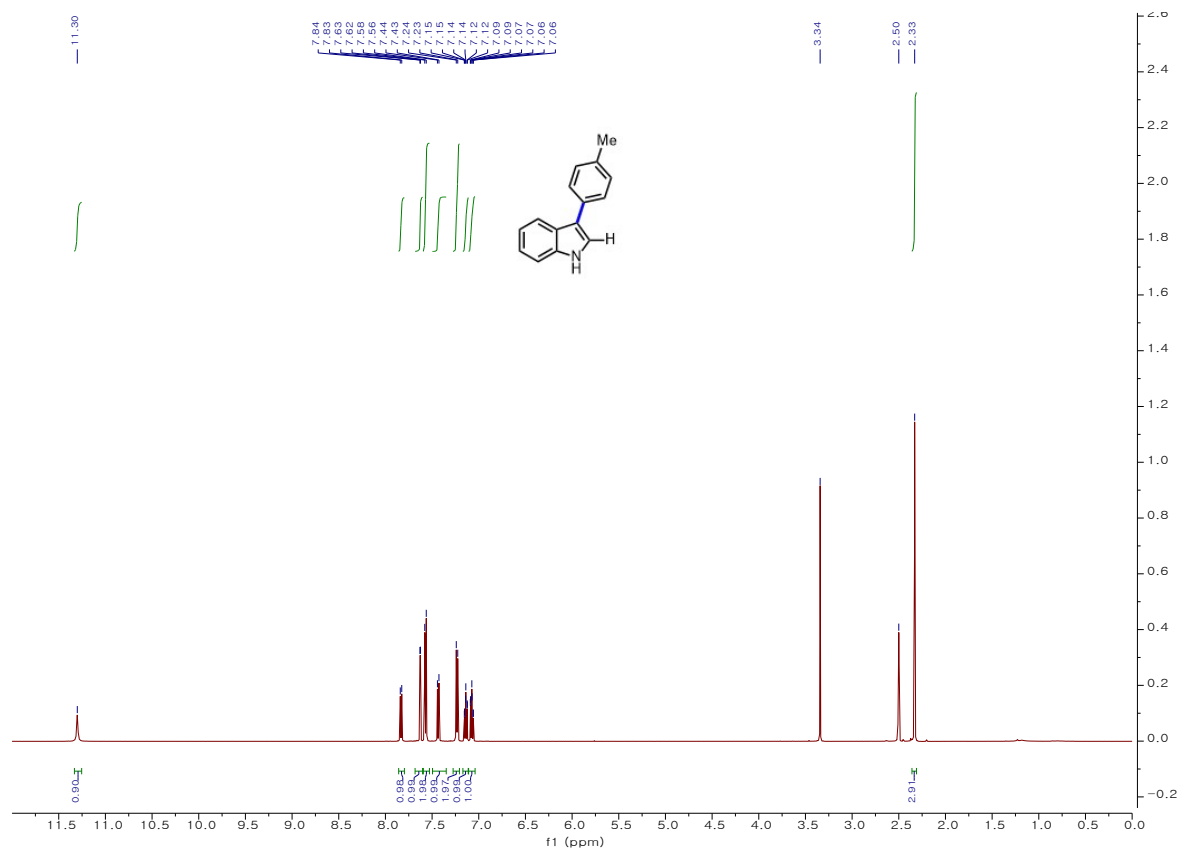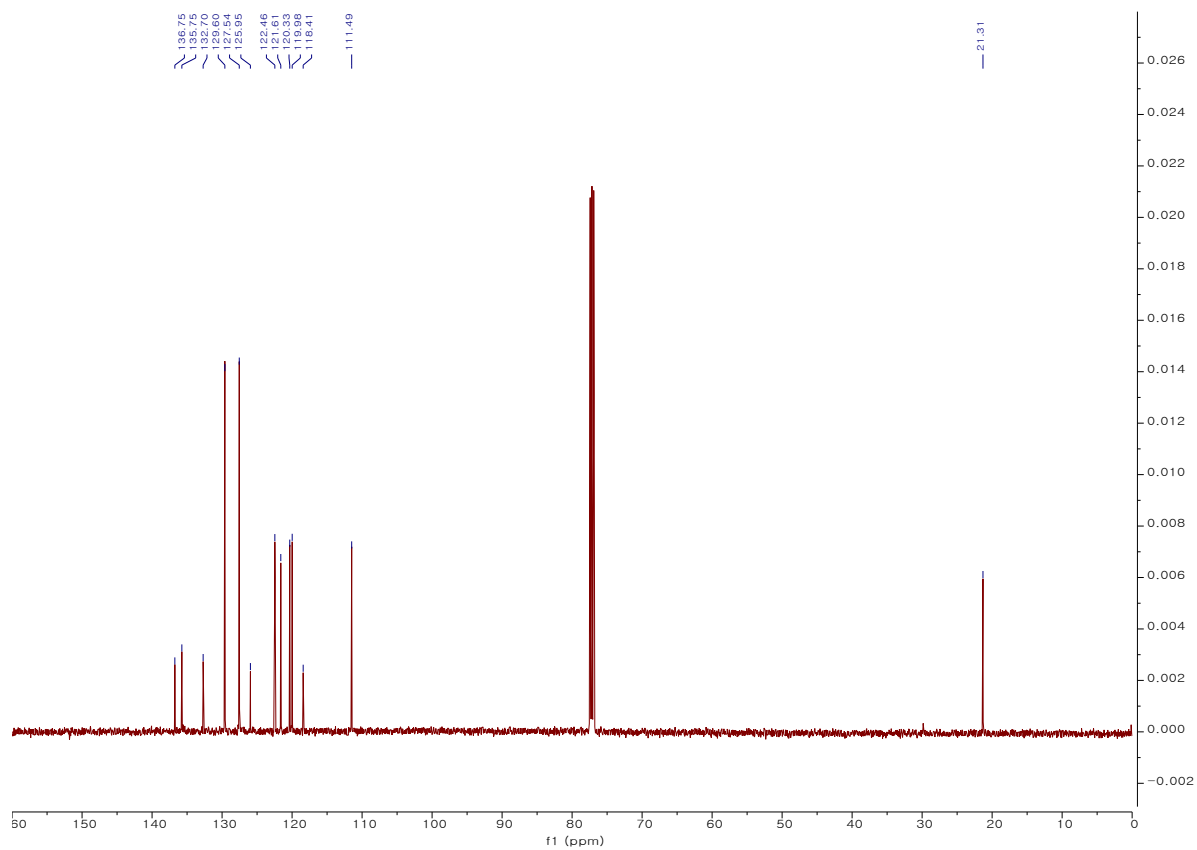

### 3-(4-Methoxyphenyl)-1H-indole (4ac);

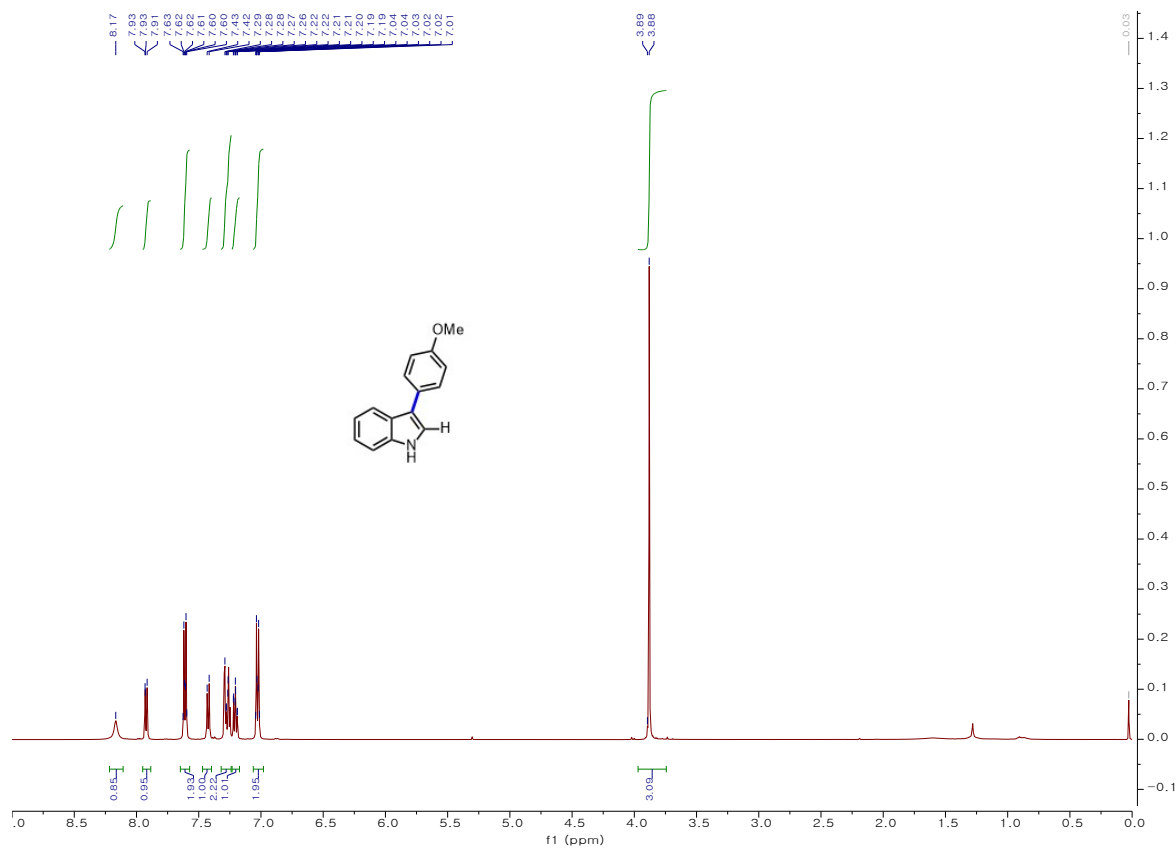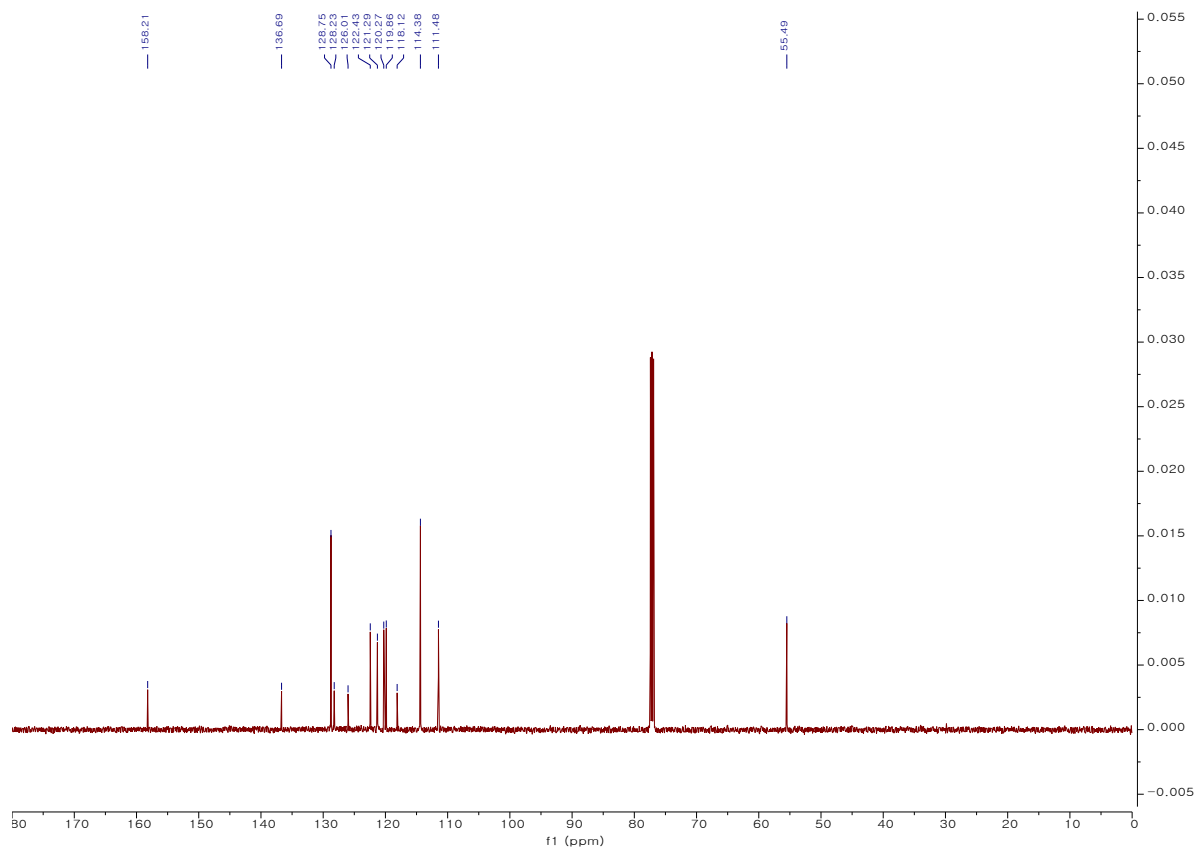

**3-(4-Fluorophenyl)-1H-indole (4ad);**

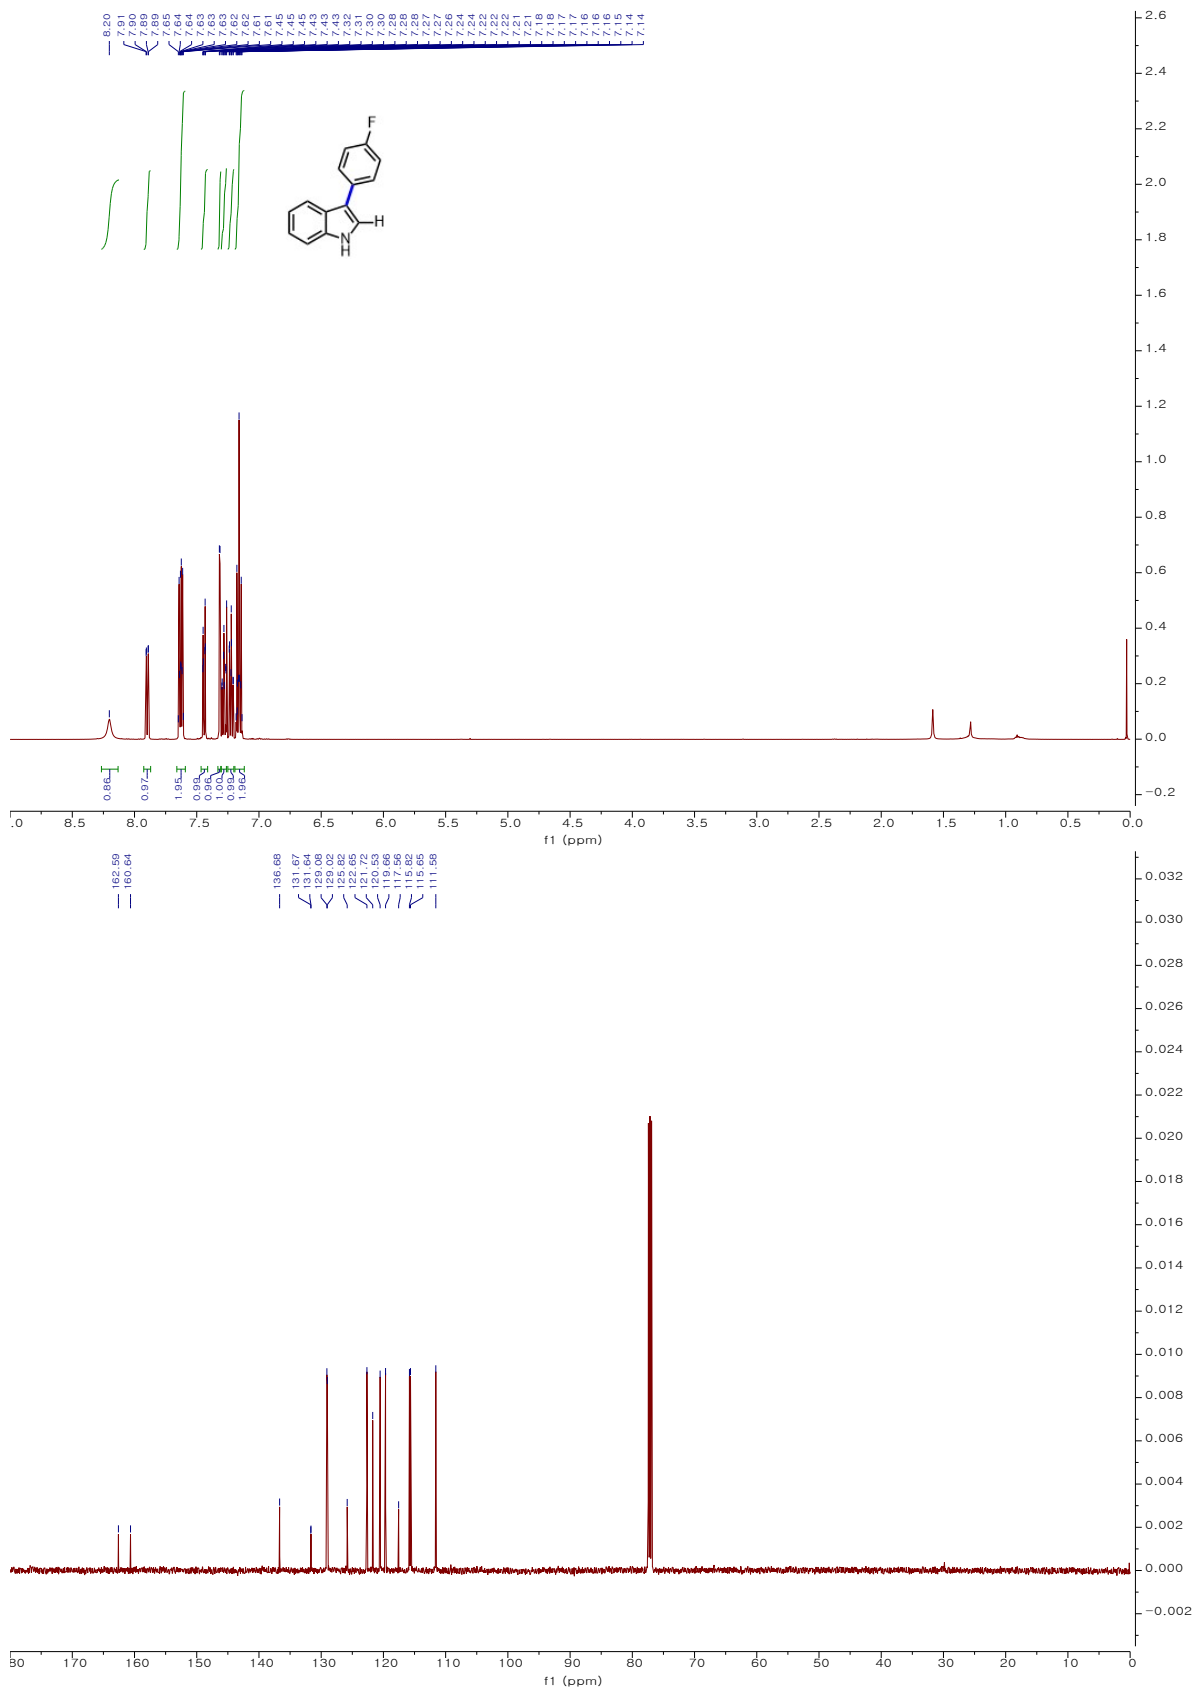

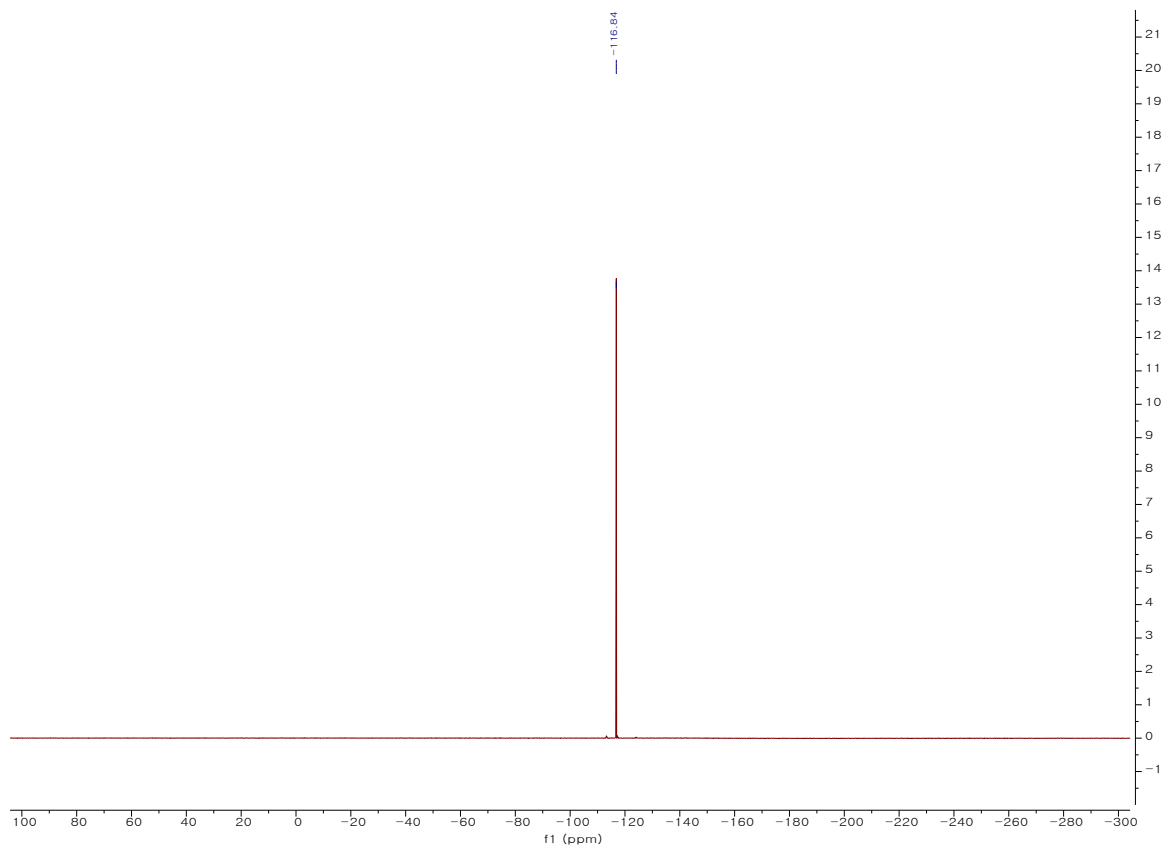



**3-(4-Chlorophenyl)-1H-indole (4ae);**

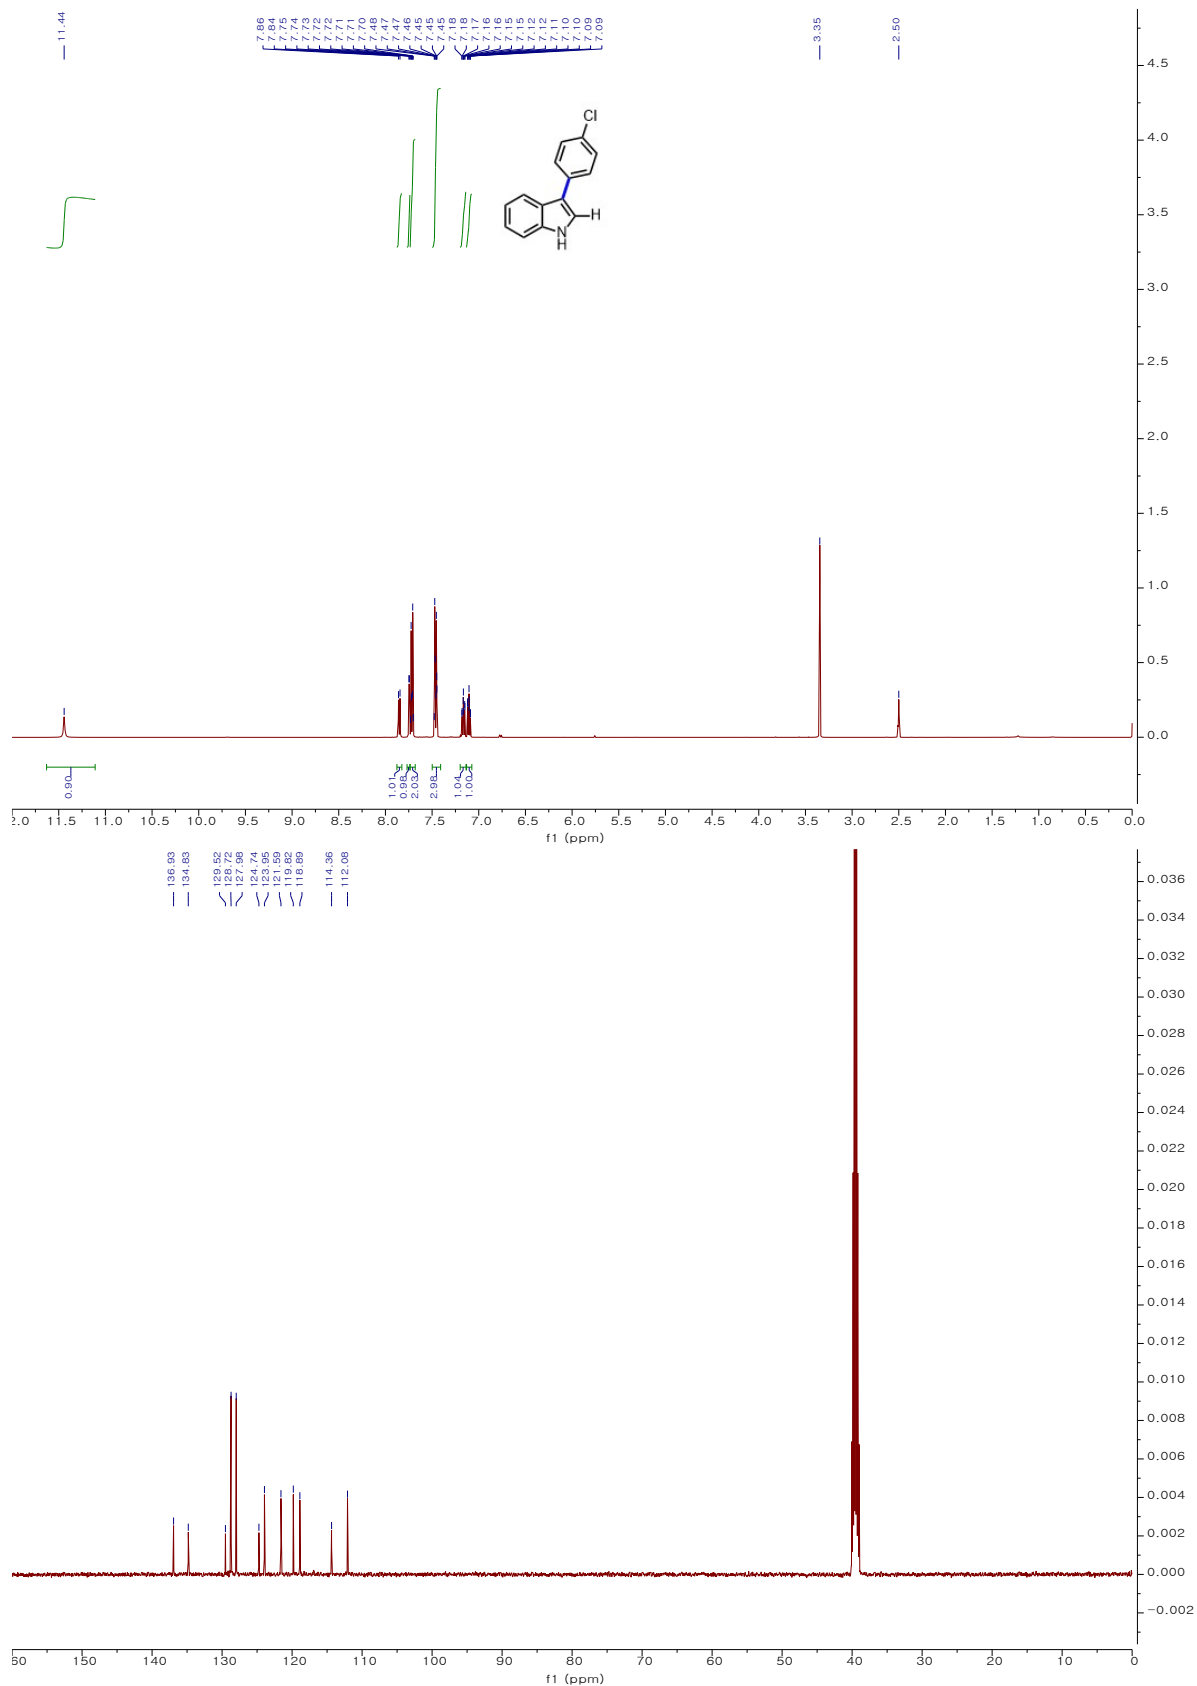

**3-(4-Bromophenyl)-1H-indole (4af);**

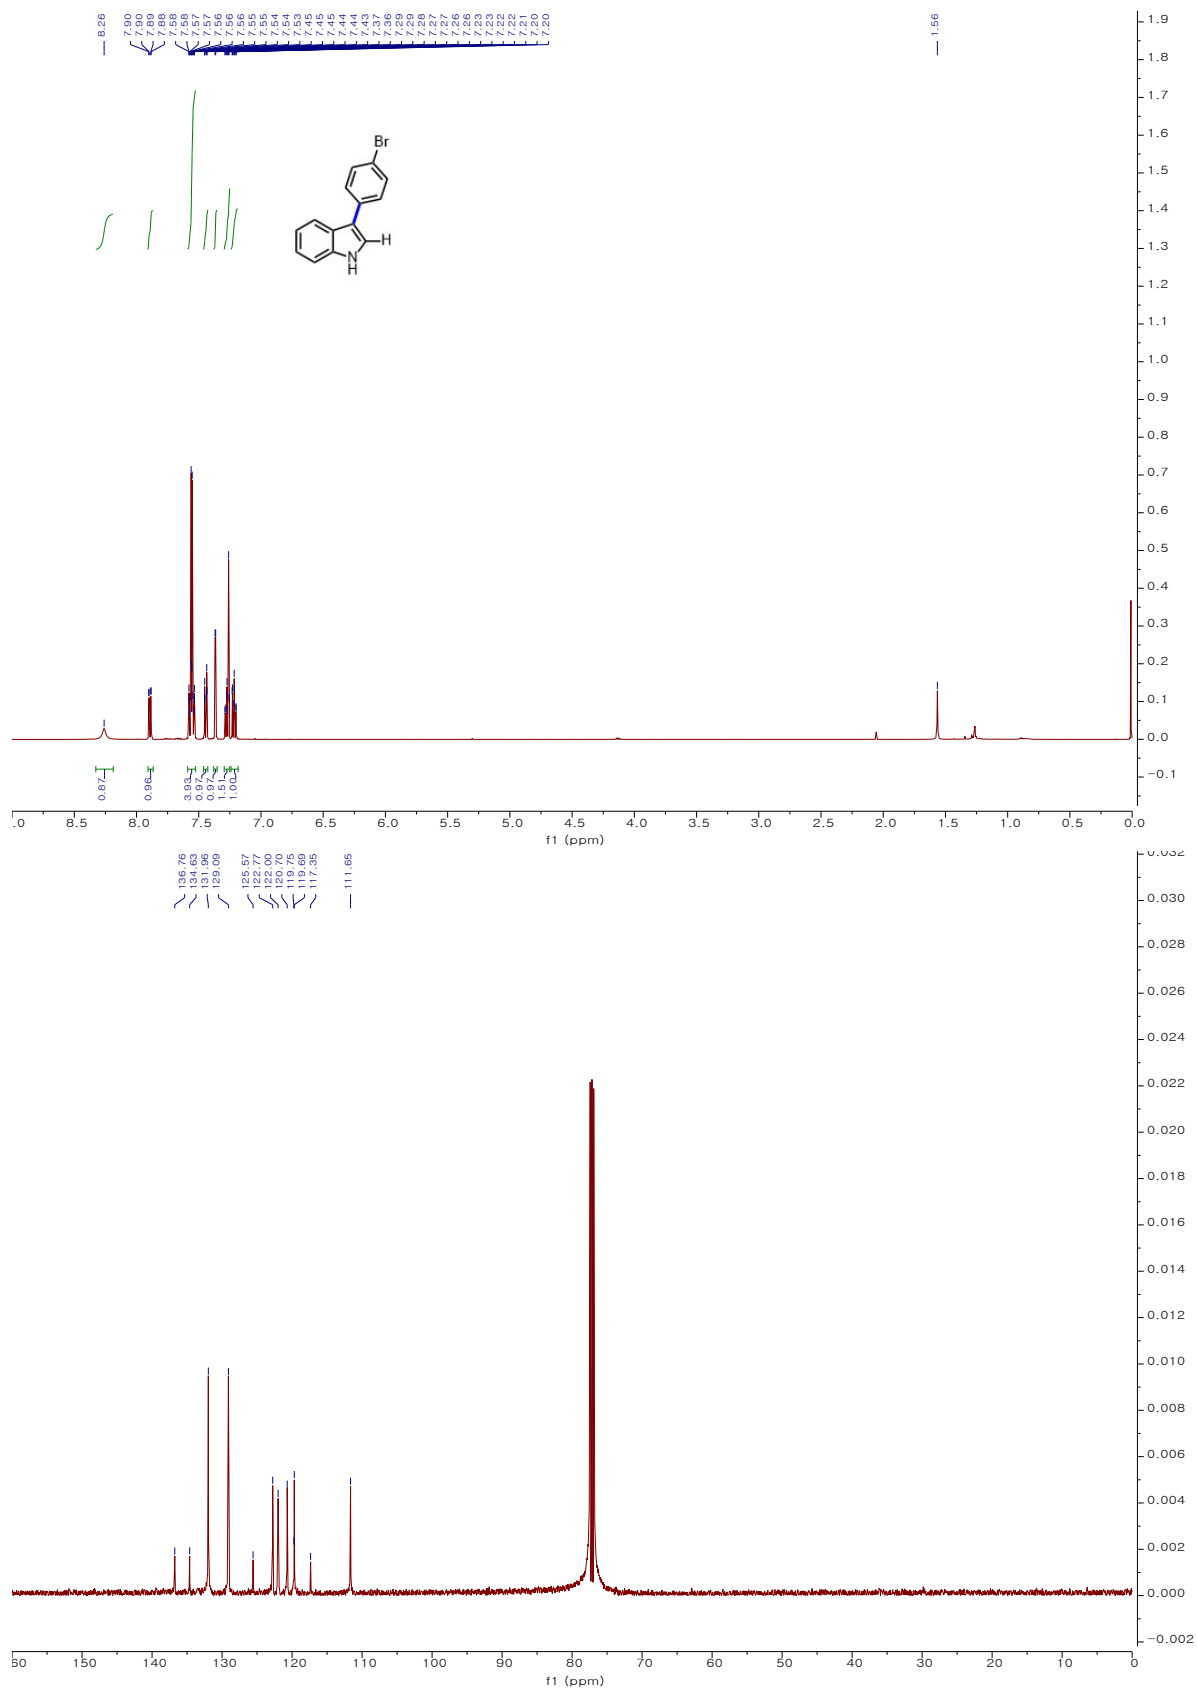

**3-(4-(Trifluoromethyl)phenyl)-1H-indole (4ag);**

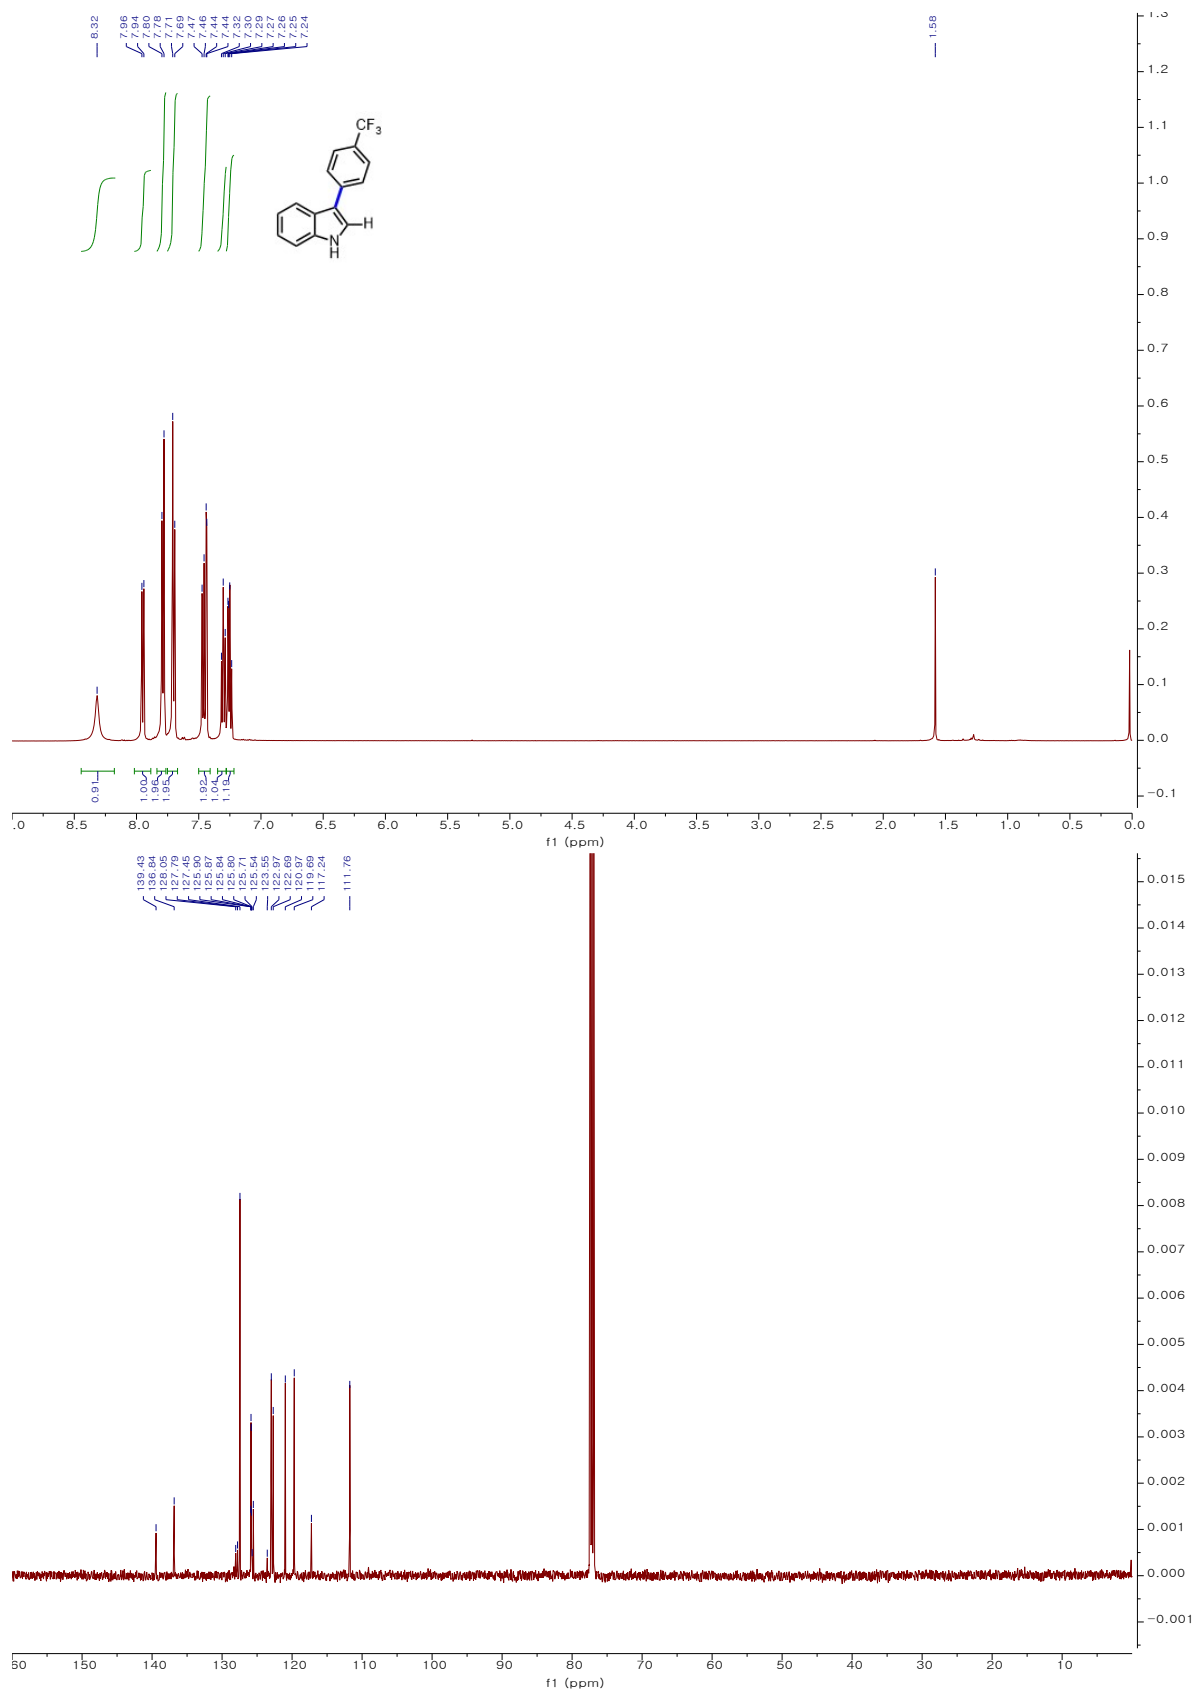

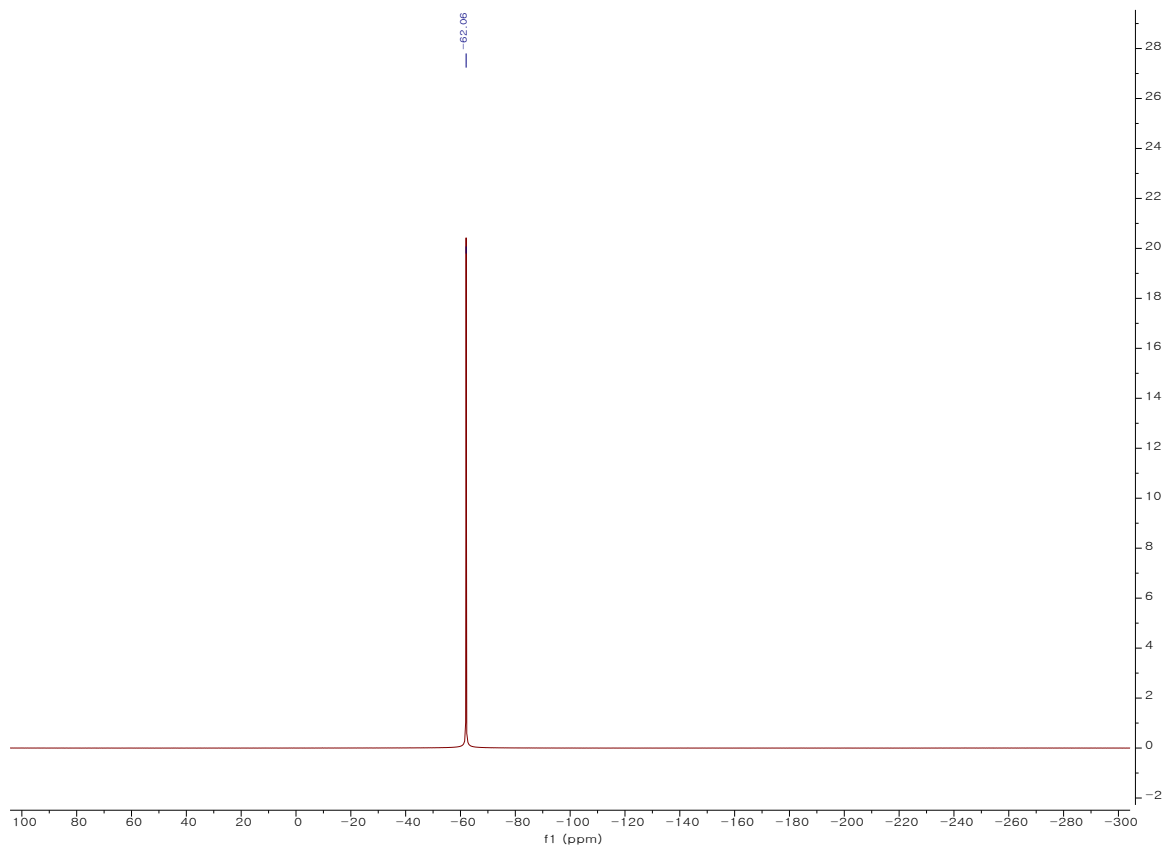

3-(1H-Indol-3-yl)phenol (4ah);

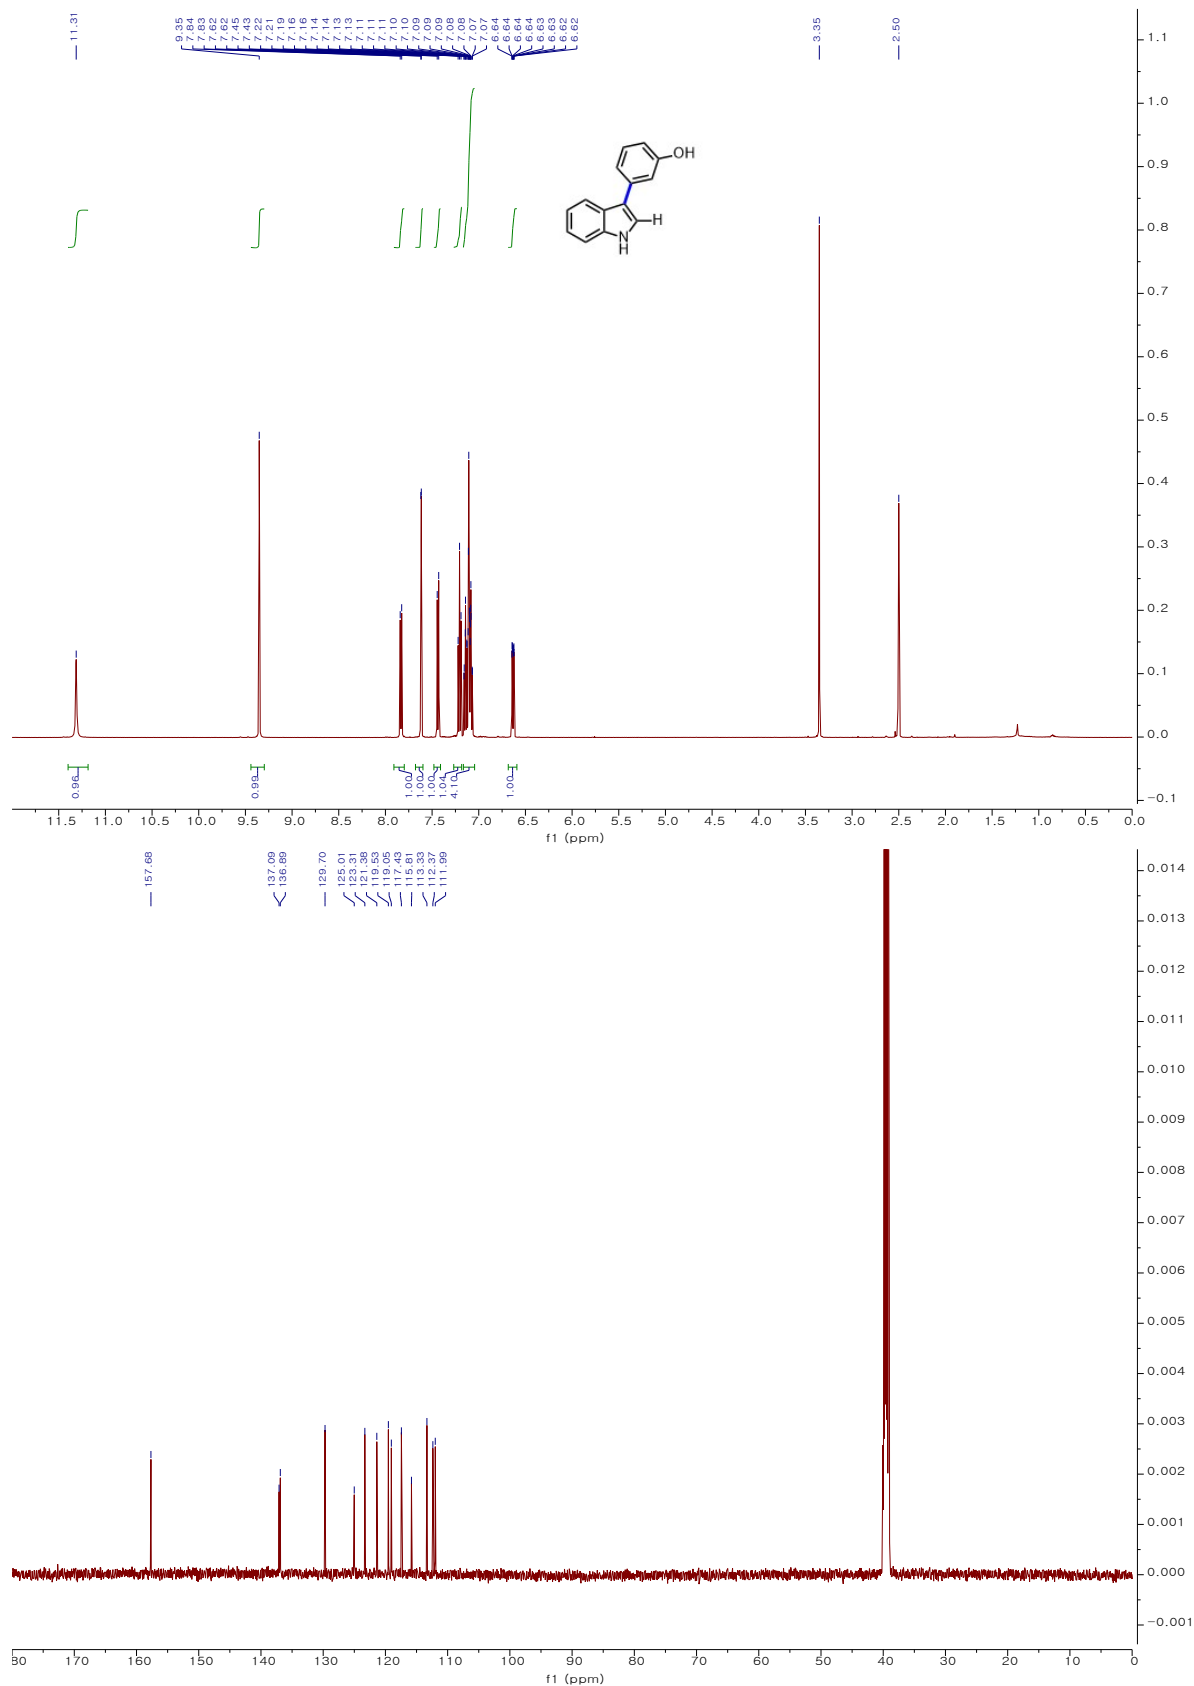



4-(1H-Indol-3-yl)phenyl acetate (4aj);

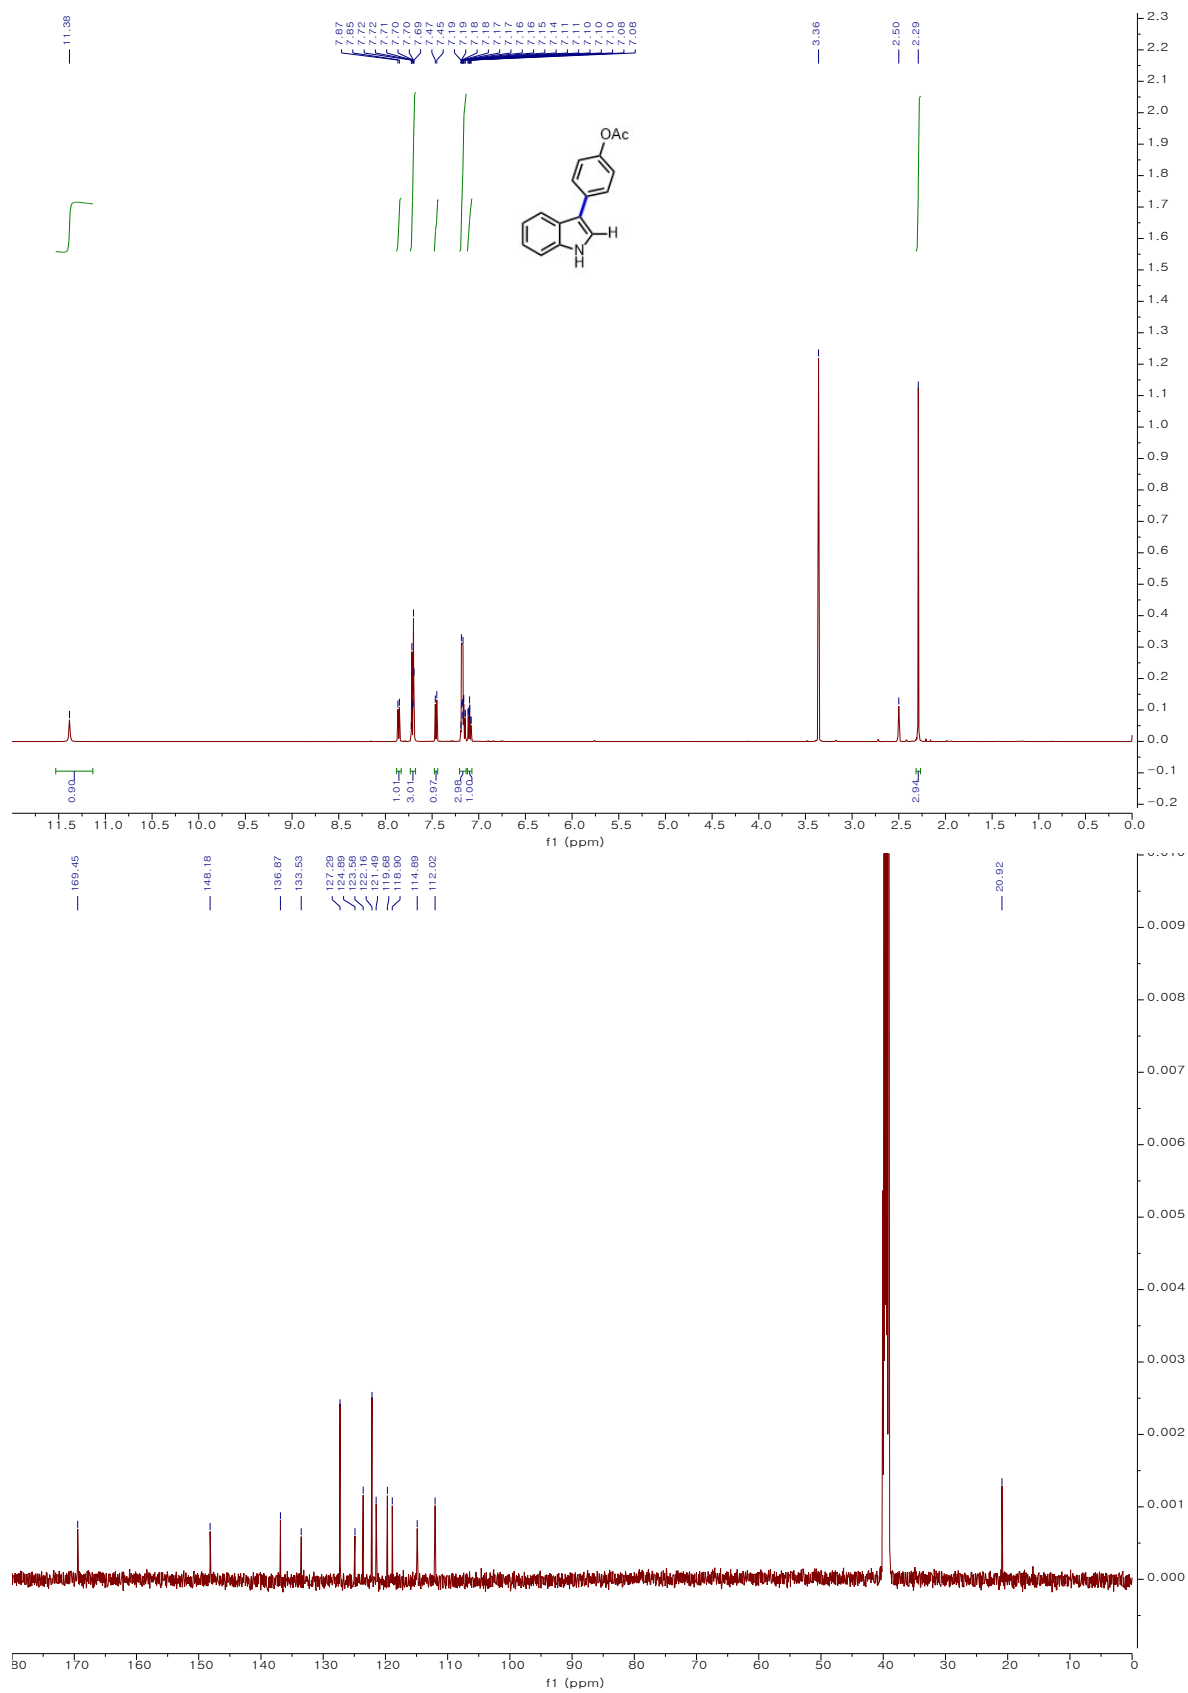

3-(Benzo[d][1,3]dioxol-5-yl)-1H-indole (4ak);

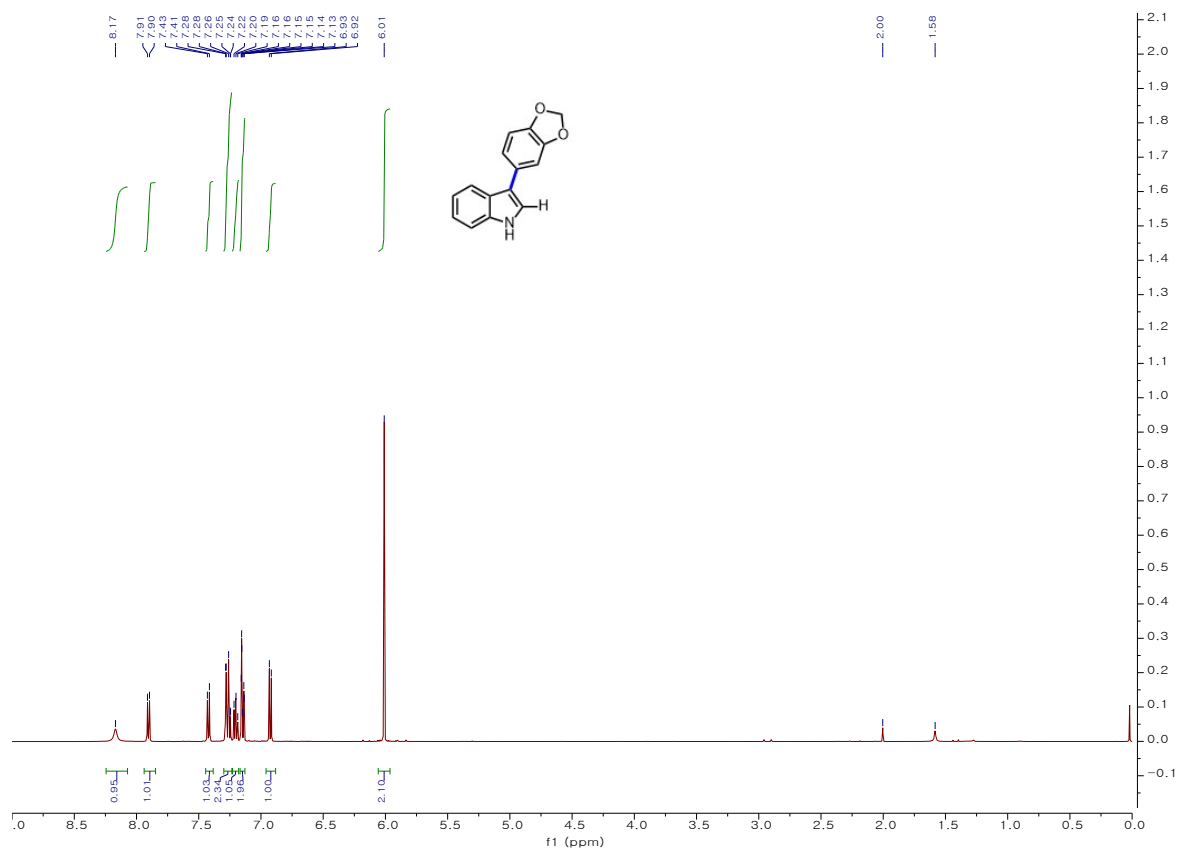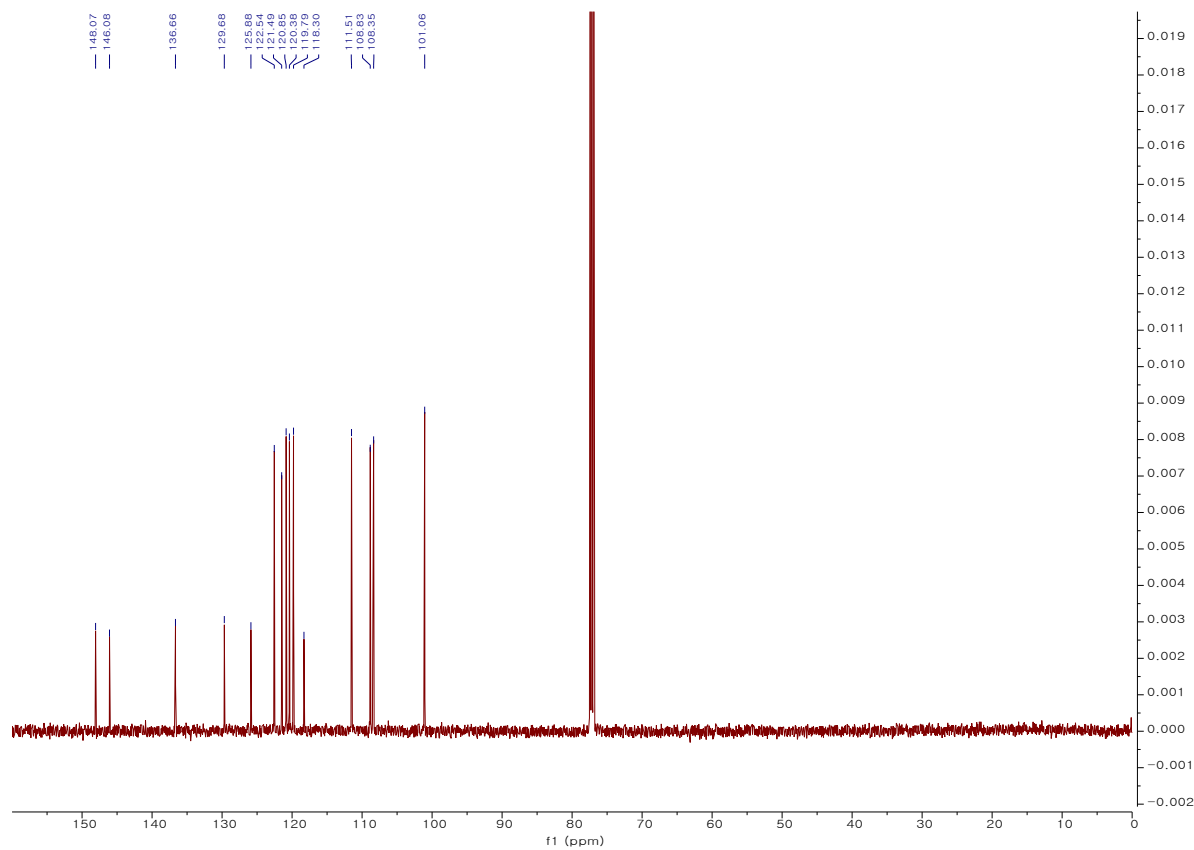



**3-(Naphthalen-2-yl)-1H-indole (4aI);**

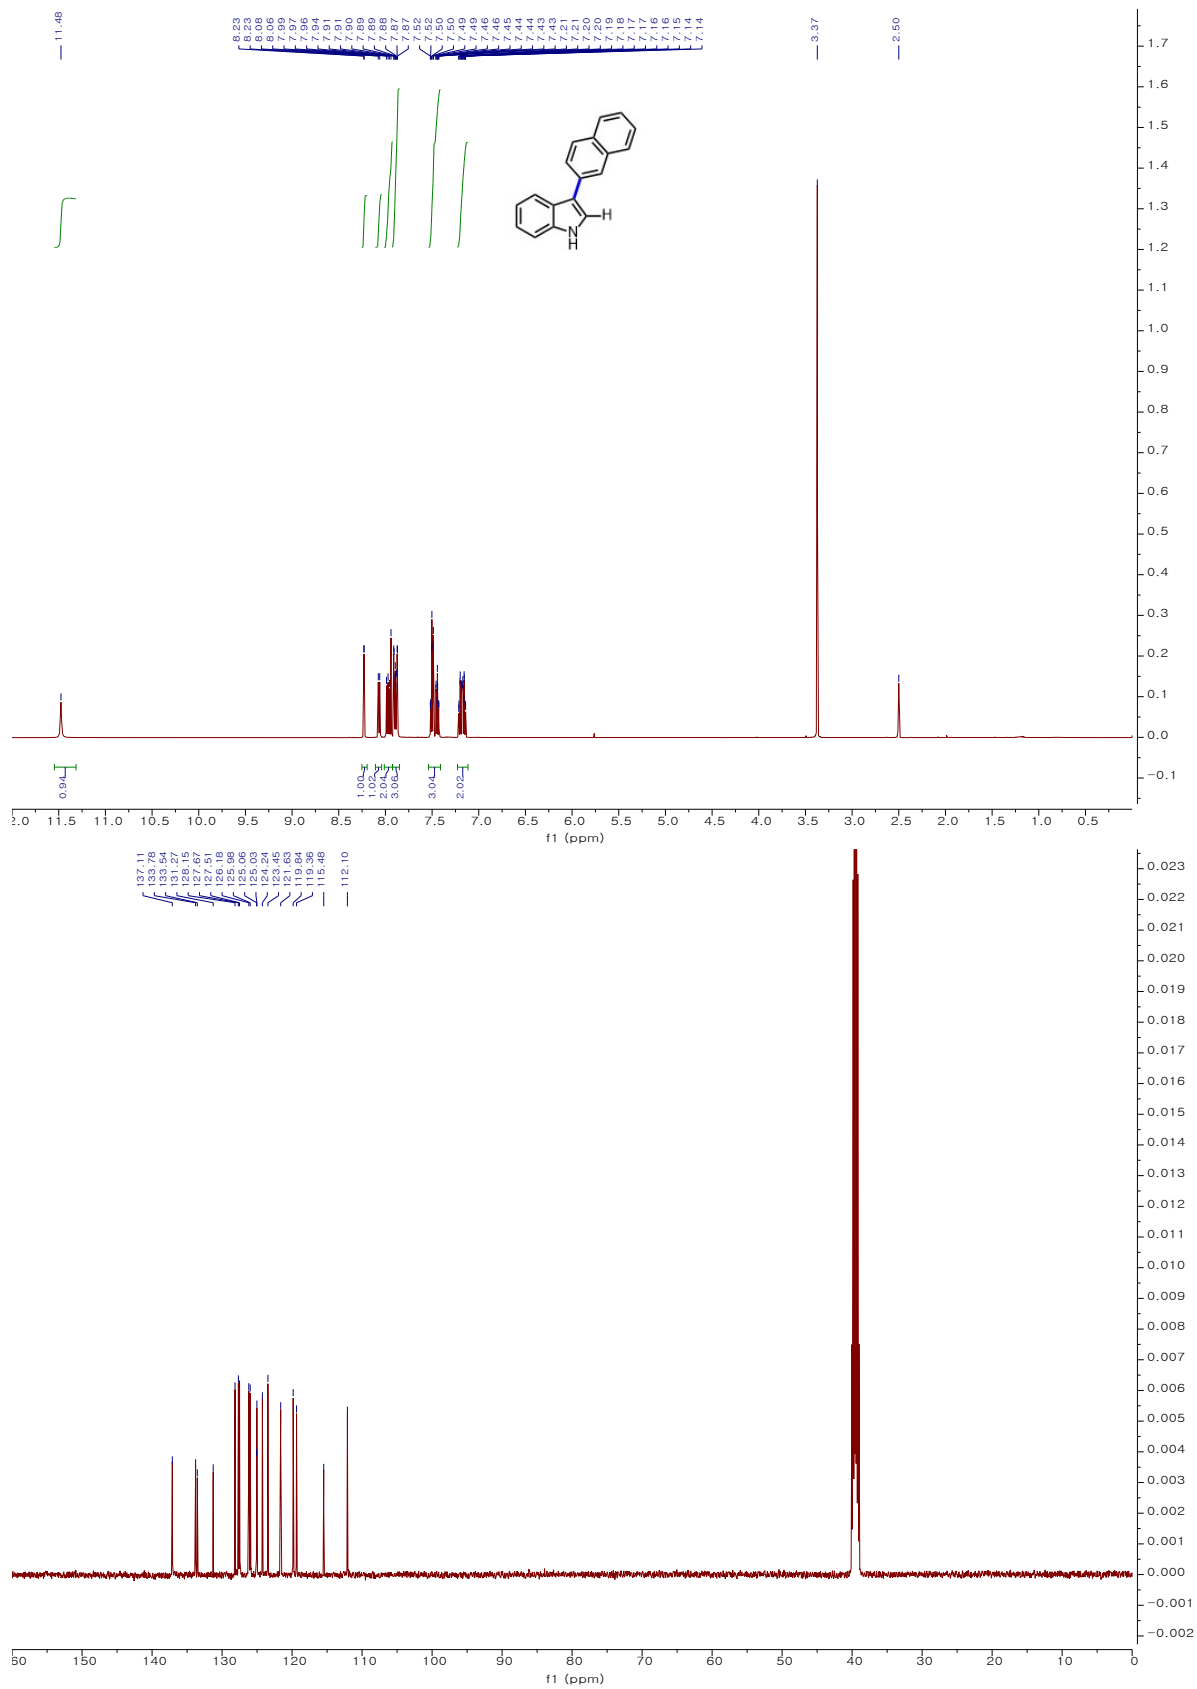

**3-(Naphthalen-1-yl)-1H-indole (4am);**

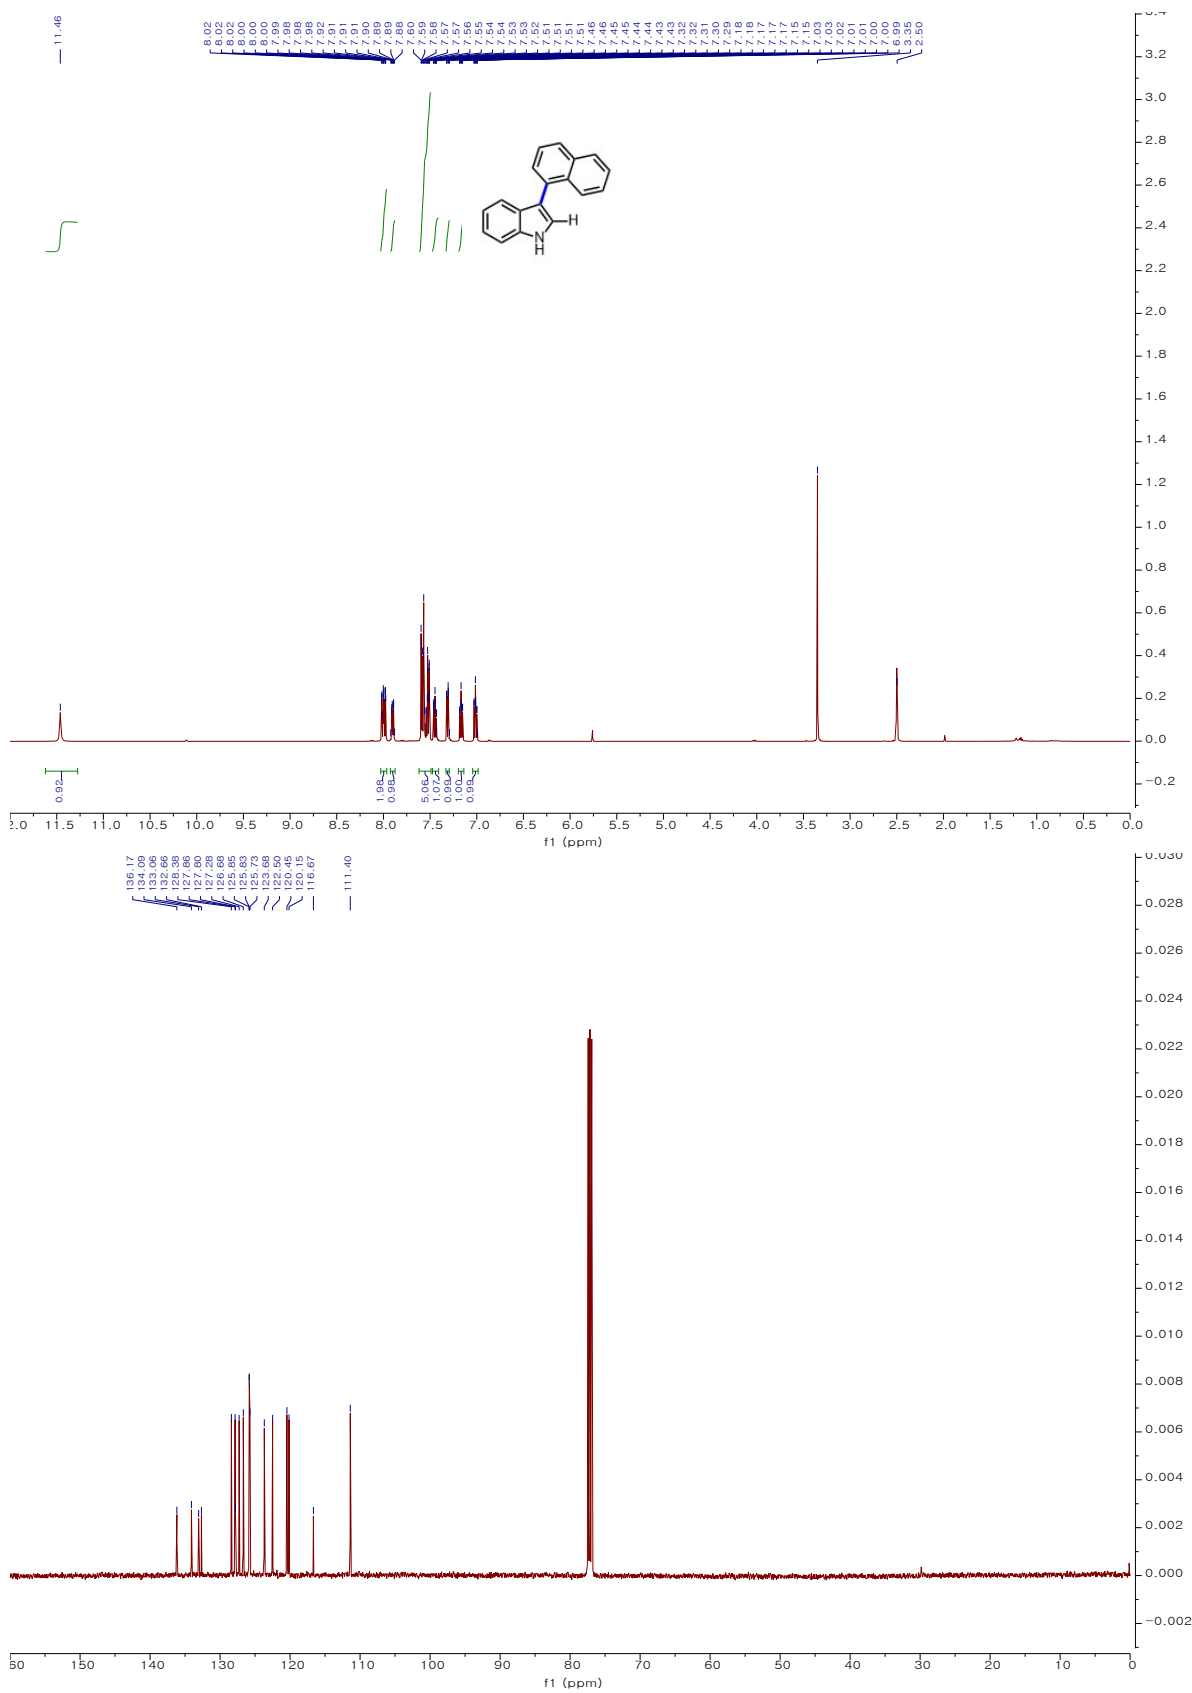

### 3-(*o*-Tolyl)-1*H*-indole (4a);

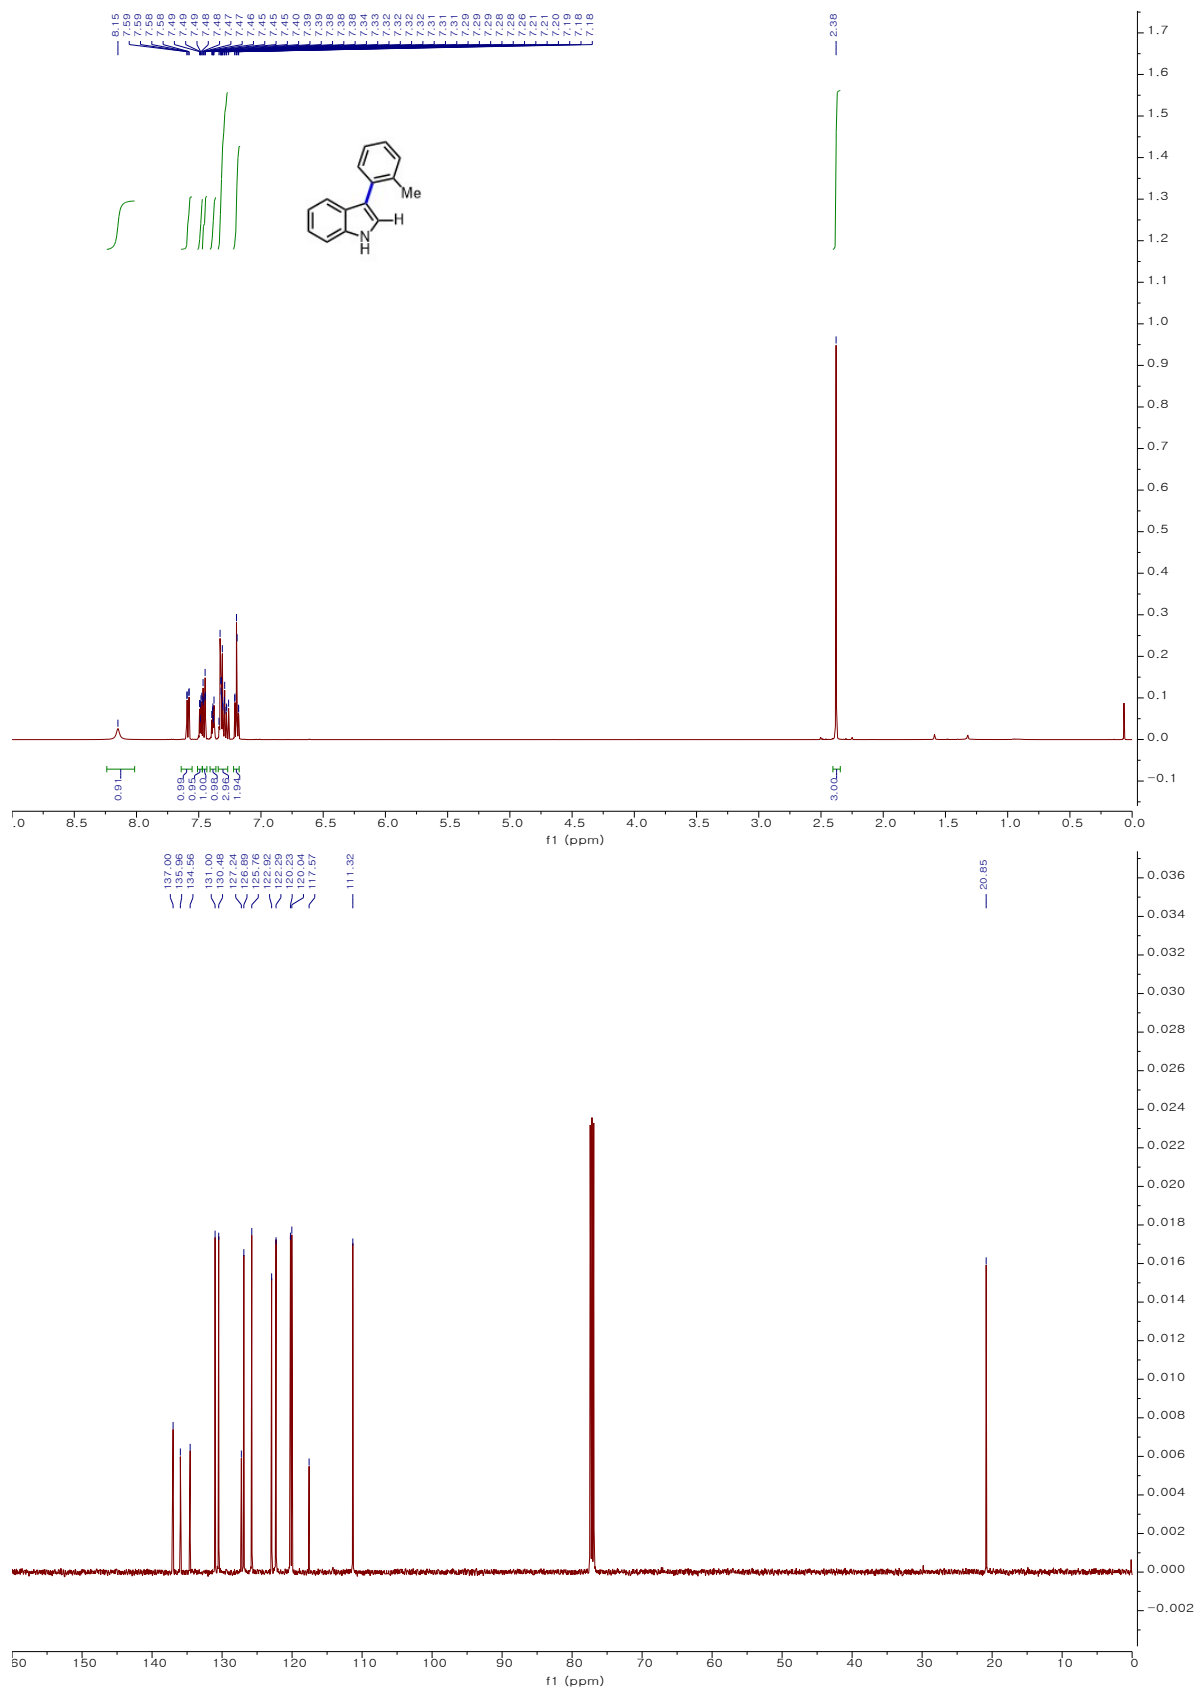

**3-(2,6-Dimethylphenyl)-1H-indole (4ao);**

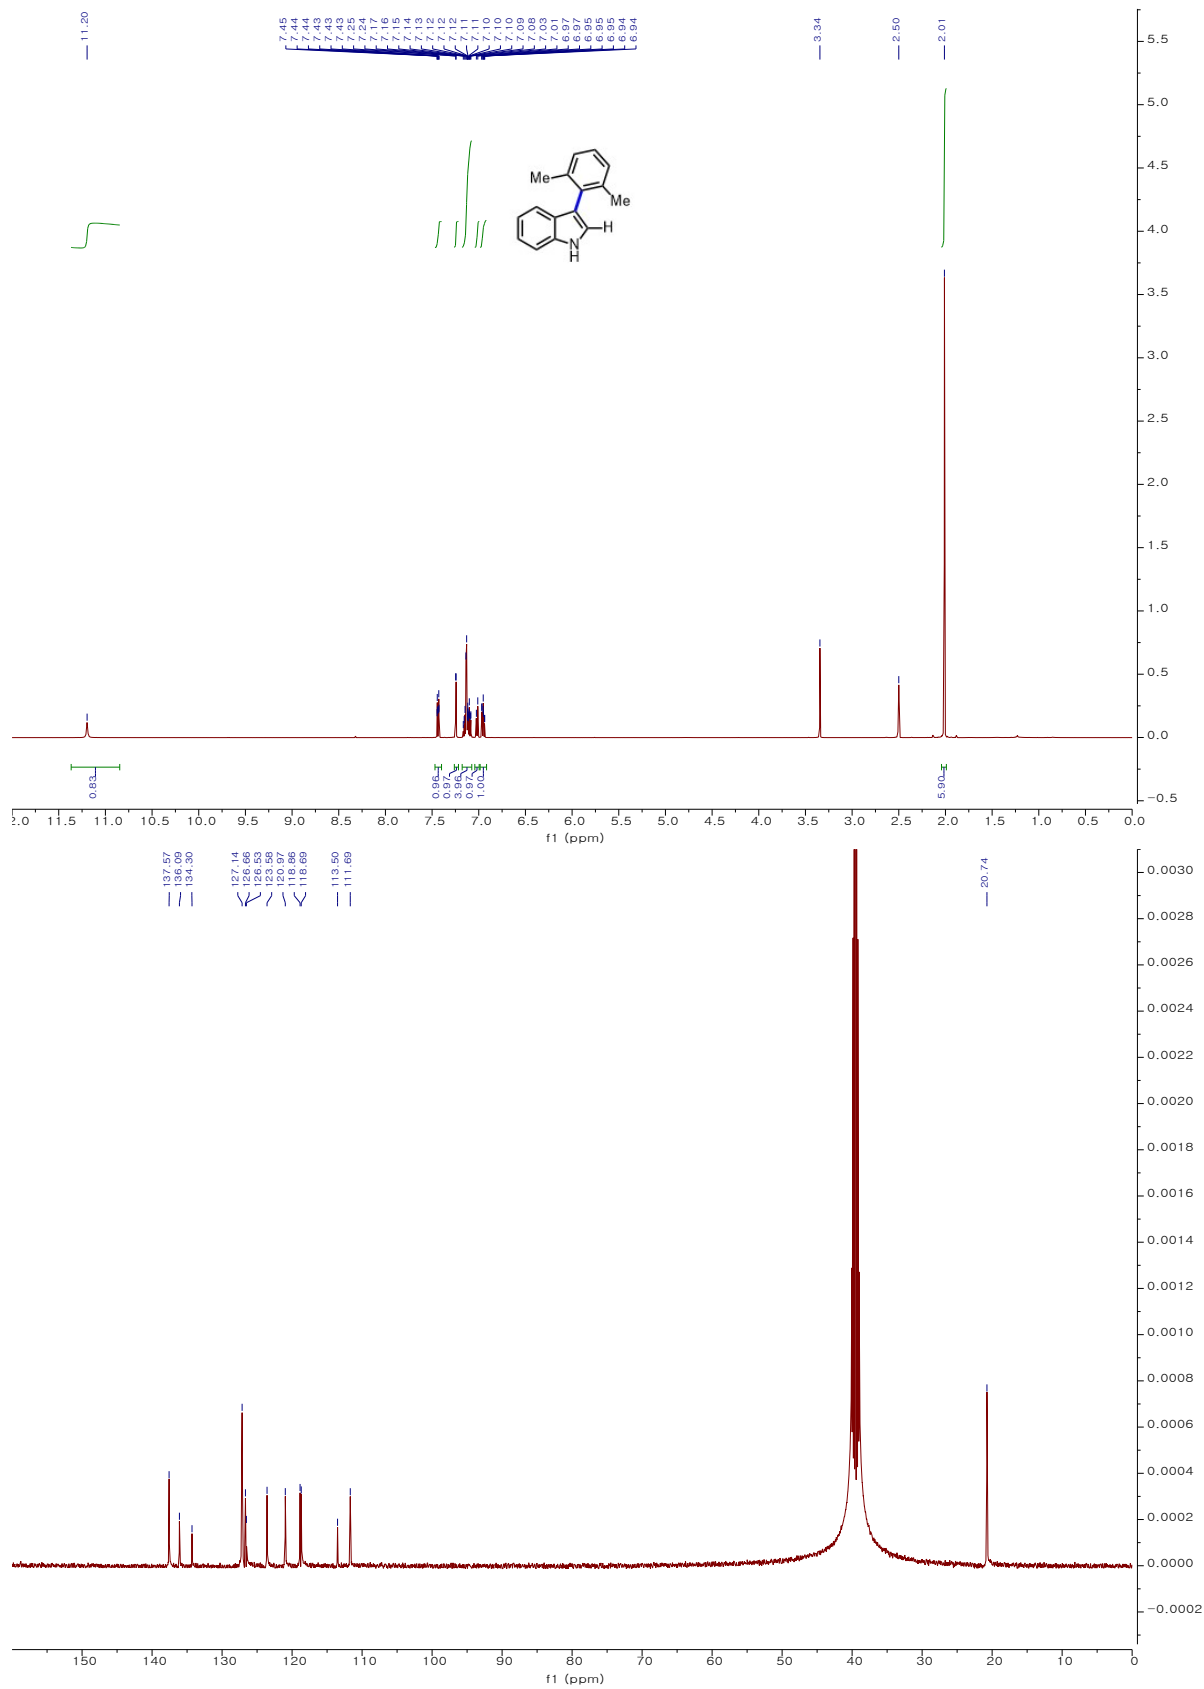

## 7. References

1. N. R. Deprez, D. Kalyani, A. Krause, M. S. Sanford, *J. Am. Chem. Soc.* 2006, **128**, 4972-4973.
2. R. J. Phipps, N. P. Grimster, M. J. Gaunt, *J. Am. Chem. Soc.* 2008, **130**, 8172-8174.
3. F. Campana, B. M. Massaccesi, S. Santoro, O. piermatti, L. Vaccaro, *ACS Sustain. Chem. Eng.*, 2020, **8**, 16441-16450.
4. J. R. Huang, L. Qin, Y. Q. Zhu, Q. Song, L. Dong, *Chem. Commun.*, 2015, **51**, 2844-2847.
5. L. Joucla, N. Batail, L. Djakovitch, *Adv. Synth. Catal.*, 2010, **352**, 2929-2936.
6. X. Wang, B. S. Lane, D. Sames, *J. Am. Chem. Soc.* 2005, **127**, 4996-4997.
7. S. D. Yang, C. L. Sun, Z. Fang, B. J. Li, Y. Z. Li, Z. J. Shi, *Angew. Chem. Int. Ed.*, 2008, **47**, 1473-1476.
8. J. Kwon, J. Chung, S. Byun, B. M. Kim, *Asian J. Org. Chem.*, 2016, **5**, 470-476.
9. P. G. Alsabeh, R. J. Lundgren, L. E. Longobardi, M. Stradiotto, *Chem. Commun.*, 2011, **47**, 6936-6938.
10. S. Luo, Z. Hu, Q. Zhu, *Org. Chem. Front.*, 2016, **3**, 364-367.
11. S. Chen, Y. Liao, F. Zhao, H. Qi, S. Liu, G. H. Deng, *Org. Lett.*, 2014, **16**, 1618-1621.
12. Y. X. Chen, S. B. Guo, K. N. Li, J. P. Qu, H. Yuan, Q. R. Hua, et al., *Adv Synth Catal*, 2013, **355**, 711-715.
13. K. Ban, Y. Yamamoto, H. Sajiki, Y. Sawama, *Org. Biomol. Chem.*, 2020, **18**, 3898-3902.
14. S. H. Son, J. W. Shin, H. J. Won, H. S. Yoo, Y. Y. Cho, S. L. Kim, Y. H. Jang, B. Y. Park, N. J. Kim, *Org. Lett.* 2021, **23**, 7467-7471.
15. J. Chen, J. Wu, *Angew. Chem. Int. Ed.* 2017, **56**, 3951-3955.
